# Supplementary material for: Comprehensive Analysis of Necroptosis Landscape in Skin Cutaneous Melanoma for Appealing its Implications in Prognosis Estimation and Microenvironment Status
Source: MDPI journal article supplement (doi:10.3390/jpm13020245), 2023-01-29
Supplement: s1 [file s1]

**Table S5 The heat map of immune cells in clusters.**

| immune                                       | pvalue   |
|----------------------------------------------|----------|
| T cell CD4+_TIMER                            | 0.006243 |
| Neutrophil_TIMER                             | 0.00254  |
| Macrophage_TIMER                             | 5.75E-06 |
| B cell naive_CIBERSORT                       | 0.00264  |
| T cell CD8+_CIBERSORT                        | 0.041608 |
| T cell CD4+ memory activated_CIBERSORT       | 0.030733 |
| Monocyte_CIBERSORT                           | 0.00053  |
| Macrophage M0_CIBERSORT                      | 0.006627 |
| Myeloid dendritic cell resting_CIBERSORT     | 0.009105 |
| B cell naive_CIBERSORT-ABS                   | 0.035257 |
| T cell CD8+_CIBERSORT-ABS                    | 0.001351 |
| T cell CD4+ memory resting_CIBERSORT-ABS     | 0.034098 |
| T cell CD4+ memory activated_CIBERSORT-ABS   | 0.018583 |
| T cell follicular helper_CIBERSORT-ABS       | 0.016648 |
| NK cell activated_CIBERSORT-ABS              | 0.010351 |
| Monocyte_CIBERSORT-ABS                       | 2.12E-06 |
| Macrophage M1_CIBERSORT-ABS                  | 0.000374 |
| Macrophage M2_CIBERSORT-ABS                  | 2.99E-05 |
| Myeloid dendritic cell resting_CIBERSORT-ABS | 0.001248 |
| Macrophage M1_QUANTISEQ                      | 0.000234 |
| Monocyte_QUANTISEQ                           | 8.84E-11 |
| Neutrophil_QUANTISEQ                         | 0.000353 |
| NK cell_QUANTISEQ                            | 5.43E-09 |
| T cell CD4+ (non-regulatory)_QUANTISEQ       | 3.46E-10 |
| T cell CD8+_QUANTISEQ                        | 0.006207 |
| T cell regulatory (Tregs)_QUANTISEQ          | 0.000222 |
| Myeloid dendritic cell_QUANTISEQ             | 5.51E-07 |
| uncharacterized cell_QUANTISEQ               | 3.56E-05 |
| T cell CD8+_MCPCOUNTER                       | 0.001758 |
| cytotoxicity score_MCPCOUNTER                | 1.29E-08 |
| NK cell_MCPCOUNTER                           | 0.000105 |
| Monocyte_MCPCOUNTER                          | 0.0004   |
| Macrophage/Monocyte_MCPCOUNTER               | 0.0004   |
| Myeloid dendritic cell_MCPCOUNTER            | 6.27E-06 |
| Endothelial cell_MCPCOUNTER                  | 2.07E-08 |
| Cancer associated fibroblast_MCPCOUNTER      | 0.016205 |
| T cell CD4+ memory_XCELL                     | 0.025517 |
| T cell CD4+ effector memory_XCELL            | 0.01492  |
| T cell CD8+_XCELL                            | 0.005311 |
| T cell CD8+ central memory_XCELL             | 0.023667 |
| Myeloid dendritic cell_XCELL                 | 0.017834 |
| Endothelial cell_XCELL                       | 0.000337 |

|                                 |          |
|---------------------------------|----------|
| Hematopoietic stem cell_XCELL   | 4.25E-05 |
| Monocyte_XCELL                  | 0.002852 |
| T cell NK_XCELL                 | 0.006399 |
| T cell CD4+ Th1_XCELL           | 0.003256 |
| T cell regulatory (Tregs)_XCELL | 0.001741 |
| stroma score_XCELL              | 0.000496 |
| T cell CD4+_EPIC                | 0.039428 |
| T cell CD8+_EPIC                | 8.43E-07 |
| Endothelial cell_EPIC           | 3.04E-05 |
| Macrophage_EPIC                 | 6.37E-05 |
| uncharacterized cell_EPIC       | 7.17E-06 |
