# Supplementary material for: Comprehensive Analysis of Necroptosis Landscape in Skin Cutaneous Melanoma for Appealing its Implications in Prognosis Estimation and Microenvironment Status
Source: MDPI journal article supplement (doi:10.3390/jpm13020245), 2023-01-29
Supplement: s1 [file s1]

# Identification and Validation of Necroptosis Landscape on Therapy and Prognosis in Skin Cutaneous Melanoma

Supplement\_Figure

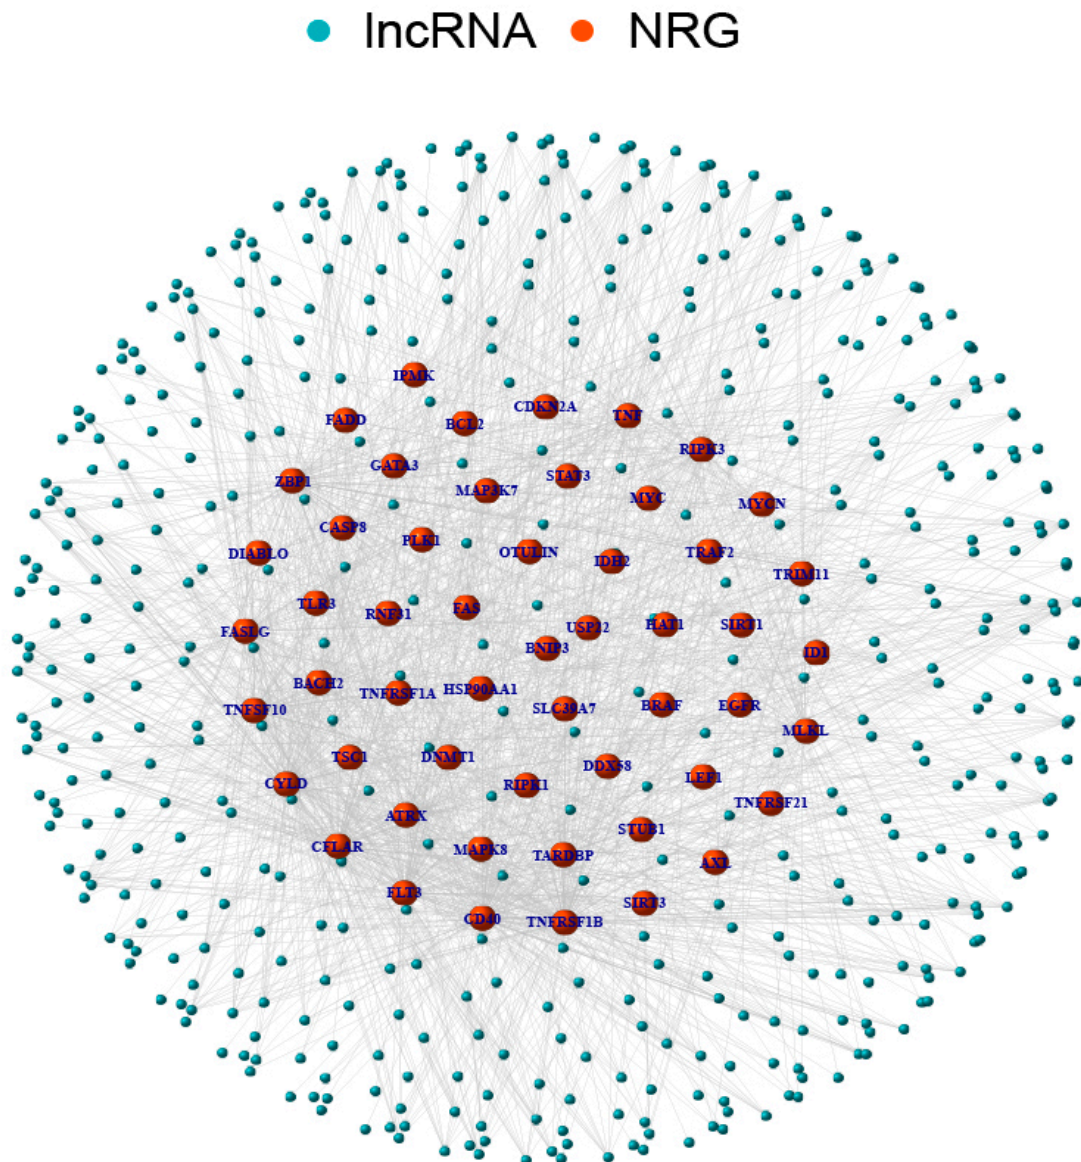

Figure S1 The network between necroptosis genes and lncRNAs in SKCM.  
The network between necroptosis genes and lncRNAs in SKCM (green: mRNAs, blue: LncRNAs; correlation coefficients  $> 0.4$  and  $p < 0.001$ ).

Figure S2

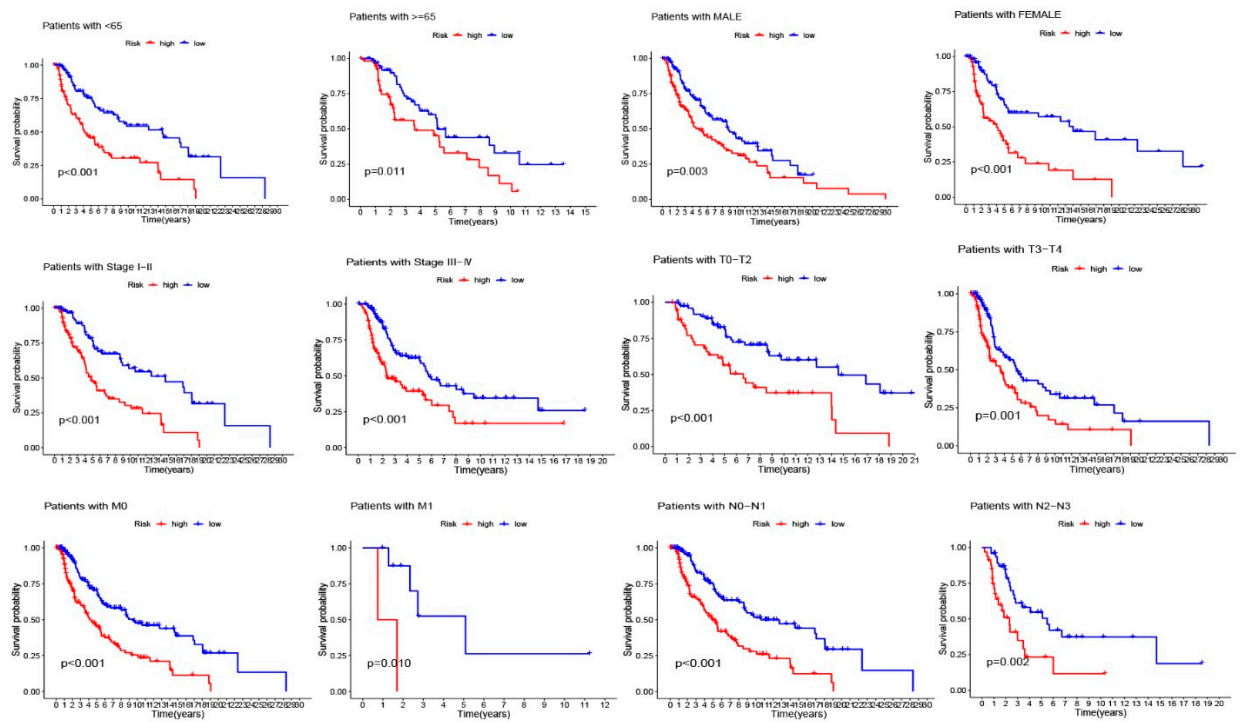

Figure S2 Kaplan-Meier analysis in clinicopathological features.  
Kaplan-Meier survival curves of OS prognostic value stratified by age, gender, stage, T, M, or N between low- and high-risk groups in the entire set.

Figure S3

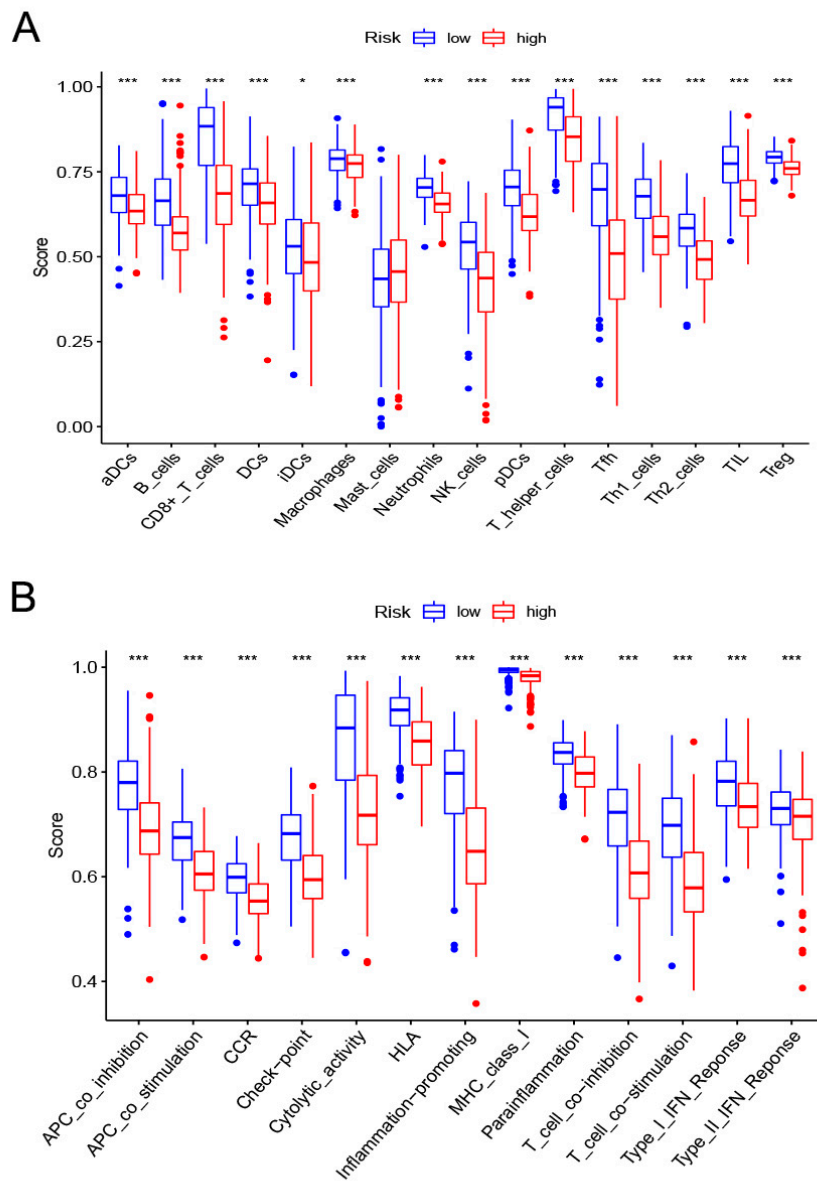

FigureS3 The ssGSEA analysis between high- and low-risk group.  
The ssGSEA scores of immune cells and immune functions between high- and low-risk group (\* $p < 0.05$ , \*\*\* $p < 0.001$ ).

Figure S4

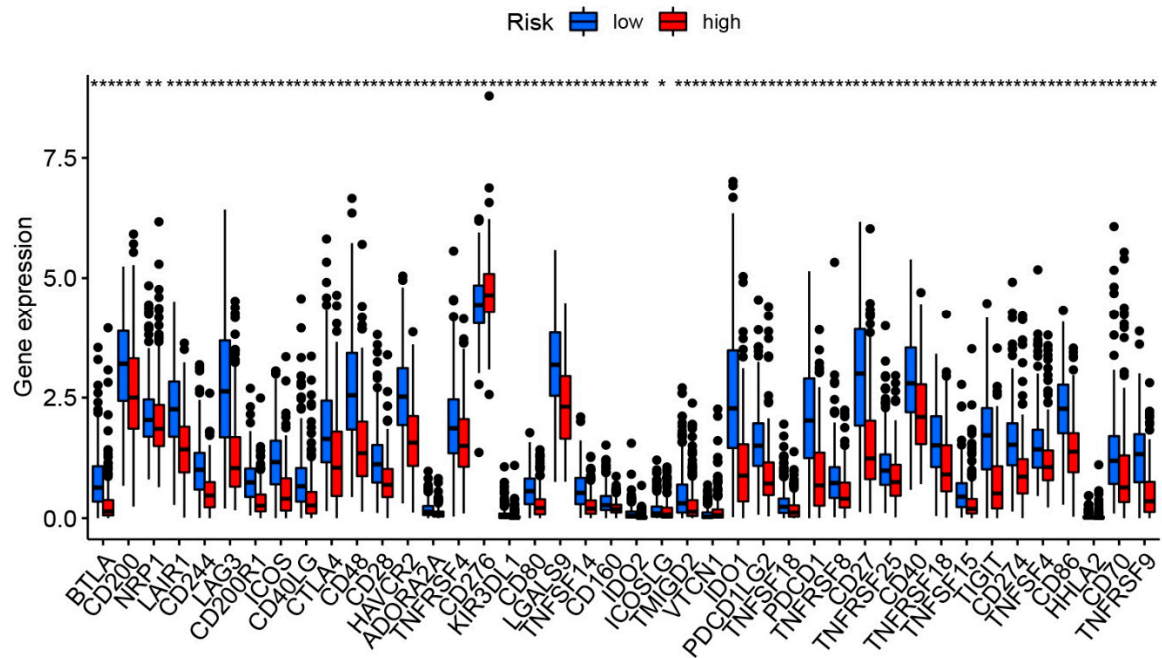

Figure S4 The difference of 42 checkpoints expression.  
The difference of 42 checkpoints expression between high- and low-risk group (\* $p < 0.05$ , \*\* $p < 0.01$ , and \*\*\* $p < 0.001$ ).

Figure S5

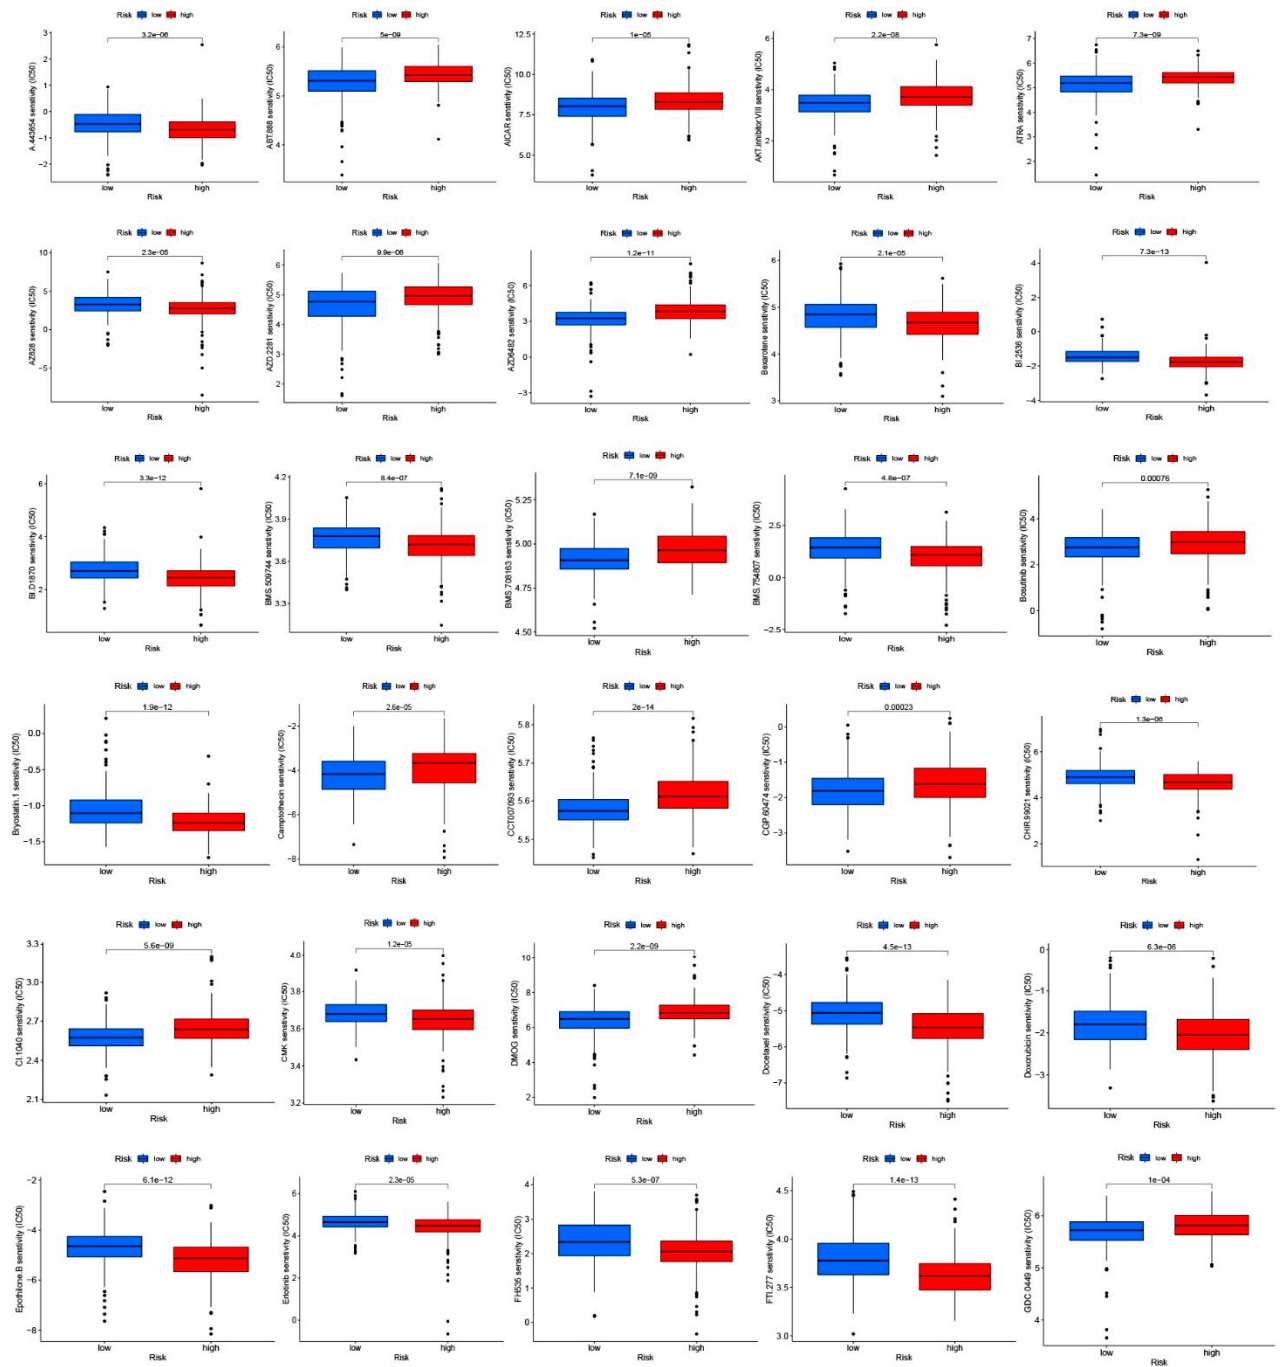

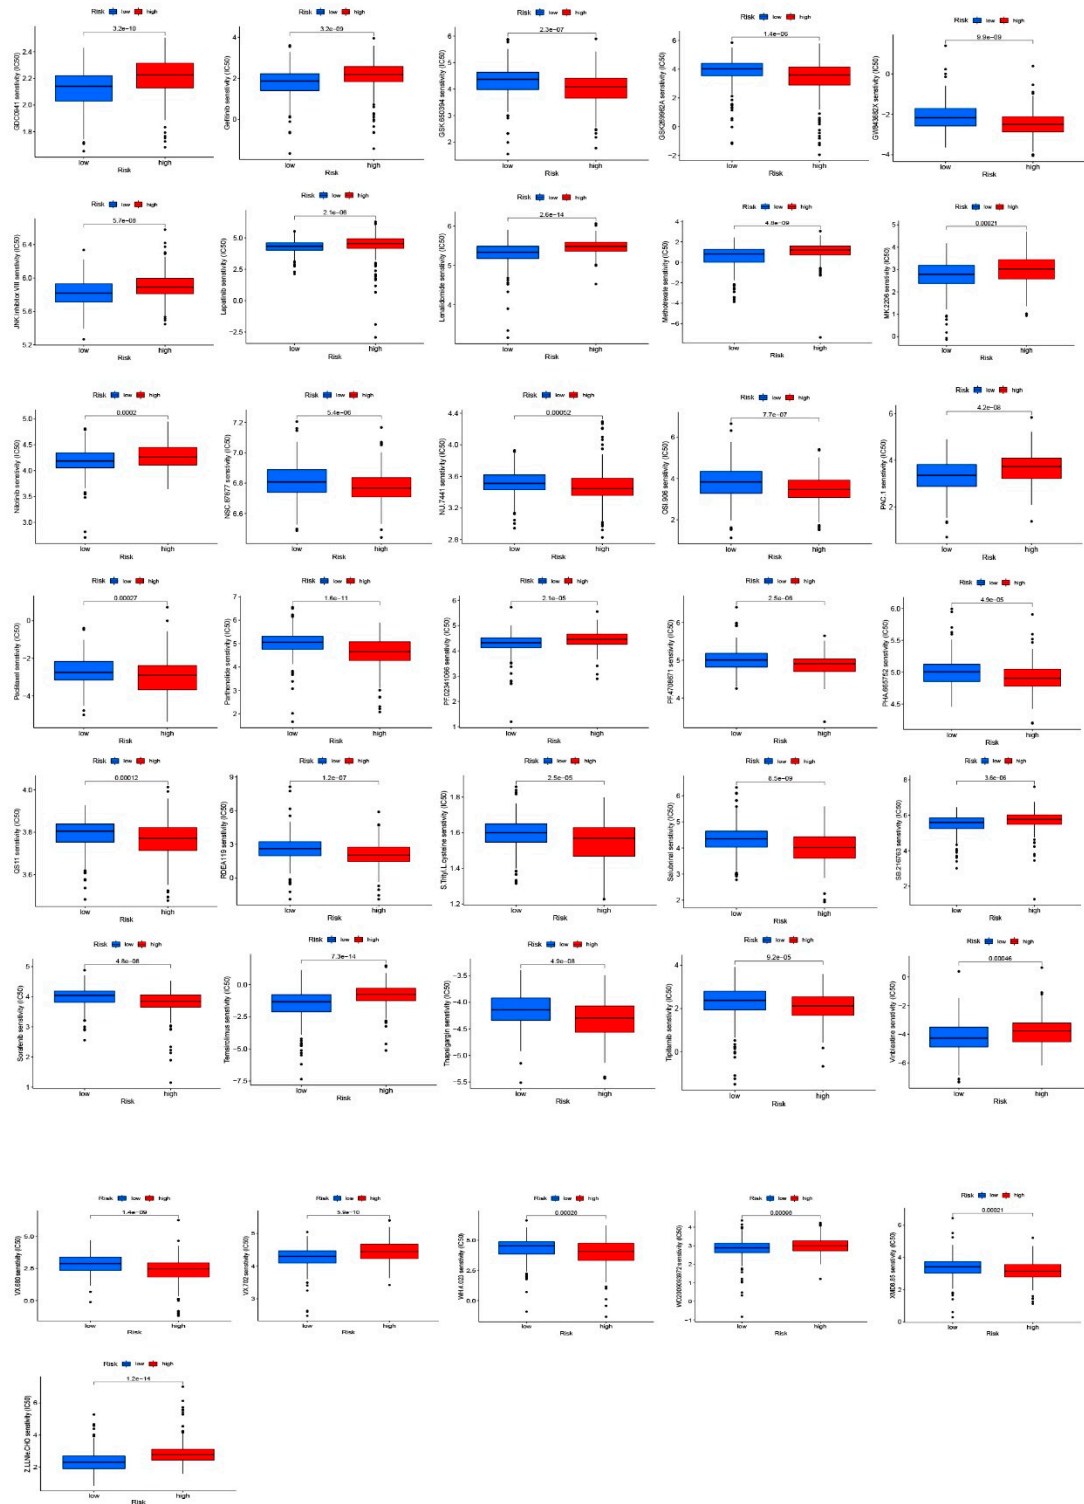

Figure S5 Potential therapeutic medicine of subgroups.  
Potential therapeutic medicine of subgroups (all  $p < 0.001$ ).



Figure S6

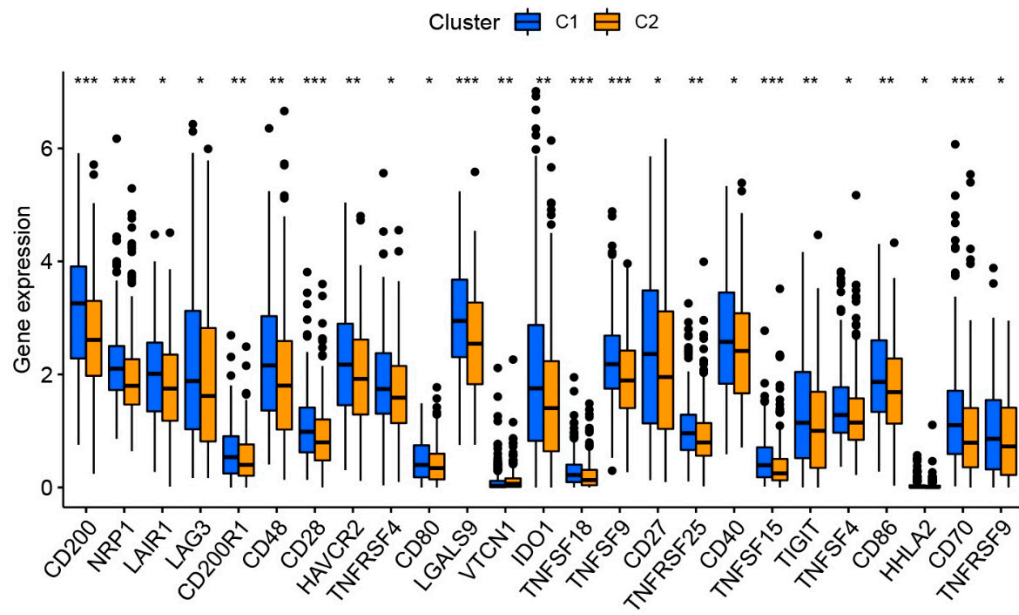

Figure S6 The difference of 25 checkpoints expression in different clusters.  
The difference of 25 checkpoints expression in different clusters (\* $p < 0.05$ , \*\* $p < 0.01$ , and \*\*\* $p < 0.001$ ).

Figure S7

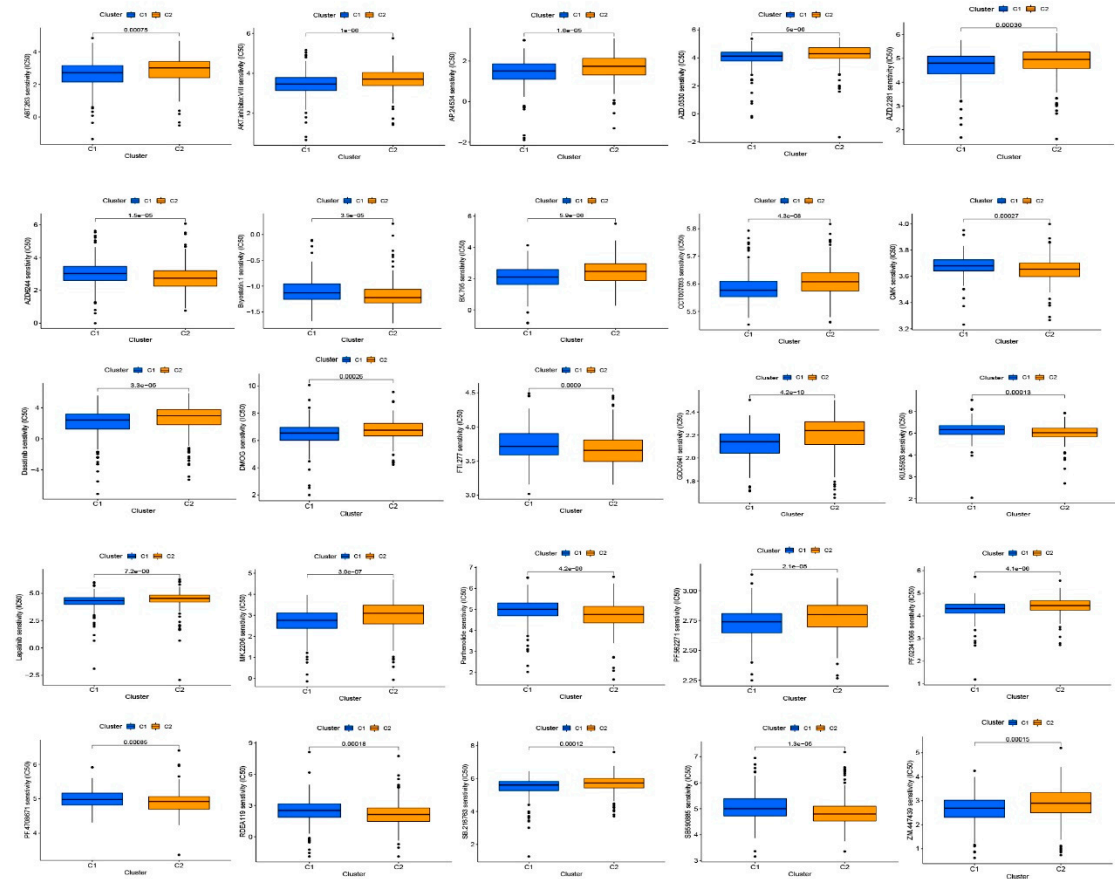

Figure S7 Potential therapeutic medicine in different clusters.  
Potential therapeutic medicine in different clusters (all  $p < 0.001$ ).
