# Supplementary material for: Comprehensive Analysis of Necroptosis Landscape in Skin Cutaneous Melanoma for Appealing its Implications in Prognosis Estimation and Microenvironment Status
Source: MDPI journal article supplement (doi:10.3390/jpm13020245), 2023-01-29
Supplement: s1 [file s1]

**Table S2 The network between necroptosis-related mRNAs and lncRNAs.**

| NRG      | lncRNA     | cor      | pvalue   | Regulation |
|----------|------------|----------|----------|------------|
| IPMK     | ENTPD1-AS1 | 0.451729 | 4.62E-25 | postive    |
| FADD     | ALG1L9P    | 0.446827 | 1.70E-24 | postive    |
| ZBP1     | AC087045.2 | 0.420914 | 1.20E-21 | postive    |
| DIABLO   | ITFG2-AS1  | 0.41865  | 2.07E-21 | postive    |
| FASLG    | HCG27      | 0.417266 | 2.88E-21 | postive    |
| ZBP1     | HCG27      | 0.490117 | 7.85E-30 | postive    |
| TNFSF10  | HCG27      | 0.440788 | 8.25E-24 | postive    |
| CYLD     | HCG27      | 0.560713 | 2.37E-40 | postive    |
| CFLAR    | HCG27      | 0.518839 | 8.13E-34 | postive    |
| FLT3     | HCG27      | 0.422668 | 7.82E-22 | postive    |
| CD40     | HCG27      | 0.422802 | 7.57E-22 | postive    |
| ZBP1     | LINC02384  | 0.621629 | 1.06E-51 | postive    |
| TNFRSF1B | LINC02384  | 0.465089 | 1.18E-26 | postive    |
| CYLD     | LINC02384  | 0.430638 | 1.09E-22 | postive    |
| CFLAR    | LINC02384  | 0.412035 | 9.96E-21 | postive    |
| FLT3     | LINC02384  | 0.443069 | 4.56E-24 | postive    |
| CD40     | LINC02384  | 0.498357 | 6.17E-31 | postive    |
| SIRT3    | TOLLIP-AS1 | 0.507059 | 3.89E-32 | postive    |
| AXL      | AL158166.1 | 0.424854 | 4.58E-22 | postive    |
| TNFRSF21 | MIR100HG   | 0.406835 | 3.35E-20 | postive    |
| FASLG    | AL022316.1 | 0.45739  | 9.96E-26 | postive    |
| MLKL     | AL022316.1 | 0.430768 | 1.06E-22 | postive    |
| ZBP1     | AL022316.1 | 0.576395 | 4.77E-43 | postive    |
| TNFSF10  | AL022316.1 | 0.425066 | 4.35E-22 | postive    |
| TNFRSF1B | AL022316.1 | 0.5569   | 1.02E-39 | postive    |
| CYLD     | AL022316.1 | 0.442149 | 5.80E-24 | postive    |
| CFLAR    | AL022316.1 | 0.407237 | 3.05E-20 | postive    |
| FLT3     | AL022316.1 | 0.470278 | 2.72E-27 | postive    |
| CD40     | AL022316.1 | 0.5091   | 2.01E-32 | postive    |
| SIRT3    | AP006621.3 | 0.437961 | 1.71E-23 | postive    |
| ID1      | LINC02432  | 0.50707  | 3.88E-32 | postive    |
| TRIM11   | AL121906.2 | 0.416378 | 3.56E-21 | postive    |
| FASLG    | LINC02195  | 0.434303 | 4.34E-23 | postive    |
| MYCN     | MYCNOS     | 0.53938  | 6.58E-37 | postive    |
| TRIM11   | AC008608.2 | 0.473204 | 1.18E-27 | postive    |
| FASLG    | AC004847.1 | 0.568905 | 9.64E-42 | postive    |
| MLKL     | AC004847.1 | 0.483873 | 5.16E-29 | postive    |
| RIPK3    | AC004847.1 | 0.577812 | 2.68E-43 | postive    |
| TNF      | AC004847.1 | 0.582059 | 4.66E-44 | postive    |
| ZBP1     | AC004847.1 | 0.646785 | 3.72E-57 | postive    |
| TNFSF10  | AC004847.1 | 0.496416 | 1.13E-30 | postive    |
| TNFRSF1B | AC004847.1 | 0.737998 | 3.81E-82 | postive    |

|          |            |          |          |         |
|----------|------------|----------|----------|---------|
| CYLD     | AC004847.1 | 0.54892  | 2.04E-38 | postive |
| CFLAR    | AC004847.1 | 0.55833  | 5.91E-40 | postive |
| FLT3     | AC004847.1 | 0.704103 | 9.68E-72 | postive |
| CD40     | AC004847.1 | 0.637189 | 5.15E-55 | postive |
| CDKN2A   | CDKN2A-DT  | 0.727526 | 9.19E-79 | postive |
| ZBP1     | AL133467.1 | 0.707378 | 1.11E-72 | postive |
| TNFRSF1B | AL133467.1 | 0.446299 | 1.96E-24 | postive |
| FLT3     | AL133467.1 | 0.477799 | 3.10E-28 | postive |
| BCL2     | AC027130.1 | 0.412812 | 8.30E-21 | postive |
| GATA3    | AP001207.3 | 0.539244 | 6.91E-37 | postive |
| FASLG    | AC133644.1 | 0.628092 | 4.71E-53 | postive |
| MLKL     | AC133644.1 | 0.536097 | 2.12E-36 | postive |
| RIPK3    | AC133644.1 | 0.403563 | 7.10E-20 | postive |
| TNF      | AC133644.1 | 0.418989 | 1.91E-21 | postive |
| CASP8    | AC133644.1 | 0.426208 | 3.28E-22 | postive |
| ZBP1     | AC133644.1 | 0.732138 | 3.12E-80 | postive |
| TNFSF10  | AC133644.1 | 0.580646 | 8.36E-44 | postive |
| TNFRSF1B | AC133644.1 | 0.697027 | 9.40E-70 | postive |
| CYLD     | AC133644.1 | 0.661086 | 1.71E-60 | postive |
| CFLAR    | AC133644.1 | 0.629223 | 2.71E-53 | postive |
| FLT3     | AC133644.1 | 0.622556 | 6.83E-52 | postive |
| CD40     | AC133644.1 | 0.638626 | 2.49E-55 | postive |
| TNFRSF1B | AC015819.2 | 0.426504 | 3.05E-22 | postive |
| TLR3     | AC022034.1 | 0.400977 | 1.28E-19 | postive |
| FASLG    | USP30-AS1  | 0.833494 | #####    | postive |
| MLKL     | USP30-AS1  | 0.599192 | 3.09E-47 | postive |
| RIPK3    | USP30-AS1  | 0.495268 | 1.61E-30 | postive |
| TNF      | USP30-AS1  | 0.457634 | 9.32E-26 | postive |
| ZBP1     | USP30-AS1  | 0.791589 | #####    | postive |
| TNFSF10  | USP30-AS1  | 0.607484 | 7.62E-49 | postive |
| TNFRSF1B | USP30-AS1  | 0.779146 | 3.48E-97 | postive |
| CYLD     | USP30-AS1  | 0.564267 | 5.97E-41 | postive |
| CFLAR    | USP30-AS1  | 0.618498 | 4.69E-51 | postive |
| FLT3     | USP30-AS1  | 0.508955 | 2.11E-32 | postive |
| CD40     | USP30-AS1  | 0.580596 | 8.54E-44 | postive |
| FLT3     | AC002546.1 | 0.586061 | 8.77E-45 | postive |
| CD40     | AC002546.1 | 0.405923 | 4.13E-20 | postive |
| BACH2    | AL358332.1 | 0.452091 | 4.19E-25 | postive |
| GATA3    | AL358332.1 | 0.793837 | #####    | postive |
| MYCN     | AL358332.1 | 0.641757 | 5.04E-56 | postive |
| TSC1     | AL355574.1 | 0.434842 | 3.79E-23 | postive |
| FASLG    | U62317.3   | 0.584189 | 1.92E-44 | postive |
| MLKL     | U62317.3   | 0.520727 | 4.31E-34 | postive |
| ZBP1     | U62317.3   | 0.677908 | 1.16E-64 | postive |

|          |            |          |          |          |
|----------|------------|----------|----------|----------|
| TNFSF10  | U62317.3   | 0.502898 | 1.47E-31 | postive  |
| TNFRSF1B | U62317.3   | 0.530658 | 1.44E-35 | postive  |
| CYLD     | U62317.3   | 0.439468 | 1.16E-23 | postive  |
| CFLAR    | U62317.3   | 0.456412 | 1.30E-25 | postive  |
| CD40     | U62317.3   | 0.44056  | 8.75E-24 | postive  |
| ATRX     | CIRBP-AS1  | -0.41093 | 1.29E-20 | negative |
| GATA3    | AC016877.3 | 0.428956 | 1.66E-22 | postive  |
| ID1      | HOXC13-AS  | 0.404893 | 5.24E-20 | postive  |
| GATA3    | HOXC13-AS  | 0.537004 | 1.54E-36 | postive  |
| MAPK8    | AL450384.2 | 0.424764 | 4.68E-22 | postive  |
| TARDBP   | AL450384.2 | 0.445341 | 2.52E-24 | postive  |
| AXL      | BX640514.2 | 0.41882  | 1.98E-21 | postive  |
| GATA3    | AL354950.1 | 0.551331 | 8.31E-39 | postive  |
| MYCN     | AL354950.1 | 0.59724  | 7.28E-47 | postive  |
| FASLG    | AL357054.4 | 0.409606 | 1.76E-20 | postive  |
| FASLG    | AC004921.1 | 0.598681 | 3.87E-47 | postive  |
| MLKL     | AC004921.1 | 0.444163 | 3.43E-24 | postive  |
| RIPK3    | AC004921.1 | 0.473903 | 9.62E-28 | postive  |
| ZBP1     | AC004921.1 | 0.561598 | 1.68E-40 | postive  |
| TNFRSF1B | AC004921.1 | 0.638383 | 2.81E-55 | postive  |
| CD40     | AC004921.1 | 0.434319 | 4.32E-23 | postive  |
| TRIM11   | AC114271.1 | 0.460111 | 4.72E-26 | postive  |
| STUB1    | AC114271.1 | 0.423941 | 5.73E-22 | postive  |
| ATRX     | AC114271.1 | -0.41568 | 4.21E-21 | negative |
| TARDBP   | AC114271.1 | -0.41978 | 1.58E-21 | negative |
| DIABLO   | AL354928.1 | 0.433939 | 4.76E-23 | postive  |
| TARDBP   | AL050341.2 | 0.468953 | 3.97E-27 | postive  |
| TRIM11   | TFAP2A-AS1 | 0.420492 | 1.33E-21 | postive  |
| TNF      | LINC01215  | 0.451391 | 5.05E-25 | postive  |
| ZBP1     | LINC01215  | 0.426603 | 2.98E-22 | postive  |
| TNFRSF1B | LINC01215  | 0.429089 | 1.61E-22 | postive  |
| CYLD     | LINC01215  | 0.577534 | 3.00E-43 | postive  |
| CFLAR    | LINC01215  | 0.480754 | 1.30E-28 | postive  |
| FLT3     | LINC01215  | 0.688731 | 1.70E-67 | postive  |
| BACH2    | LINC01215  | 0.507412 | 3.48E-32 | postive  |
| CD40     | LINC01215  | 0.60131  | 1.21E-47 | postive  |
|          | SLC25A25-  |          |          |          |
| BACH2    | AS1        | 0.424916 | 4.51E-22 | postive  |
| CYLD     | PIK3CD-AS2 | -0.42781 | 2.21E-22 | negative |
| DIABLO   | ST20-AS1   | 0.453962 | 2.53E-25 | postive  |
| LEF1     | LEF1-AS1   | 0.689868 | 8.43E-68 | postive  |
| DIABLO   | WWTR1-AS1  | 0.42351  | 6.37E-22 | postive  |
| TRIM11   | AC006942.1 | 0.438641 | 1.44E-23 | postive  |
| GATA3    | LINC01836  | 0.443341 | 4.25E-24 | postive  |

|          |            |          |          |          |
|----------|------------|----------|----------|----------|
| EGFR     | LINC01836  | 0.48115  | 1.16E-28 | postive  |
| TNFSF10  | AC104083.1 | 0.449607 | 8.14E-25 | postive  |
| TNFRSF1B | AC104083.1 | 0.429537 | 1.44E-22 | postive  |
| CYLD     | AC104083.1 | 0.461084 | 3.61E-26 | postive  |
| FLT3     | AC104083.1 | 0.452322 | 3.94E-25 | postive  |
| TRIM11   | AL163051.1 | 0.443917 | 3.66E-24 | postive  |
| MAPK8    | AC007390.1 | 0.498548 | 5.81E-31 | postive  |
| IPMK     | AC007390.1 | 0.401551 | 1.12E-19 | postive  |
| SIRT1    | AC007390.1 | 0.430398 | 1.16E-22 | postive  |
| ATRX     | AC007390.1 | 0.425602 | 3.81E-22 | postive  |
| TARDBP   | AC007390.1 | 0.469918 | 3.02E-27 | postive  |
| TNFRSF1B | AC245128.3 | 0.429069 | 1.62E-22 | postive  |
| TRAF2    | HHLA3      | 0.418624 | 2.08E-21 | postive  |
| FASLG    | AL158071.2 | 0.804881 | #####    | postive  |
| MLKL     | AL158071.2 | 0.460517 | 4.22E-26 | postive  |
| ZBP1     | AL158071.2 | 0.535149 | 2.97E-36 | postive  |
| TNFSF10  | AL158071.2 | 0.529727 | 1.99E-35 | postive  |
| TNFRSF1B | AL158071.2 | 0.596652 | 9.41E-47 | postive  |
| CYLD     | AL158071.2 | 0.445699 | 2.29E-24 | postive  |
| CFLAR    | AL158071.2 | 0.489049 | 1.09E-29 | postive  |
| MYC      | AC107027.3 | 0.426483 | 3.07E-22 | postive  |
| GATA3    | AC092171.3 | 0.637792 | 3.80E-55 | postive  |
| MYCN     | AC092171.3 | 0.467452 | 6.07E-27 | postive  |
| TARDBP   | AC080112.1 | -0.48955 | 9.34E-30 | negative |
| TRAF2    | LAMC1-AS1  | -0.40132 | 1.18E-19 | negative |
| STAT3    | SNHG17     | -0.40114 | 1.23E-19 | negative |
| BCL2     | AL121820.1 | 0.437215 | 2.07E-23 | postive  |
| FASLG    | AC022182.2 | 0.411396 | 1.16E-20 | postive  |
| ZBP1     | AC022182.2 | 0.570707 | 4.71E-42 | postive  |
| TNFRSF1B | AC022182.2 | 0.53001  | 1.80E-35 | postive  |
| CYLD     | AC022182.2 | 0.46599  | 9.17E-27 | postive  |
| CFLAR    | AC022182.2 | 0.423312 | 6.68E-22 | postive  |
| FLT3     | AC022182.2 | 0.518349 | 9.58E-34 | postive  |
| CD40     | AC022182.2 | 0.546615 | 4.76E-38 | postive  |
| TNF      | AC109446.2 | 0.465082 | 1.18E-26 | postive  |
| ZBP1     | AC109446.2 | 0.578049 | 2.43E-43 | postive  |
| TNFSF10  | AC109446.2 | 0.404526 | 5.70E-20 | postive  |
| TNFRSF1B | AC109446.2 | 0.537574 | 1.26E-36 | postive  |
| CYLD     | AC109446.2 | 0.521013 | 3.92E-34 | postive  |
| CFLAR    | AC109446.2 | 0.511661 | 8.75E-33 | postive  |
| FLT3     | AC109446.2 | 0.609351 | 3.26E-49 | postive  |
| CD40     | AC109446.2 | 0.627997 | 4.93E-53 | postive  |
| MAPK8    | AC018690.1 | 0.438923 | 1.34E-23 | postive  |
| MAP3K7   | AC018690.1 | 0.421784 | 9.69E-22 | postive  |

|          |            |          |          |         |
|----------|------------|----------|----------|---------|
| TARDBP   | AC018690.1 | 0.428712 | 1.77E-22 | postive |
| MLKL     | LINC02273  | 0.429403 | 1.49E-22 | postive |
| RIPK3    | LINC02273  | 0.458314 | 7.74E-26 | postive |
| TNF      | LINC02273  | 0.552896 | 4.62E-39 | postive |
| ZBP1     | LINC02273  | 0.562413 | 1.23E-40 | postive |
| TNFSF10  | LINC02273  | 0.458707 | 6.94E-26 | postive |
| TNFRSF1B | LINC02273  | 0.60076  | 1.55E-47 | postive |
| CYLD     | LINC02273  | 0.653218 | 1.23E-58 | postive |
| CFLAR    | LINC02273  | 0.568784 | 1.01E-41 | postive |
| FLT3     | LINC02273  | 0.810538 | #####    | postive |
| BACH2    | LINC02273  | 0.419773 | 1.58E-21 | postive |
| CD40     | LINC02273  | 0.651021 | 3.99E-58 | postive |
| CASP8    | AC018653.3 | 0.402542 | 8.96E-20 | postive |
| SIRT1    | AC016866.1 | 0.431757 | 8.25E-23 | postive |
| TRIM11   | A1BG-AS1   | 0.459139 | 6.17E-26 | postive |
| FASLG    | AC138207.5 | 0.677043 | 1.92E-64 | postive |
| MLKL     | AC138207.5 | 0.455351 | 1.74E-25 | postive |
| RIPK3    | AC138207.5 | 0.491821 | 4.67E-30 | postive |
| ZBP1     | AC138207.5 | 0.492671 | 3.60E-30 | postive |
| TNFSF10  | AC138207.5 | 0.600381 | 1.83E-47 | postive |
| TNFRSF1B | AC138207.5 | 0.68748  | 3.66E-67 | postive |
| CYLD     | AC138207.5 | 0.445838 | 2.21E-24 | postive |
| CFLAR    | AC138207.5 | 0.489803 | 8.64E-30 | postive |
| CD40     | AC138207.5 | 0.40276  | 8.53E-20 | postive |
| MAPK8    | AL157392.3 | 0.52487  | 1.06E-34 | postive |
| EGFR     | AC114956.1 | 0.665488 | 1.47E-61 | postive |
| MLKL     | LINC01550  | 0.448243 | 1.17E-24 | postive |
| RIPK3    | LINC01550  | 0.430406 | 1.16E-22 | postive |
| TNF      | LINC01550  | 0.444154 | 3.44E-24 | postive |
| ZBP1     | LINC01550  | 0.406912 | 3.29E-20 | postive |
| TNFSF10  | LINC01550  | 0.408299 | 2.39E-20 | postive |
| TNFRSF1B | LINC01550  | 0.520077 | 5.37E-34 | postive |
| CYLD     | LINC01550  | 0.478084 | 2.85E-28 | postive |
| CFLAR    | LINC01550  | 0.45627  | 1.35E-25 | postive |
| FLT3     | LINC01550  | 0.613988 | 3.86E-50 | postive |
| CD40     | LINC01550  | 0.44851  | 1.09E-24 | postive |
| FASLG    | AC006033.2 | 0.729337 | 2.45E-79 | postive |
| MLKL     | AC006033.2 | 0.508948 | 2.12E-32 | postive |
| RIPK3    | AC006033.2 | 0.454787 | 2.02E-25 | postive |
| TNF      | AC006033.2 | 0.405766 | 4.28E-20 | postive |
| ZBP1     | AC006033.2 | 0.595762 | 1.39E-46 | postive |
| TNFSF10  | AC006033.2 | 0.608153 | 5.63E-49 | postive |
| TNFRSF1B | AC006033.2 | 0.765921 | 5.15E-92 | postive |
| CYLD     | AC006033.2 | 0.606911 | 9.88E-49 | postive |

|          |            |          |          |          |
|----------|------------|----------|----------|----------|
| CFLAR    | AC006033.2 | 0.574337 | 1.10E-42 | postive  |
| FLT3     | AC006033.2 | 0.558067 | 6.53E-40 | postive  |
| CD40     | AC006033.2 | 0.503661 | 1.16E-31 | postive  |
| TRAF2    | AL441992.1 | 0.482912 | 6.87E-29 | postive  |
| DIABLO   | TMPO-AS1   | 0.439485 | 1.16E-23 | postive  |
| PLK1     | TMPO-AS1   | 0.566354 | 2.64E-41 | postive  |
| ZBP1     | AL512306.2 | 0.458394 | 7.57E-26 | postive  |
| TNFRSF1B | AL512306.2 | 0.415618 | 4.27E-21 | postive  |
| CYLD     | AL512306.2 | 0.487494 | 1.74E-29 | postive  |
| CFLAR    | AL512306.2 | 0.465746 | 9.82E-27 | postive  |
| FLT3     | AL512306.2 | 0.489249 | 1.02E-29 | postive  |
| CD40     | AL512306.2 | 0.562074 | 1.40E-40 | postive  |
| MAPK8    | LINC00641  | 0.409884 | 1.65E-20 | postive  |
| RNF31    | AC092295.2 | 0.459854 | 5.07E-26 | postive  |
| TNFRSF1B | LINC01150  | 0.475977 | 5.28E-28 | postive  |
| ID1      | GATA3-AS1  | 0.54826  | 2.60E-38 | postive  |
| BACH2    | GATA3-AS1  | 0.470691 | 2.42E-27 | postive  |
| GATA3    | GATA3-AS1  | 0.852319 | #####    | postive  |
| MYCN     | GATA3-AS1  | 0.675602 | 4.48E-64 | postive  |
| ATRX     | AC114956.2 | 0.412094 | 9.83E-21 | postive  |
| SIRT1    | AC009171.2 | -0.4171  | 3.00E-21 | negative |
| RIPK3    | AP003071.4 | 0.464127 | 1.55E-26 | postive  |
| MLKL     | LINC01506  | 0.430094 | 1.25E-22 | postive  |
| TNFRSF1B | LINC01506  | 0.41745  | 2.76E-21 | postive  |
| MAPK8    | AC005034.5 | 0.433855 | 4.86E-23 | postive  |
| ATRX     | AC005034.5 | 0.452645 | 3.61E-25 | postive  |
| TNF      | LINC01781  | 0.517942 | 1.10E-33 | postive  |
| ZBP1     | LINC01781  | 0.440555 | 8.77E-24 | postive  |
| TNFRSF1B | LINC01781  | 0.401935 | 1.03E-19 | postive  |
| CYLD     | LINC01781  | 0.490584 | 6.81E-30 | postive  |
| CFLAR    | LINC01781  | 0.408415 | 2.32E-20 | postive  |
| FLT3     | LINC01781  | 0.638224 | 3.05E-55 | postive  |
| BACH2    | LINC01781  | 0.42299  | 7.23E-22 | postive  |
| CD40     | LINC01781  | 0.555265 | 1.89E-39 | postive  |
| ZBP1     | HCFC1-AS1  | 0.519246 | 7.09E-34 | postive  |
| TNFRSF1B | HCFC1-AS1  | 0.441238 | 7.34E-24 | postive  |
| TRIM11   | AL117332.1 | 0.411832 | 1.05E-20 | postive  |
| FASLG    | PCED1B-AS1 | 0.607351 | 8.09E-49 | postive  |
| MLKL     | PCED1B-AS1 | 0.563566 | 7.84E-41 | postive  |
| RIPK3    | PCED1B-AS1 | 0.55105  | 9.23E-39 | postive  |
| TNF      | PCED1B-AS1 | 0.608208 | 5.49E-49 | postive  |
| CASP8    | PCED1B-AS1 | 0.418058 | 2.38E-21 | postive  |
| ZBP1     | PCED1B-AS1 | 0.776846 | 2.92E-96 | postive  |
| TNFSF10  | PCED1B-AS1 | 0.583945 | 2.13E-44 | postive  |

|          |            |          |          |          |
|----------|------------|----------|----------|----------|
| TNFRSF1B | PCED1B-AS1 | 0.775414 | 1.09E-95 | postive  |
| CYLD     | PCED1B-AS1 | 0.712884 | 2.73E-74 | postive  |
| CFLAR    | PCED1B-AS1 | 0.672062 | 3.50E-63 | postive  |
| FLT3     | PCED1B-AS1 | 0.792863 | #####    | postive  |
| CD40     | PCED1B-AS1 | 0.753904 | 1.32E-87 | postive  |
| SIRT3    | AP001318.2 | 0.418032 | 2.40E-21 | postive  |
| CYLD     | AC093726.1 | 0.407014 | 3.21E-20 | postive  |
| TARDBP   | AL031714.1 | 0.403563 | 7.10E-20 | postive  |
| SIRT1    | AC005288.1 | 0.440445 | 9.02E-24 | postive  |
| ATRX     | AC005288.1 | 0.447684 | 1.36E-24 | postive  |
| BCL2     | AC027097.1 | 0.437155 | 2.10E-23 | postive  |
| SIRT3    | AC100810.1 | 0.406787 | 3.39E-20 | postive  |
| EGFR     | AC080038.1 | 0.518017 | 1.07E-33 | postive  |
| GATA3    | LINC00885  | 0.688305 | 2.21E-67 | postive  |
| GATA3    | AC245041.1 | 0.700796 | 8.35E-71 | postive  |
| FASLG    | XXYLT1-AS2 | 0.543405 | 1.54E-37 | postive  |
| ZBP1     | XXYLT1-AS2 | 0.554525 | 2.51E-39 | postive  |
| TNFRSF1B | XXYLT1-AS2 | 0.516088 | 2.03E-33 | postive  |
| FLT3     | XXYLT1-AS2 | 0.45995  | 4.93E-26 | postive  |
| CD40     | XXYLT1-AS2 | 0.408359 | 2.35E-20 | postive  |
| AXL      | LINC00973  | 0.480301 | 1.49E-28 | postive  |
| AXL      | AC093673.1 | 0.466918 | 7.06E-27 | postive  |
| TRAF2    | NORAD      | -0.44231 | 5.56E-24 | negative |
| ATRX     | NORAD      | 0.550354 | 1.20E-38 | postive  |
| TRIM11   | AC138696.2 | 0.452848 | 3.42E-25 | postive  |
| TRAF2    | AC138696.2 | 0.433888 | 4.82E-23 | postive  |
| ATRX     | AC138696.2 | -0.41669 | 3.31E-21 | negative |
| TRAF2    | ARRDC1-AS1 | 0.618656 | 4.35E-51 | postive  |
| ATRX     | ARRDC1-AS1 | -0.45012 | 7.09E-25 | negative |
| TNFRSF1B | LINC00649  | 0.401983 | 1.02E-19 | postive  |
| CYLD     | LINC00649  | 0.409501 | 1.80E-20 | postive  |
| CFLAR    | LINC00649  | 0.413319 | 7.36E-21 | postive  |
| TRAF2    | U62317.1   | 0.467103 | 6.70E-27 | postive  |
| TARDBP   | AP000866.6 | 0.453885 | 2.58E-25 | postive  |
| FASLG    | AC004687.1 | 0.45301  | 3.27E-25 | postive  |
| MLKL     | AC004687.1 | 0.448511 | 1.09E-24 | postive  |
| RIPK3    | AC004687.1 | 0.452786 | 3.47E-25 | postive  |
| TNF      | AC004687.1 | 0.628193 | 4.48E-53 | postive  |
| ZBP1     | AC004687.1 | 0.595517 | 1.54E-46 | postive  |
| TNFSF10  | AC004687.1 | 0.455232 | 1.79E-25 | postive  |
| TNFRSF1B | AC004687.1 | 0.565198 | 4.15E-41 | postive  |
| CYLD     | AC004687.1 | 0.591555 | 8.52E-46 | postive  |
| CFLAR    | AC004687.1 | 0.564798 | 4.85E-41 | postive  |
| FLT3     | AC004687.1 | 0.691133 | 3.84E-68 | postive  |

|          |             |          |          |          |
|----------|-------------|----------|----------|----------|
| CD40     | AC004687.1  | 0.630925 | 1.17E-53 | postive  |
| MAP3K7   | AL133338.1  | 0.491042 | 5.92E-30 | postive  |
| FASLG    | TRBV11-2    | 0.65128  | 3.48E-58 | postive  |
| MLKL     | TRBV11-2    | 0.468945 | 3.98E-27 | postive  |
| RIPK3    | TRBV11-2    | 0.496802 | 1.00E-30 | postive  |
| TNF      | TRBV11-2    | 0.470126 | 2.84E-27 | postive  |
| ZBP1     | TRBV11-2    | 0.65366  | 9.74E-59 | postive  |
| TNFSF10  | TRBV11-2    | 0.462907 | 2.17E-26 | postive  |
| TNFRSF1B | TRBV11-2    | 0.736762 | 9.75E-82 | postive  |
| CYLD     | TRBV11-2    | 0.541348 | 3.24E-37 | postive  |
| CFLAR    | TRBV11-2    | 0.529491 | 2.15E-35 | postive  |
| FLT3     | TRBV11-2    | 0.637607 | 4.17E-55 | postive  |
| CD40     | TRBV11-2    | 0.557685 | 7.55E-40 | postive  |
| MAPK8    | FTX         | 0.405021 | 5.09E-20 | postive  |
| SIRT1    | FTX         | 0.475035 | 6.93E-28 | postive  |
| ATRX     | FTX         | 0.569326 | 8.15E-42 | postive  |
| CYLD     | AC025279.1  | 0.42112  | 1.14E-21 | postive  |
| FLT3     | AC025279.1  | 0.60656  | 1.16E-48 | postive  |
| BACH2    | AC025279.1  | 0.486394 | 2.42E-29 | postive  |
| CD40     | AC025279.1  | 0.45499  | 1.91E-25 | postive  |
| RIPK3    | AC007728.3  | 0.421138 | 1.13E-21 | postive  |
| FLT3     | AC007998.3  | 0.550534 | 1.12E-38 | postive  |
| SIRT3    | NAPA-AS1    | 0.404442 | 5.81E-20 | postive  |
| MAP3K7   | NAPA-AS1    | -0.40716 | 3.11E-20 | negative |
| TARDBP   | N4BP2L2-IT2 | 0.476832 | 4.11E-28 | postive  |
| ATRX     | AC024075.1  | 0.469033 | 3.88E-27 | postive  |
| TNFRSF1A | LINC00941   | 0.495945 | 1.31E-30 | postive  |
| AXL      | LINC00941   | 0.491202 | 5.64E-30 | postive  |
| TARDBP   | AL355488.1  | 0.52175  | 3.05E-34 | postive  |
| FASLG    | AL590764.1  | 0.698536 | 3.58E-70 | postive  |
| MLKL     | AL590764.1  | 0.591666 | 8.12E-46 | postive  |
| RIPK3    | AL590764.1  | 0.56508  | 4.34E-41 | postive  |
| TNF      | AL590764.1  | 0.552742 | 4.90E-39 | postive  |
| CASP8    | AL590764.1  | 0.419538 | 1.67E-21 | postive  |
| ZBP1     | AL590764.1  | 0.784455 | 2.31E-99 | postive  |
| TNFSF10  | AL590764.1  | 0.615121 | 2.28E-50 | postive  |
| TNFRSF1B | AL590764.1  | 0.810458 | #####    | postive  |
| CYLD     | AL590764.1  | 0.690043 | 7.56E-68 | postive  |
| CFLAR    | AL590764.1  | 0.6653   | 1.64E-61 | postive  |
| FLT3     | AL590764.1  | 0.757423 | 7.19E-89 | postive  |
| CD40     | AL590764.1  | 0.706621 | 1.84E-72 | postive  |
| ZBP1     | AC244205.1  | 0.631132 | 1.06E-53 | postive  |
| FASLG    | AL162414.1  | 0.804855 | #####    | postive  |
| MLKL     | AL162414.1  | 0.544886 | 8.97E-38 | postive  |



|          |            |          |          |          |
|----------|------------|----------|----------|----------|
| ZBP1     | AL162414.1 | 0.623046 | 5.40E-52 | postive  |
| TNFSF10  | AL162414.1 | 0.643783 | 1.77E-56 | postive  |
| TNFRSF1B | AL162414.1 | 0.746766 | 4.19E-85 | postive  |
| CYLD     | AL162414.1 | 0.577087 | 3.60E-43 | postive  |
| CFLAR    | AL162414.1 | 0.585848 | 9.59E-45 | postive  |
| FLT3     | AL162414.1 | 0.441259 | 7.30E-24 | postive  |
| CD40     | AL162414.1 | 0.504931 | 7.71E-32 | postive  |
| RNF31    | AL604028.1 | -0.48082 | 1.28E-28 | negative |
| TNF      | AL844908.1 | 0.457532 | 9.58E-26 | postive  |
| ZBP1     | AL844908.1 | 0.456065 | 1.43E-25 | postive  |
| CYLD     | AL844908.1 | 0.426199 | 3.29E-22 | postive  |
| CFLAR    | AL844908.1 | 0.409875 | 1.65E-20 | postive  |
| FLT3     | AL844908.1 | 0.558908 | 4.73E-40 | postive  |
| CD40     | AL844908.1 | 0.492962 | 3.29E-30 | postive  |
| MAPK8    | AC022400.4 | 0.454714 | 2.06E-25 | postive  |
| IPMK     | AC022400.4 | 0.496469 | 1.11E-30 | postive  |
| SIRT1    | AC022400.4 | 0.4783   | 2.68E-28 | postive  |
| DNMT1    | AL161891.1 | 0.485442 | 3.22E-29 | postive  |
| SIRT1    | AL731563.3 | 0.404245 | 6.08E-20 | postive  |
| MLKL     | PRKCQ-AS1  | 0.408609 | 2.22E-20 | postive  |
| TNF      | PRKCQ-AS1  | 0.434515 | 4.11E-23 | postive  |
| ZBP1     | PRKCQ-AS1  | 0.472203 | 1.57E-27 | postive  |
| TNFRSF1B | PRKCQ-AS1  | 0.494031 | 2.37E-30 | postive  |
| CYLD     | PRKCQ-AS1  | 0.486693 | 2.21E-29 | postive  |
| CFLAR    | PRKCQ-AS1  | 0.428354 | 1.93E-22 | postive  |
| FLT3     | PRKCQ-AS1  | 0.590356 | 1.42E-45 | postive  |
| CD40     | PRKCQ-AS1  | 0.519412 | 6.71E-34 | postive  |
| FASLG    | AC005082.1 | 0.412561 | 8.80E-21 | postive  |
| ZBP1     | AC005082.1 | 0.438023 | 1.68E-23 | postive  |
| TNFRSF1B | AC005082.1 | 0.55014  | 1.29E-38 | postive  |
| FADD     | AC012640.1 | 0.407495 | 2.87E-20 | postive  |
| TARDBP   | AC005104.1 | 0.535709 | 2.44E-36 | postive  |
| SIRT3    | AL355001.2 | 0.434416 | 4.22E-23 | postive  |
| FASLG    | AC010175.1 | 0.442784 | 4.91E-24 | postive  |
| TNFRSF1B | AC010175.1 | 0.402955 | 8.16E-20 | postive  |
| CYLD     | AC010175.1 | 0.432814 | 6.32E-23 | postive  |
| FASLG    | AP002954.1 | 0.550915 | 9.70E-39 | postive  |
| RIPK3    | AP002954.1 | 0.494878 | 1.82E-30 | postive  |
| ZBP1     | AP002954.1 | 0.483317 | 6.09E-29 | postive  |
| TNFRSF1B | AP002954.1 | 0.637584 | 4.22E-55 | postive  |
| RIPK1    | GMDS-DT    | 0.410853 | 1.31E-20 | postive  |
| MLKL     | AC010327.4 | 0.418343 | 2.23E-21 | postive  |
| AXL      | AC010327.4 | 0.479397 | 1.94E-28 | postive  |
| RIPK3    | LINC01503  | 0.418975 | 1.91E-21 | postive  |

|          |             |          |          |          |
|----------|-------------|----------|----------|----------|
| FASLG    | AC099343.2  | 0.562616 | 1.13E-40 | postive  |
| MLKL     | AC099343.2  | 0.433099 | 5.89E-23 | postive  |
| CASP8    | AC099343.2  | 0.418859 | 1.97E-21 | postive  |
| ZBP1     | AC099343.2  | 0.550623 | 1.08E-38 | postive  |
| TNFSF10  | AC099343.2  | 0.528055 | 3.54E-35 | postive  |
| TNFRSF1B | AC099343.2  | 0.480632 | 1.35E-28 | postive  |
| CYLD     | AC099343.2  | 0.504126 | 9.97E-32 | postive  |
| CFLAR    | AC099343.2  | 0.523298 | 1.81E-34 | postive  |
| ZBP1     | AC023510.2  | 0.522037 | 2.77E-34 | postive  |
| TNFSF10  | AC023510.2  | 0.406293 | 3.79E-20 | postive  |
| TNFRSF1B | AC023510.2  | 0.47924  | 2.03E-28 | postive  |
| CYLD     | AC023510.2  | 0.601478 | 1.13E-47 | postive  |
| CFLAR    | AC023510.2  | 0.547635 | 3.27E-38 | postive  |
| FLT3     | AC023510.2  | 0.633374 | 3.48E-54 | postive  |
| BACH2    | AC023510.2  | 0.478908 | 2.24E-28 | postive  |
| CD40     | AC023510.2  | 0.58934  | 2.19E-45 | postive  |
| GATA3    | AC068831.5  | 0.528591 | 2.94E-35 | postive  |
| EGFR     | MIR2117HG   | 0.485679 | 3.00E-29 | postive  |
| TARDBP   | ANKRD10-IT1 | 0.430026 | 1.27E-22 | postive  |
| BCL2     | AC012313.5  | 0.411737 | 1.07E-20 | postive  |
| STAT3    | SNHG25      | -0.41616 | 3.75E-21 | negative |
| SIRT3    | AL118558.3  | 0.403659 | 6.95E-20 | postive  |
| DIABLO   | AC097359.2  | 0.501855 | 2.05E-31 | postive  |
| PLK1     | AC093010.2  | -0.41142 | 1.15E-20 | negative |
| TNF      | AC244034.2  | 0.444194 | 3.40E-24 | postive  |
| TNFRSF1B | AC244034.2  | 0.418772 | 2.01E-21 | postive  |
| FLT3     | AC244034.2  | 0.460493 | 4.25E-26 | postive  |
| CD40     | AC244034.2  | 0.448538 | 1.08E-24 | postive  |
| TRIM11   | AC016888.1  | 0.468872 | 4.06E-27 | postive  |
| RNF31    | AC016888.1  | 0.414434 | 5.66E-21 | postive  |
| MAPK8    | AL359922.2  | 0.413287 | 7.42E-21 | postive  |
| RNF31    | AC125807.2  | 0.423079 | 7.07E-22 | postive  |
| SIRT3    | AP004609.3  | 0.443445 | 4.14E-24 | postive  |
| GATA3    | AC005476.2  | 0.406443 | 3.67E-20 | postive  |
| TARDBP   | AC245060.5  | 0.448893 | 9.84E-25 | postive  |
| DDX58    | NRIR        | 0.499747 | 3.99E-31 | postive  |
| SIRT3    | ZBED5-AS1   | 0.536584 | 1.79E-36 | postive  |
| TNFSF10  | AL121839.2  | 0.41394  | 6.36E-21 | postive  |
| CYLD     | AL121839.2  | 0.458276 | 7.82E-26 | postive  |
| CFLAR    | AL121839.2  | 0.408822 | 2.11E-20 | postive  |
| GATA3    | AL121839.2  | 0.401209 | 1.21E-19 | postive  |
| TNF      | LINC00324   | 0.417116 | 2.99E-21 | postive  |
| TNFRSF1B | LINC00324   | 0.406489 | 3.63E-20 | postive  |
| CYLD     | LINC00324   | 0.447633 | 1.38E-24 | postive  |

|          |            |          |          |         |
|----------|------------|----------|----------|---------|
| FLT3     | LINC00324  | 0.455966 | 1.47E-25 | postive |
| SIRT1    | AL021368.2 | 0.429704 | 1.38E-22 | postive |
| ATRX     | AL021368.2 | 0.402948 | 8.17E-20 | postive |
| FASLG    | AC018755.4 | 0.403446 | 7.30E-20 | postive |
| MLKL     | AC018755.4 | 0.42935  | 1.51E-22 | postive |
| RIPK3    | AC018755.4 | 0.435784 | 2.98E-23 | postive |
| TNF      | AC018755.4 | 0.435389 | 3.30E-23 | postive |
| ZBP1     | AC018755.4 | 0.538873 | 7.90E-37 | postive |
| TNFSF10  | AC018755.4 | 0.439648 | 1.11E-23 | postive |
| TNFRSF1B | AC018755.4 | 0.631978 | 6.96E-54 | postive |
| CYLD     | AC018755.4 | 0.530213 | 1.68E-35 | postive |
| CFLAR    | AC018755.4 | 0.545697 | 6.67E-38 | postive |
| FLT3     | AC018755.4 | 0.643371 | 2.19E-56 | postive |
| CD40     | AC018755.4 | 0.595413 | 1.61E-46 | postive |
| STUB1    | Z92544.1   | 0.41618  | 3.73E-21 | postive |
| MAPK8    | ZNF32-AS2  | 0.505472 | 6.48E-32 | postive |
| SIRT1    | ZNF32-AS2  | 0.449999 | 7.33E-25 | postive |
| BACH2    | AL118505.1 | 0.528222 | 3.34E-35 | postive |
| GATA3    | AL118505.1 | 0.904265 | #####    | postive |
| MYCN     | AL118505.1 | 0.717515 | 1.13E-75 | postive |
| GATA3    | AL031058.1 | 0.530646 | 1.44E-35 | postive |
| MYCN     | AL031058.1 | 0.40976  | 1.70E-20 | postive |
| BACH2    | AC068473.3 | 0.492855 | 3.40E-30 | postive |
| GATA3    | AC068473.3 | 0.739167 | 1.56E-82 | postive |
| MYCN     | AC068473.3 | 0.570718 | 4.69E-42 | postive |
| MAPK8    | LINC01772  | 0.40607  | 3.99E-20 | postive |
| GATA3    | MIR200CHG  | 0.464879 | 1.25E-26 | postive |
| TRIM11   | AL162377.1 | 0.451975 | 4.32E-25 | postive |
| TNF      | IFNG-AS1   | 0.445621 | 2.34E-24 | postive |
| ZBP1     | IFNG-AS1   | 0.61167  | 1.13E-49 | postive |
| TNFSF10  | IFNG-AS1   | 0.482135 | 8.65E-29 | postive |
| TNFRSF1B | IFNG-AS1   | 0.523465 | 1.71E-34 | postive |
| CYLD     | IFNG-AS1   | 0.571392 | 3.58E-42 | postive |
| CFLAR    | IFNG-AS1   | 0.506282 | 5.00E-32 | postive |
| FLT3     | IFNG-AS1   | 0.613815 | 4.19E-50 | postive |
| CD40     | IFNG-AS1   | 0.562141 | 1.36E-40 | postive |
| MLKL     | AC078883.1 | 0.46781  | 5.49E-27 | postive |
| CASP8    | AC078883.1 | 0.40495  | 5.17E-20 | postive |
| ZBP1     | AC078883.1 | 0.607119 | 8.99E-49 | postive |
| CYLD     | AC078883.1 | 0.455389 | 1.72E-25 | postive |
| CFLAR    | AC078883.1 | 0.453412 | 2.93E-25 | postive |
| FASLG    | AC008760.2 | 0.427358 | 2.47E-22 | postive |
| TNFRSF1B | AC008760.2 | 0.529062 | 2.50E-35 | postive |
| TRIM11   | SNHG11     | 0.436578 | 2.43E-23 | postive |

|          |            |          |          |          |
|----------|------------|----------|----------|----------|
| SIRT3    | SNHG11     | 0.422478 | 8.19E-22 | postive  |
| CYLD     | SNHG11     | -0.42161 | 1.01E-21 | negative |
| RIPK3    | AC129492.1 | 0.421571 | 1.02E-21 | postive  |
| BACH2    | AC004706.1 | 0.554094 | 2.95E-39 | postive  |
| GATA3    | AC004706.1 | 0.55973  | 3.45E-40 | postive  |
| GATA3    | SOX21-AS1  | 0.746398 | 5.61E-85 | postive  |
| MYCN     | SOX21-AS1  | 0.500575 | 3.07E-31 | postive  |
| CYLD     | EBLN3P     | 0.438224 | 1.60E-23 | postive  |
| SIRT1    | EBLN3P     | 0.432947 | 6.12E-23 | postive  |
| ATRX     | EBLN3P     | 0.438297 | 1.57E-23 | postive  |
| BRAF     | AC000123.1 | 0.429601 | 1.42E-22 | postive  |
| TARDBP   | AC000123.1 | 0.424362 | 5.17E-22 | postive  |
| GATA3    | AC110619.1 | 0.635397 | 1.27E-54 | postive  |
| MYCN     | AC110619.1 | 0.517215 | 1.40E-33 | postive  |
| DNMT1    | AC099850.3 | 0.488812 | 1.17E-29 | postive  |
| HAT1     | AC099850.3 | 0.477672 | 3.22E-28 | postive  |
| PLK1     | AC099850.3 | 0.514906 | 3.01E-33 | postive  |
| TRAF2    | AC147067.1 | 0.455198 | 1.81E-25 | postive  |
| TRIM11   | AC002398.1 | 0.445838 | 2.21E-24 | postive  |
| TRAF2    | AC002398.1 | 0.441672 | 6.56E-24 | postive  |
| ATRX     | AC002398.1 | -0.47265 | 1.38E-27 | negative |
| TARDBP   | AP4B1-AS1  | 0.455917 | 1.49E-25 | postive  |
| BCL2     | AL033381.2 | 0.467884 | 5.38E-27 | postive  |
| RIPK3    | AC008555.4 | 0.410029 | 1.59E-20 | postive  |
| TNF      | AC008555.4 | 0.442133 | 5.82E-24 | postive  |
| ZBP1     | AC008555.4 | 0.450321 | 6.73E-25 | postive  |
| TNFRSF1B | AC008555.4 | 0.471314 | 2.02E-27 | postive  |
| CFLAR    | AC008555.4 | 0.416479 | 3.48E-21 | postive  |
| FLT3     | AC008555.4 | 0.606112 | 1.42E-48 | postive  |
| CD40     | AC008555.4 | 0.525875 | 7.50E-35 | postive  |
| TRIM11   | AC136604.2 | 0.401965 | 1.02E-19 | postive  |
| DIABLO   | AC136604.2 | 0.402456 | 9.14E-20 | postive  |
| FASLG    | LINC01871  | 0.81183  | #####    | postive  |
| MLKL     | LINC01871  | 0.543221 | 1.65E-37 | postive  |
| RIPK3    | LINC01871  | 0.448427 | 1.11E-24 | postive  |
| TNF      | LINC01871  | 0.424651 | 4.81E-22 | postive  |
| ZBP1     | LINC01871  | 0.661128 | 1.67E-60 | postive  |
| TNFSF10  | LINC01871  | 0.60529  | 2.05E-48 | postive  |
| TNFRSF1B | LINC01871  | 0.688361 | 2.13E-67 | postive  |
| CYLD     | LINC01871  | 0.478353 | 2.64E-28 | postive  |
| CFLAR    | LINC01871  | 0.525323 | 9.06E-35 | postive  |
| FLT3     | LINC01871  | 0.402485 | 9.08E-20 | postive  |
| CD40     | LINC01871  | 0.520588 | 4.52E-34 | postive  |
| TRIM11   | AC006504.5 | 0.404328 | 5.96E-20 | postive  |

|          |            |          |          |          |
|----------|------------|----------|----------|----------|
| TNFSF10  | AC006504.5 | -0.41669 | 3.30E-21 | negative |
| DIABLO   | AC006504.5 | 0.403302 | 7.54E-20 | postive  |
| BCL2     | AC027097.2 | 0.427347 | 2.48E-22 | postive  |
| AXL      | HS1BP3-IT1 | 0.484229 | 4.64E-29 | postive  |
| FASLG    | LINC02362  | 0.471503 | 1.92E-27 | postive  |
| MLKL     | LINC02362  | 0.431888 | 7.98E-23 | postive  |
| ZBP1     | LINC02362  | 0.754857 | 6.04E-88 | postive  |
| TNFSF10  | LINC02362  | 0.407148 | 3.12E-20 | postive  |
| TNFRSF1B | LINC02362  | 0.440209 | 9.59E-24 | postive  |
| CYLD     | LINC02362  | 0.439038 | 1.30E-23 | postive  |
| CFLAR    | LINC02362  | 0.458409 | 7.54E-26 | postive  |
| CD40     | LINC02362  | 0.433275 | 5.63E-23 | postive  |
| ATRX     | AL049869.2 | 0.429827 | 1.34E-22 | postive  |
| TARDBP   | AC095057.3 | 0.492764 | 3.49E-30 | postive  |
| CYLD     | LINC02422  | 0.461021 | 3.67E-26 | postive  |
| CFLAR    | LINC02422  | 0.431834 | 8.09E-23 | postive  |
| FLT3     | LINC02422  | 0.486637 | 2.25E-29 | postive  |
| BACH2    | LINC02422  | 0.401756 | 1.07E-19 | postive  |
| CD40     | LINC02422  | 0.526821 | 5.42E-35 | postive  |
| ATRX     | ATP2A1-AS1 | -0.41594 | 3.95E-21 | negative |
| GATA3    | CALML3-AS1 | 0.504167 | 9.84E-32 | postive  |
| MLKL     | AC010247.1 | 0.497729 | 7.51E-31 | postive  |
| ZBP1     | AC010247.1 | 0.417272 | 2.88E-21 | postive  |
| TNFRSF1B | AC010247.1 | 0.470569 | 2.51E-27 | postive  |
| CYLD     | AC010247.1 | 0.422948 | 7.30E-22 | postive  |
| FLT3     | AC010247.1 | 0.506612 | 4.50E-32 | postive  |
| CD40     | AC010247.1 | 0.481981 | 9.05E-29 | postive  |
| RIPK3    | LINC02361  | 0.455462 | 1.68E-25 | postive  |
| TNF      | LINC02361  | 0.439782 | 1.07E-23 | postive  |
| TNFRSF1B | LINC02361  | 0.416453 | 3.50E-21 | postive  |
| FLT3     | LINC02361  | 0.459577 | 5.47E-26 | postive  |
| ATRX     | AC010834.3 | 0.507639 | 3.23E-32 | postive  |
| FASLG    | LINC00861  | 0.404096 | 6.29E-20 | postive  |
| MLKL     | LINC00861  | 0.424578 | 4.90E-22 | postive  |
| RIPK3    | LINC00861  | 0.409948 | 1.62E-20 | postive  |
| TNF      | LINC00861  | 0.496697 | 1.04E-30 | postive  |
| CASP8    | LINC00861  | 0.444007 | 3.57E-24 | postive  |
| ZBP1     | LINC00861  | 0.554835 | 2.23E-39 | postive  |
| TNFSF10  | LINC00861  | 0.493509 | 2.78E-30 | postive  |
| TNFRSF1B | LINC00861  | 0.587652 | 4.49E-45 | postive  |
| CYLD     | LINC00861  | 0.718223 | 6.89E-76 | postive  |
| CFLAR    | LINC00861  | 0.61618  | 1.39E-50 | postive  |
| FLT3     | LINC00861  | 0.762992 | 6.47E-91 | postive  |
| BACH2    | LINC00861  | 0.412094 | 9.83E-21 | postive  |

|          |            |          |          |         |
|----------|------------|----------|----------|---------|
| CD40     | LINC00861  | 0.651371 | 3.31E-58 | postive |
| CYLD     | AC005332.7 | 0.461963 | 2.83E-26 | postive |
| CFLAR    | AC005332.7 | 0.404671 | 5.51E-20 | postive |
| FLT3     | AC005332.7 | 0.470128 | 2.84E-27 | postive |
| BACH2    | AC005332.7 | 0.40537  | 4.69E-20 | postive |
| CD40     | AC005332.7 | 0.423718 | 6.05E-22 | postive |
| GATA3    | AC080038.2 | 0.55445  | 2.58E-39 | postive |
| MYCN     | AC080038.2 | 0.480388 | 1.45E-28 | postive |
| BCL2     | SPART-AS1  | 0.406952 | 3.26E-20 | postive |
| FASLG    | AC002091.2 | 0.421929 | 9.36E-22 | postive |
| RIPK3    | AC002091.2 | 0.458134 | 8.13E-26 | postive |
| ZBP1     | AC002091.2 | 0.569261 | 8.37E-42 | postive |
| TNFRSF1B | AC002091.2 | 0.650788 | 4.51E-58 | postive |
| FLT3     | AC002091.2 | 0.51264  | 6.35E-33 | postive |
| FASLG    | AC007728.2 | 0.664205 | 3.02E-61 | postive |
| MLKL     | AC007728.2 | 0.569958 | 6.35E-42 | postive |
| RIPK3    | AC007728.2 | 0.524768 | 1.10E-34 | postive |
| TNF      | AC007728.2 | 0.528081 | 3.51E-35 | postive |
| CASP8    | AC007728.2 | 0.453951 | 2.54E-25 | postive |
| ZBP1     | AC007728.2 | 0.716676 | 2.02E-75 | postive |
| TNFSF10  | AC007728.2 | 0.633458 | 3.34E-54 | postive |
| TNFRSF1B | AC007728.2 | 0.792318 | #####    | postive |
| CYLD     | AC007728.2 | 0.744861 | 1.88E-84 | postive |
| CFLAR    | AC007728.2 | 0.698125 | 4.66E-70 | postive |
| FLT3     | AC007728.2 | 0.741315 | 2.99E-83 | postive |
| CD40     | AC007728.2 | 0.689217 | 1.26E-67 | postive |
| ZBP1     | LINC01353  | 0.415782 | 4.11E-21 | postive |
| TNFSF10  | AC009950.1 | 0.437932 | 1.72E-23 | postive |
| CYLD     | AC009950.1 | 0.535995 | 2.20E-36 | postive |
| CFLAR    | AC009950.1 | 0.430363 | 1.17E-22 | postive |
| FLT3     | AC009950.1 | 0.425682 | 3.74E-22 | postive |
| DDX58    | AC009950.1 | 0.668953 | 2.07E-62 | postive |
| TRIM11   | AL139288.1 | 0.434875 | 3.76E-23 | postive |
| TARDBP   | LINC01355  | 0.51995  | 5.60E-34 | postive |
| FASLG    | AL133371.2 | 0.42038  | 1.36E-21 | postive |
| MLKL     | AL133371.2 | 0.439737 | 1.08E-23 | postive |
| RIPK3    | AL133371.2 | 0.430047 | 1.27E-22 | postive |
| TNF      | AL133371.2 | 0.457993 | 8.45E-26 | postive |
| ZBP1     | AL133371.2 | 0.534883 | 3.26E-36 | postive |
| TNFSF10  | AL133371.2 | 0.491584 | 5.02E-30 | postive |
| TNFRSF1B | AL133371.2 | 0.65545  | 3.71E-59 | postive |
| CYLD     | AL133371.2 | 0.615048 | 2.36E-50 | postive |
| CFLAR    | AL133371.2 | 0.571501 | 3.43E-42 | postive |
| FLT3     | AL133371.2 | 0.682735 | 6.53E-66 | postive |

|          |            |          |          |          |
|----------|------------|----------|----------|----------|
| CD40     | AL133371.2 | 0.528889 | 2.65E-35 | postive  |
| MAPK8    | AL353796.1 | 0.520136 | 5.26E-34 | postive  |
| MYC      | SNHG29     | 0.452985 | 3.29E-25 | postive  |
| SIRT1    | SNHG29     | 0.403793 | 6.74E-20 | postive  |
| FASLG    | AC008105.2 | 0.470928 | 2.26E-27 | postive  |
| MLKL     | AC008105.2 | 0.503785 | 1.11E-31 | postive  |
| RIPK3    | AC008105.2 | 0.436113 | 2.74E-23 | postive  |
| TNF      | AC008105.2 | 0.529733 | 1.98E-35 | postive  |
| CASP8    | AC008105.2 | 0.4063   | 3.79E-20 | postive  |
| ZBP1     | AC008105.2 | 0.596504 | 1.00E-46 | postive  |
| TNFSF10  | AC008105.2 | 0.553785 | 3.31E-39 | postive  |
| TNFRSF1B | AC008105.2 | 0.570528 | 5.06E-42 | postive  |
| CYLD     | AC008105.2 | 0.681789 | 1.15E-65 | postive  |
| CFLAR    | AC008105.2 | 0.584926 | 1.41E-44 | postive  |
| FLT3     | AC008105.2 | 0.678152 | 1.00E-64 | postive  |
| CD40     | AC008105.2 | 0.616477 | 1.21E-50 | postive  |
| DIABLO   | HEXA-AS1   | 0.425396 | 4.01E-22 | postive  |
| RNF31    | AC007038.1 | -0.47158 | 1.88E-27 | negative |
| TARDBP   | AC007038.1 | 0.494927 | 1.79E-30 | postive  |
| IDH2     | DLX6-AS1   | 0.499811 | 3.91E-31 | postive  |
| TARDBP   | PSPC1-AS2  | 0.534926 | 3.21E-36 | postive  |
| SIRT1    | AC018752.1 | 0.475139 | 6.73E-28 | postive  |
| ATRX     | AC018752.1 | 0.543985 | 1.25E-37 | postive  |
| TRIM11   | AC131009.3 | 0.425052 | 4.36E-22 | postive  |
| STAT3    | AC131009.3 | -0.4025  | 9.05E-20 | negative |
| FASLG    | DBH-AS1    | 0.635349 | 1.30E-54 | postive  |
| RIPK3    | DBH-AS1    | 0.415587 | 4.30E-21 | postive  |
| ZBP1     | DBH-AS1    | 0.575237 | 7.63E-43 | postive  |
| TNFSF10  | DBH-AS1    | 0.473839 | 9.80E-28 | postive  |
| TNFRSF1B | DBH-AS1    | 0.597854 | 5.56E-47 | postive  |
| CYLD     | DBH-AS1    | 0.511124 | 1.04E-32 | postive  |
| CFLAR    | DBH-AS1    | 0.530006 | 1.80E-35 | postive  |
| FLT3     | DBH-AS1    | 0.453266 | 3.05E-25 | postive  |
| CD40     | DBH-AS1    | 0.541708 | 2.85E-37 | postive  |
| DIABLO   | NRAV       | 0.45603  | 1.44E-25 | postive  |
| TRIM11   | AC008915.2 | 0.433256 | 5.66E-23 | postive  |
| CYLD     | AC008915.2 | -0.42083 | 1.22E-21 | negative |
| STUB1    | AC008915.2 | 0.430189 | 1.22E-22 | postive  |
| ATRX     | AC008915.2 | -0.41093 | 1.29E-20 | negative |
| SIRT1    | OIP5-AS1   | 0.47017  | 2.81E-27 | postive  |
| ATRX     | OIP5-AS1   | 0.495154 | 1.67E-30 | postive  |
| FASLG    | MIR155HG   | 0.633261 | 3.68E-54 | postive  |
| MLKL     | MIR155HG   | 0.442008 | 6.01E-24 | postive  |
| ZBP1     | MIR155HG   | 0.491851 | 4.62E-30 | postive  |

|          |            |          |          |          |
|----------|------------|----------|----------|----------|
| TNFSF10  | MIR155HG   | 0.512686 | 6.25E-33 | postive  |
| TNFRSF1B | MIR155HG   | 0.507623 | 3.25E-32 | postive  |
| CYLD     | MIR155HG   | 0.521399 | 3.44E-34 | postive  |
| CFLAR    | MIR155HG   | 0.455127 | 1.85E-25 | postive  |
| CD40     | MIR155HG   | 0.435797 | 2.97E-23 | postive  |
| SIRT1    | AC011912.1 | 0.405841 | 4.21E-20 | postive  |
| OTULIN   | EGFR-AS1   | 0.482305 | 8.22E-29 | postive  |
| SIRT1    | AC008669.1 | 0.475703 | 5.71E-28 | postive  |
| RIPK3    | TNK2-AS1   | 0.426096 | 3.38E-22 | postive  |
| ZBP1     | TNK2-AS1   | 0.517742 | 1.17E-33 | postive  |
| TNFRSF1B | TNK2-AS1   | 0.495776 | 1.38E-30 | postive  |
| CFLAR    | TNK2-AS1   | 0.409538 | 1.79E-20 | postive  |
| FLT3     | TNK2-AS1   | 0.520523 | 4.62E-34 | postive  |
| TRIM11   | AC109322.1 | 0.410111 | 1.56E-20 | postive  |
| TRAF2    | AC109322.1 | 0.400811 | 1.33E-19 | postive  |
| ATRX     | AC109322.1 | -0.40711 | 3.14E-20 | negative |
| DIABLO   | UBAC2-AS1  | 0.418254 | 2.27E-21 | postive  |
| TRIM11   | NDUFB2-AS1 | 0.441534 | 6.80E-24 | postive  |
| ATRX     | NDUFB2-AS1 | -0.44146 | 6.94E-24 | negative |
| FLT3     | LINC00243  | 0.456666 | 1.21E-25 | postive  |
| ATRX     | AC025917.1 | 0.458026 | 8.37E-26 | postive  |
| EGFR     | KRT7-AS    | 0.452861 | 3.41E-25 | postive  |
| TARDBP   | AL928654.2 | 0.41577  | 4.12E-21 | postive  |
| FASLG    | AC011899.2 | 0.515132 | 2.79E-33 | postive  |
| RIPK3    | AC011899.2 | 0.466243 | 8.54E-27 | postive  |
| ZBP1     | AC011899.2 | 0.510857 | 1.14E-32 | postive  |
| TNFRSF1B | AC011899.2 | 0.614029 | 3.79E-50 | postive  |
| MYC      | AC012615.4 | 0.429348 | 1.51E-22 | postive  |
| FAS      | AC015911.3 | 0.414148 | 6.05E-21 | postive  |
| FASLG    | AC015911.3 | 0.76194  | 1.59E-90 | postive  |
| MLKL     | AC015911.3 | 0.496219 | 1.20E-30 | postive  |
| TNF      | AC015911.3 | 0.42797  | 2.12E-22 | postive  |
| ZBP1     | AC015911.3 | 0.627524 | 6.21E-53 | postive  |
| TNFSF10  | AC015911.3 | 0.683964 | 3.11E-66 | postive  |
| TNFRSF1B | AC015911.3 | 0.654294 | 6.93E-59 | postive  |
| CYLD     | AC015911.3 | 0.687922 | 2.79E-67 | postive  |
| CFLAR    | AC015911.3 | 0.592703 | 5.21E-46 | postive  |
| FLT3     | AC015911.3 | 0.529948 | 1.84E-35 | postive  |
| CD40     | AC015911.3 | 0.472705 | 1.36E-27 | postive  |
| DDX58    | AC015911.3 | 0.412511 | 8.91E-21 | postive  |
| FAS      | TRG-AS1    | 0.478104 | 2.84E-28 | postive  |
| FASLG    | TRG-AS1    | 0.628561 | 3.74E-53 | postive  |
| MLKL     | TRG-AS1    | 0.432973 | 6.08E-23 | postive  |
| CASP8    | TRG-AS1    | 0.411219 | 1.21E-20 | postive  |



|          |            |          |          |         |
|----------|------------|----------|----------|---------|
| ZBP1     | TRG-AS1    | 0.545206 | 7.99E-38 | postive |
| TNFSF10  | TRG-AS1    | 0.509335 | 1.87E-32 | postive |
| TNFRSF1B | TRG-AS1    | 0.598665 | 3.90E-47 | postive |
| CYLD     | TRG-AS1    | 0.544602 | 9.96E-38 | postive |
| CFLAR    | TRG-AS1    | 0.553478 | 3.72E-39 | postive |
| FLT3     | TRG-AS1    | 0.501002 | 2.69E-31 | postive |
| CD40     | TRG-AS1    | 0.505544 | 6.33E-32 | postive |
| FASLG    | AC012236.1 | 0.411947 | 1.02E-20 | postive |
| MLKL     | AC012236.1 | 0.448272 | 1.16E-24 | postive |
| ZBP1     | AC012236.1 | 0.836799 | #####    | postive |
| TNFRSF1B | AC012236.1 | 0.511288 | 9.88E-33 | postive |
| CYLD     | AC012236.1 | 0.450556 | 6.32E-25 | postive |
| CFLAR    | AC012236.1 | 0.505228 | 7.01E-32 | postive |
| FLT3     | AC012236.1 | 0.463405 | 1.89E-26 | postive |
| CD40     | AC012236.1 | 0.574616 | 9.81E-43 | postive |
| ATRX     | Z68871.1   | 0.582668 | 3.62E-44 | postive |
| HSP90AA1 | Z68871.1   | 0.417732 | 2.58E-21 | postive |
| TARDBP   | OCIAD1-AS1 | 0.435607 | 3.12E-23 | postive |
| FLT3     | AC104971.3 | 0.482512 | 7.73E-29 | postive |
| CD40     | AC104971.3 | 0.464074 | 1.57E-26 | postive |
| TNFSF10  | AC138207.1 | 0.42018  | 1.43E-21 | postive |
| DIABLO   | UBL7-AS1   | 0.40461  | 5.59E-20 | postive |
| RIPK1    | HCG18      | 0.446392 | 1.91E-24 | postive |
| SLC39A7  | HCG18      | 0.499472 | 4.35E-31 | postive |
| RNF31    | LINC00638  | 0.429791 | 1.35E-22 | postive |
| FASLG    | C9orf139   | 0.569071 | 9.03E-42 | postive |
| MLKL     | C9orf139   | 0.507609 | 3.26E-32 | postive |
| RIPK3    | C9orf139   | 0.486927 | 2.06E-29 | postive |
| TNF      | C9orf139   | 0.554979 | 2.11E-39 | postive |
| ZBP1     | C9orf139   | 0.634601 | 1.89E-54 | postive |
| TNFSF10  | C9orf139   | 0.549841 | 1.45E-38 | postive |
| TNFRSF1B | C9orf139   | 0.675779 | 4.04E-64 | postive |
| CYLD     | C9orf139   | 0.583391 | 2.68E-44 | postive |
| CFLAR    | C9orf139   | 0.596256 | 1.12E-46 | postive |
| FLT3     | C9orf139   | 0.708554 | 5.07E-73 | postive |
| CD40     | C9orf139   | 0.599554 | 2.64E-47 | postive |
| ATRX     | CR936218.1 | 0.404811 | 5.34E-20 | postive |
| TARDBP   | CR936218.1 | 0.401997 | 1.01E-19 | postive |
| MAP3K7   | HMGN3-AS1  | 0.435424 | 3.27E-23 | postive |
| FASLG    | AL357033.4 | 0.432065 | 7.64E-23 | postive |
| RIPK3    | AL357033.4 | 0.583483 | 2.58E-44 | postive |
| TNF      | AL357033.4 | 0.449985 | 7.36E-25 | postive |
| ZBP1     | AL357033.4 | 0.564083 | 6.41E-41 | postive |
| TNFRSF1B | AL357033.4 | 0.571376 | 3.60E-42 | postive |

|          |            |          |          |          |
|----------|------------|----------|----------|----------|
| CFLAR    | AL357033.4 | 0.450523 | 6.38E-25 | postive  |
| FLT3     | AL357033.4 | 0.50944  | 1.80E-32 | postive  |
| CD40     | AL357033.4 | 0.462361 | 2.53E-26 | postive  |
| TRIM11   | AC139530.1 | 0.450886 | 5.79E-25 | postive  |
| ATRX     | AL683813.1 | 0.4641   | 1.56E-26 | postive  |
| TNF      | AL109914.1 | 0.476101 | 5.09E-28 | postive  |
| ZBP1     | AL109914.1 | 0.416565 | 3.41E-21 | postive  |
| TNFRSF1B | AL109914.1 | 0.440562 | 8.75E-24 | postive  |
| CYLD     | AL109914.1 | 0.535972 | 2.22E-36 | postive  |
| CFLAR    | AL109914.1 | 0.417873 | 2.49E-21 | postive  |
| FLT3     | AL109914.1 | 0.637981 | 3.45E-55 | postive  |
| CD40     | AL109914.1 | 0.507589 | 3.28E-32 | postive  |
| OTULIN   | AC010491.1 | 0.402592 | 8.86E-20 | postive  |
| ATRX     | AP002761.3 | -0.40484 | 5.30E-20 | negative |
| BRAF     | AC087071.2 | 0.477962 | 2.96E-28 | postive  |
| USP22    | AC015922.2 | 0.456064 | 1.43E-25 | postive  |
| FASLG    | AC008750.1 | 0.449954 | 7.42E-25 | postive  |
| MLKL     | AC008750.1 | 0.440273 | 9.43E-24 | postive  |
| RIPK3    | AC008750.1 | 0.416187 | 3.73E-21 | postive  |
| TNF      | AC008750.1 | 0.403197 | 7.72E-20 | postive  |
| ZBP1     | AC008750.1 | 0.49105  | 5.91E-30 | postive  |
| TNFSF10  | AC008750.1 | 0.472358 | 1.50E-27 | postive  |
| TNFRSF1B | AC008750.1 | 0.608732 | 4.32E-49 | postive  |
| CYLD     | AC008750.1 | 0.545185 | 8.05E-38 | postive  |
| CFLAR    | AC008750.1 | 0.519763 | 5.96E-34 | postive  |
| FLT3     | AC008750.1 | 0.558439 | 5.67E-40 | postive  |
| CD40     | AC008750.1 | 0.563184 | 9.10E-41 | postive  |
| FASLG    | LINC02285  | 0.486941 | 2.05E-29 | postive  |
| MLKL     | LINC02285  | 0.471224 | 2.08E-27 | postive  |
| RIPK3    | LINC02285  | 0.528036 | 3.57E-35 | postive  |
| TNF      | LINC02285  | 0.435916 | 2.88E-23 | postive  |
| ZBP1     | LINC02285  | 0.559531 | 3.73E-40 | postive  |
| TNFSF10  | LINC02285  | 0.458222 | 7.93E-26 | postive  |
| TNFRSF1B | LINC02285  | 0.730897 | 7.80E-80 | postive  |
| CYLD     | LINC02285  | 0.52285  | 2.10E-34 | postive  |
| CFLAR    | LINC02285  | 0.519581 | 6.34E-34 | postive  |
| FLT3     | LINC02285  | 0.648298 | 1.68E-57 | postive  |
| CD40     | LINC02285  | 0.56155  | 1.71E-40 | postive  |
| FASLG    | AL683807.1 | 0.475525 | 6.01E-28 | postive  |
| MLKL     | AL683807.1 | 0.481785 | 9.59E-29 | postive  |
| RIPK3    | AL683807.1 | 0.414765 | 5.23E-21 | postive  |
| TNF      | AL683807.1 | 0.531187 | 1.19E-35 | postive  |
| CASP8    | AL683807.1 | 0.426913 | 2.76E-22 | postive  |
| ZBP1     | AL683807.1 | 0.555111 | 2.01E-39 | postive  |

|          |            |          |          |         |
|----------|------------|----------|----------|---------|
| TNFSF10  | AL683807.1 | 0.530517 | 1.51E-35 | postive |
| TNFRSF1B | AL683807.1 | 0.545084 | 8.35E-38 | postive |
| CYLD     | AL683807.1 | 0.644611 | 1.15E-56 | postive |
| CFLAR    | AL683807.1 | 0.580879 | 7.60E-44 | postive |
| FLT3     | AL683807.1 | 0.596743 | 9.04E-47 | postive |
| CD40     | AL683807.1 | 0.581626 | 5.58E-44 | postive |
| TARDBP   | AC073655.2 | 0.400229 | 1.51E-19 | postive |
| FASLG    | LINC00954  | 0.407569 | 2.83E-20 | postive |
| ZBP1     | LINC00954  | 0.408851 | 2.10E-20 | postive |
| TNFSF10  | LINC00954  | 0.419488 | 1.69E-21 | postive |
| TNFRSF1B | LINC00954  | 0.508463 | 2.47E-32 | postive |
| CYLD     | LINC00954  | 0.52972  | 1.99E-35 | postive |
| CFLAR    | LINC00954  | 0.489413 | 9.73E-30 | postive |
| FLT3     | LINC00954  | 0.506277 | 5.01E-32 | postive |
| CD40     | LINC00954  | 0.51296  | 5.71E-33 | postive |
| MAPK8    | AL132656.2 | 0.499996 | 3.69E-31 | postive |
| SIRT1    | AL132656.2 | 0.46541  | 1.08E-26 | postive |
| CYLD     | LINC00926  | 0.469286 | 3.61E-27 | postive |
| CFLAR    | LINC00926  | 0.405697 | 4.35E-20 | postive |
| FLT3     | LINC00926  | 0.549111 | 1.90E-38 | postive |
| BACH2    | LINC00926  | 0.506523 | 4.63E-32 | postive |
| CD40     | LINC00926  | 0.544038 | 1.22E-37 | postive |
| RIPK3    | AC010247.2 | 0.471472 | 1.94E-27 | postive |
| TNF      | AC010247.2 | 0.534322 | 3.98E-36 | postive |
| ZBP1     | AC010247.2 | 0.612119 | 9.16E-50 | postive |
| TNFRSF1B | AC010247.2 | 0.641083 | 7.11E-56 | postive |
| CYLD     | AC010247.2 | 0.538602 | 8.70E-37 | postive |
| CFLAR    | AC010247.2 | 0.502655 | 1.59E-31 | postive |
| FLT3     | AC010247.2 | 0.780326 | 1.15E-97 | postive |
| BACH2    | AC010247.2 | 0.446764 | 1.73E-24 | postive |
| CD40     | AC010247.2 | 0.630231 | 1.65E-53 | postive |
| FASLG    | LINC02446  | 0.761523 | 2.27E-90 | postive |
| MLKL     | LINC02446  | 0.511213 | 1.01E-32 | postive |
| ZBP1     | LINC02446  | 0.621839 | 9.62E-52 | postive |
| TNFSF10  | LINC02446  | 0.587003 | 5.90E-45 | postive |
| TNFRSF1B | LINC02446  | 0.63139  | 9.31E-54 | postive |
| CYLD     | LINC02446  | 0.49396  | 2.42E-30 | postive |
| CFLAR    | LINC02446  | 0.529054 | 2.51E-35 | postive |
| FLT3     | LINC02446  | 0.405196 | 4.88E-20 | postive |
| CD40     | LINC02446  | 0.466703 | 7.50E-27 | postive |
| RIPK3    | AL357033.3 | 0.502349 | 1.75E-31 | postive |
| ZBP1     | AL357033.3 | 0.453163 | 3.14E-25 | postive |
| TNFRSF1B | AL357033.3 | 0.526433 | 6.19E-35 | postive |
| FLT3     | AL357033.3 | 0.476069 | 5.14E-28 | postive |

|          |            |          |          |          |
|----------|------------|----------|----------|----------|
| ATRX     | AC008770.3 | 0.418275 | 2.26E-21 | postive  |
| GATA3    | AC079414.3 | 0.460689 | 4.02E-26 | postive  |
| MYCN     | AC079414.3 | 0.46952  | 3.38E-27 | postive  |
| FASLG    | AC012645.3 | 0.486571 | 2.30E-29 | postive  |
| MLKL     | AC012645.3 | 0.480661 | 1.34E-28 | postive  |
| RIPK3    | AC012645.3 | 0.504621 | 8.51E-32 | postive  |
| TNF      | AC012645.3 | 0.584302 | 1.83E-44 | postive  |
| CASP8    | AC012645.3 | 0.425248 | 4.16E-22 | postive  |
| ZBP1     | AC012645.3 | 0.700101 | 1.31E-70 | postive  |
| TNFSF10  | AC012645.3 | 0.503767 | 1.12E-31 | postive  |
| TNFRSF1B | AC012645.3 | 0.683158 | 5.06E-66 | postive  |
| CYLD     | AC012645.3 | 0.664015 | 3.36E-61 | postive  |
| CFLAR    | AC012645.3 | 0.641175 | 6.79E-56 | postive  |
| FLT3     | AC012645.3 | 0.794073 | #####    | postive  |
| CD40     | AC012645.3 | 0.691139 | 3.83E-68 | postive  |
| FASLG    | AC020659.1 | 0.466939 | 7.02E-27 | postive  |
| MLKL     | AC020659.1 | 0.438337 | 1.55E-23 | postive  |
| RIPK3    | AC020659.1 | 0.405751 | 4.30E-20 | postive  |
| TNF      | AC020659.1 | 0.48308  | 6.53E-29 | postive  |
| CASP8    | AC020659.1 | 0.433762 | 4.98E-23 | postive  |
| ZBP1     | AC020659.1 | 0.552256 | 5.88E-39 | postive  |
| TNFSF10  | AC020659.1 | 0.562548 | 1.16E-40 | postive  |
| TNFRSF1B | AC020659.1 | 0.551108 | 9.03E-39 | postive  |
| CYLD     | AC020659.1 | 0.678031 | 1.08E-64 | postive  |
| CFLAR    | AC020659.1 | 0.616101 | 1.44E-50 | postive  |
| FLT3     | AC020659.1 | 0.648541 | 1.48E-57 | postive  |
| CD40     | AC020659.1 | 0.58645  | 7.45E-45 | postive  |
| BCL2     | GNG12-AS1  | 0.414099 | 6.12E-21 | postive  |
| CD40     | GNG12-AS1  | -0.40734 | 2.98E-20 | negative |
| BACH2    | AL645608.6 | 0.498608 | 5.70E-31 | postive  |
| GATA3    | AL645608.6 | 0.675347 | 5.20E-64 | postive  |
| MYCN     | AL645608.6 | 0.646791 | 3.71E-57 | postive  |
| IDH2     | ZNF710-AS1 | 0.563884 | 6.93E-41 | postive  |
| FASLG    | AC002091.1 | 0.490976 | 6.04E-30 | postive  |
| RIPK3    | AC002091.1 | 0.51938  | 6.78E-34 | postive  |
| TNF      | AC002091.1 | 0.413927 | 6.38E-21 | postive  |
| ZBP1     | AC002091.1 | 0.593511 | 3.68E-46 | postive  |
| TNFRSF1B | AC002091.1 | 0.652673 | 1.65E-58 | postive  |
| FLT3     | AC002091.1 | 0.491766 | 4.75E-30 | postive  |
| CD40     | AC002091.1 | 0.414231 | 5.93E-21 | postive  |
| TNFRSF1B | AC092809.2 | 0.475421 | 6.20E-28 | postive  |
| RIPK3    | AC145098.1 | 0.478278 | 2.70E-28 | postive  |
| TNF      | AC145098.1 | 0.460894 | 3.80E-26 | postive  |
| ZBP1     | AC145098.1 | 0.509523 | 1.76E-32 | postive  |

|          |            |          |          |          |
|----------|------------|----------|----------|----------|
| TNFRSF1B | AC145098.1 | 0.591142 | 1.02E-45 | postive  |
| CFLAR    | AC145098.1 | 0.445268 | 2.57E-24 | postive  |
| FLT3     | AC145098.1 | 0.527734 | 3.96E-35 | postive  |
| CD40     | AC145098.1 | 0.503953 | 1.05E-31 | postive  |
| ZBP1     | AC246787.2 | 0.619842 | 2.48E-51 | postive  |
| TNFRSF1B | AC246787.2 | 0.465286 | 1.12E-26 | postive  |
| CFLAR    | AC246787.2 | 0.404726 | 5.44E-20 | postive  |
| FLT3     | AC246787.2 | 0.517131 | 1.44E-33 | postive  |
| CD40     | AC246787.2 | 0.466993 | 6.92E-27 | postive  |
| BCL2     | TEX41      | 0.485208 | 3.46E-29 | postive  |
| RIPK3    | LINC01857  | 0.460579 | 4.15E-26 | postive  |
| TNF      | LINC01857  | 0.502314 | 1.77E-31 | postive  |
| ZBP1     | LINC01857  | 0.594138 | 2.80E-46 | postive  |
| TNFRSF1B | LINC01857  | 0.593053 | 4.48E-46 | postive  |
| CYLD     | LINC01857  | 0.539751 | 5.76E-37 | postive  |
| CFLAR    | LINC01857  | 0.51737  | 1.33E-33 | postive  |
| FLT3     | LINC01857  | 0.706108 | 2.58E-72 | postive  |
| BACH2    | LINC01857  | 0.458611 | 7.13E-26 | postive  |
| CD40     | LINC01857  | 0.667374 | 5.08E-62 | postive  |
| RNF31    | AC120053.1 | -0.43595 | 2.86E-23 | negative |
| FAS      | AC079015.1 | 0.426756 | 2.87E-22 | postive  |
| FASLG    | AC079015.1 | 0.751298 | 1.11E-86 | postive  |
| MLKL     | AC079015.1 | 0.428387 | 1.91E-22 | postive  |
| ZBP1     | AC079015.1 | 0.53337  | 5.56E-36 | postive  |
| TNFSF10  | AC079015.1 | 0.591626 | 8.27E-46 | postive  |
| TNFRSF1B | AC079015.1 | 0.627656 | 5.82E-53 | postive  |
| CYLD     | AC079015.1 | 0.611382 | 1.29E-49 | postive  |
| CFLAR    | AC079015.1 | 0.577355 | 3.23E-43 | postive  |
| FLT3     | AC079015.1 | 0.457593 | 9.42E-26 | postive  |
| CD40     | AC079015.1 | 0.414953 | 5.00E-21 | postive  |
| TNFRSF1B | IL10RB-DT  | 0.41317  | 7.63E-21 | postive  |
| SIRT3    | FOXN3-AS1  | 0.423219 | 6.83E-22 | postive  |
| MAP3K7   | FOXN3-AS1  | -0.40228 | 9.51E-20 | negative |
| GATA3    | AC010503.4 | 0.580475 | 8.97E-44 | postive  |
| BACH2    | LINC02247  | 0.441948 | 6.11E-24 | postive  |
| GATA3    | LINC02247  | 0.879743 | #####    | postive  |
| MYCN     | LINC02247  | 0.612764 | 6.81E-50 | postive  |
| GATA3    | PGM5-AS1   | 0.419714 | 1.60E-21 | postive  |
| FASLG    | AC108134.3 | 0.647277 | 2.88E-57 | postive  |
| MLKL     | AC108134.3 | 0.552417 | 5.53E-39 | postive  |
| RIPK3    | AC108134.3 | 0.467519 | 5.96E-27 | postive  |
| TNF      | AC108134.3 | 0.466402 | 8.17E-27 | postive  |
| ZBP1     | AC108134.3 | 0.630289 | 1.60E-53 | postive  |
| TNFSF10  | AC108134.3 | 0.643363 | 2.20E-56 | postive  |

|          |            |          |          |          |
|----------|------------|----------|----------|----------|
| TNFRSF1B | AC108134.3 | 0.672505 | 2.71E-63 | postive  |
| CYLD     | AC108134.3 | 0.571821 | 3.02E-42 | postive  |
| CFLAR    | AC108134.3 | 0.584774 | 1.50E-44 | postive  |
| FLT3     | AC108134.3 | 0.520239 | 5.08E-34 | postive  |
| CD40     | AC108134.3 | 0.541156 | 3.48E-37 | postive  |
| PLK1     | AC012073.1 | 0.55207  | 6.30E-39 | postive  |
| FASLG    | AC006369.1 | 0.461462 | 3.25E-26 | postive  |
| MLKL     | AC006369.1 | 0.420185 | 1.43E-21 | postive  |
| RIPK3    | AC006369.1 | 0.419903 | 1.53E-21 | postive  |
| TNF      | AC006369.1 | 0.464821 | 1.27E-26 | postive  |
| ZBP1     | AC006369.1 | 0.573613 | 1.47E-42 | postive  |
| TNFSF10  | AC006369.1 | 0.445615 | 2.34E-24 | postive  |
| TNFRSF1B | AC006369.1 | 0.600021 | 2.15E-47 | postive  |
| CYLD     | AC006369.1 | 0.555317 | 1.86E-39 | postive  |
| CFLAR    | AC006369.1 | 0.500612 | 3.04E-31 | postive  |
| FLT3     | AC006369.1 | 0.694363 | 5.08E-69 | postive  |
| CD40     | AC006369.1 | 0.537697 | 1.20E-36 | postive  |
| FASLG    | PSMB8-AS1  | 0.499231 | 4.69E-31 | postive  |
| MLKL     | PSMB8-AS1  | 0.45596  | 1.47E-25 | postive  |
| TNF      | PSMB8-AS1  | 0.471297 | 2.04E-27 | postive  |
| CASP8    | PSMB8-AS1  | 0.414222 | 5.95E-21 | postive  |
| ZBP1     | PSMB8-AS1  | 0.619413 | 3.04E-51 | postive  |
| TNFSF10  | PSMB8-AS1  | 0.504754 | 8.16E-32 | postive  |
| TNFRSF1B | PSMB8-AS1  | 0.554024 | 3.03E-39 | postive  |
| CYLD     | PSMB8-AS1  | 0.64307  | 2.56E-56 | postive  |
| CFLAR    | PSMB8-AS1  | 0.583816 | 2.25E-44 | postive  |
| FLT3     | PSMB8-AS1  | 0.563197 | 9.05E-41 | postive  |
| CD40     | PSMB8-AS1  | 0.552263 | 5.86E-39 | postive  |
| TARDBP   | AC026471.1 | -0.40837 | 2.34E-20 | negative |
| TRIM11   | AL121944.1 | 0.409598 | 1.76E-20 | postive  |
| TRIM11   | AC012313.1 | 0.437049 | 2.16E-23 | postive  |
| RNF31    | AC012313.1 | 0.458775 | 6.82E-26 | postive  |
| BACH2    | CRIM1-DT   | 0.447931 | 1.27E-24 | postive  |
| GATA3    | CRIM1-DT   | 0.732816 | 1.88E-80 | postive  |
| MYCN     | CRIM1-DT   | 0.614339 | 3.28E-50 | postive  |
| TNFRSF1B | AL035530.1 | 0.410638 | 1.38E-20 | postive  |
| TARDBP   | AC105339.2 | 0.414912 | 5.05E-21 | postive  |
| FASLG    | AC008083.3 | 0.659736 | 3.59E-60 | postive  |
| MLKL     | AC008083.3 | 0.517852 | 1.13E-33 | postive  |
| RIPK3    | AC008083.3 | 0.419856 | 1.55E-21 | postive  |
| TNF      | AC008083.3 | 0.440642 | 8.57E-24 | postive  |
| ZBP1     | AC008083.3 | 0.698754 | 3.12E-70 | postive  |
| TNFSF10  | AC008083.3 | 0.604897 | 2.45E-48 | postive  |
| TNFRSF1B | AC008083.3 | 0.7253   | 4.59E-78 | postive  |

|          |             |          |          |         |
|----------|-------------|----------|----------|---------|
| CYLD     | AC008083.3  | 0.66579  | 1.24E-61 | postive |
| CFLAR    | AC008083.3  | 0.661172 | 1.63E-60 | postive |
| FLT3     | AC008083.3  | 0.651381 | 3.29E-58 | postive |
| CD40     | AC008083.3  | 0.606262 | 1.32E-48 | postive |
| FASLG    | LINC00528   | 0.498111 | 6.66E-31 | postive |
| MLKL     | LINC00528   | 0.519557 | 6.39E-34 | postive |
| RIPK3    | LINC00528   | 0.494709 | 1.92E-30 | postive |
| TNF      | LINC00528   | 0.540277 | 4.77E-37 | postive |
| CASP8    | LINC00528   | 0.435985 | 2.83E-23 | postive |
| ZBP1     | LINC00528   | 0.719634 | 2.57E-76 | postive |
| TNFSF10  | LINC00528   | 0.516927 | 1.54E-33 | postive |
| TNFRSF1B | LINC00528   | 0.662783 | 6.67E-61 | postive |
| CYLD     | LINC00528   | 0.645376 | 7.76E-57 | postive |
| CFLAR    | LINC00528   | 0.633099 | 4.00E-54 | postive |
| FLT3     | LINC00528   | 0.728421 | 4.79E-79 | postive |
| CD40     | LINC00528   | 0.697859 | 5.53E-70 | postive |
| SIRT3    | DNAJC27-AS1 | 0.406598 | 3.54E-20 | postive |
| TRIM11   | AC110285.5  | 0.407406 | 2.93E-20 | postive |
| TARDBP   | AC127024.4  | 0.419448 | 1.71E-21 | postive |
| BACH2    | AC008687.3  | 0.460254 | 4.54E-26 | postive |
| GATA3    | AC008687.3  | 0.810476 | #####    | postive |
| MYCN     | AC008687.3  | 0.645251 | 8.28E-57 | postive |
| CYLD     | AC090948.3  | 0.444919 | 2.81E-24 | postive |
| FLT3     | AC090948.3  | 0.472923 | 1.28E-27 | postive |
| CD40     | AC090948.3  | 0.457921 | 8.61E-26 | postive |
| FASLG    | AL157871.2  | 0.505927 | 5.60E-32 | postive |
| DIABLO   | ATXN2-AS    | 0.419725 | 1.60E-21 | postive |
| MYC      | PROSER2-AS1 | 0.405399 | 4.66E-20 | postive |
| MLKL     | AL731567.1  | 0.424509 | 4.98E-22 | postive |
| TNF      | AL731567.1  | 0.516777 | 1.62E-33 | postive |
| CASP8    | AL731567.1  | 0.417322 | 2.84E-21 | postive |
| ZBP1     | AL731567.1  | 0.488625 | 1.24E-29 | postive |
| TNFSF10  | AL731567.1  | 0.441124 | 7.56E-24 | postive |
| TNFRSF1B | AL731567.1  | 0.543874 | 1.30E-37 | postive |
| CYLD     | AL731567.1  | 0.612095 | 9.27E-50 | postive |
| CFLAR    | AL731567.1  | 0.51335  | 5.03E-33 | postive |
| FLT3     | AL731567.1  | 0.626279 | 1.14E-52 | postive |
| CD40     | AL731567.1  | 0.599352 | 2.88E-47 | postive |
| FASLG    | RERE-AS1    | 0.448746 | 1.02E-24 | postive |
| MLKL     | RERE-AS1    | 0.453581 | 2.80E-25 | postive |
| TNF      | RERE-AS1    | 0.40533  | 4.74E-20 | postive |
| CASP8    | RERE-AS1    | 0.416036 | 3.86E-21 | postive |
| ZBP1     | RERE-AS1    | 0.540281 | 4.76E-37 | postive |
| TNFSF10  | RERE-AS1    | 0.479682 | 1.79E-28 | postive |

|          |              |          |          |          |
|----------|--------------|----------|----------|----------|
| TNFRSF1B | RERE-AS1     | 0.511647 | 8.79E-33 | postive  |
| CYLD     | RERE-AS1     | 0.606819 | 1.03E-48 | postive  |
| CFLAR    | RERE-AS1     | 0.578827 | 1.77E-43 | postive  |
| FLT3     | RERE-AS1     | 0.583517 | 2.54E-44 | postive  |
| CD40     | RERE-AS1     | 0.577792 | 2.70E-43 | postive  |
| BACH2    | LINC00640    | 0.504522 | 8.78E-32 | postive  |
| GATA3    | LINC00640    | 0.908111 | #####    | postive  |
| MYCN     | LINC00640    | 0.696467 | 1.34E-69 | postive  |
| TRAF2    | NPTN-IT1     | -0.4016  | 1.11E-19 | negative |
| ATRX     | NPTN-IT1     | 0.504236 | 9.63E-32 | postive  |
| ATRX     | CHKB-DT      | -0.40186 | 1.05E-19 | negative |
| FASLG    | AC007991.2   | 0.579529 | 1.32E-43 | postive  |
| ZBP1     | AC007991.2   | 0.427445 | 2.42E-22 | postive  |
| TNFSF10  | AC007991.2   | 0.493199 | 3.06E-30 | postive  |
| CYLD     | AC007991.2   | 0.413697 | 6.73E-21 | postive  |
| CFLAR    | AC007991.2   | 0.424632 | 4.84E-22 | postive  |
| CYLD     | AL021707.8   | 0.46129  | 3.41E-26 | postive  |
| GATA3    | AC087491.1   | 0.533997 | 4.46E-36 | postive  |
| MYCN     | AC087491.1   | 0.427458 | 2.41E-22 | postive  |
| MAPK8    | AL139407.1   | 0.404718 | 5.45E-20 | postive  |
| IPMK     | AL139407.1   | 0.432201 | 7.38E-23 | postive  |
| RIPK3    | LINC02132    | 0.451566 | 4.82E-25 | postive  |
| TNF      | LINC02132    | 0.509699 | 1.66E-32 | postive  |
| ZBP1     | LINC02132    | 0.551842 | 6.87E-39 | postive  |
| TNFRSF1B | LINC02132    | 0.560296 | 2.78E-40 | postive  |
| CYLD     | LINC02132    | 0.51973  | 6.03E-34 | postive  |
| CFLAR    | LINC02132    | 0.470081 | 2.88E-27 | postive  |
| FLT3     | LINC02132    | 0.772219 | 1.96E-94 | postive  |
| BACH2    | LINC02132    | 0.484628 | 4.11E-29 | postive  |
| CD40     | LINC02132    | 0.615692 | 1.75E-50 | postive  |
| TRIM11   | PXN-AS1      | 0.4056   | 4.45E-20 | postive  |
| DIABLO   | PXN-AS1      | 0.492468 | 3.83E-30 | postive  |
| DIABLO   | ATP6V1B1-AS1 | 0.427695 | 2.27E-22 | postive  |
| USP22    | AC087294.1   | 0.420897 | 1.20E-21 | postive  |
| TARDBP   | AP002907.1   | 0.407768 | 2.70E-20 | postive  |
| FAS      | BHLHE40-AS1  | 0.406896 | 3.30E-20 | postive  |
| FASLG    | BHLHE40-AS1  | 0.782432 | 1.59E-98 | postive  |
| MLKL     | BHLHE40-AS1  | 0.447744 | 1.34E-24 | postive  |
| ZBP1     | BHLHE40-AS1  | 0.523598 | 1.63E-34 | postive  |
| TNFSF10  | BHLHE40-AS1  | 0.627633 | 5.88E-53 | postive  |
| TNFRSF1B | BHLHE40-AS1  | 0.675794 | 4.00E-64 | postive  |
| CYLD     | BHLHE40-AS1  | 0.57757  | 2.95E-43 | postive  |
| CFLAR    | BHLHE40-AS1  | 0.540063 | 5.15E-37 | postive  |



|          |             |          |          |         |
|----------|-------------|----------|----------|---------|
| CD40     | BHLHE40-AS1 | 0.431735 | 8.30E-23 | postive |
| TARDBP   | AC010976.1  | 0.503134 | 1.37E-31 | postive |
| ATRX     | AC004112.1  | 0.464365 | 1.45E-26 | postive |
| FLT3     | AC103858.1  | 0.521533 | 3.29E-34 | postive |
| TARDBP   | AC021078.1  | 0.431545 | 8.70E-23 | postive |
| IPMK     | GK-AS1      | 0.401524 | 1.13E-19 | postive |
| FASLG    | LINC00539   | 0.604826 | 2.53E-48 | postive |
| ZBP1     | LINC00539   | 0.447031 | 1.61E-24 | postive |
| TNFSF10  | LINC00539   | 0.418446 | 2.17E-21 | postive |
| TNFRSF1B | LINC00539   | 0.444251 | 3.35E-24 | postive |
| CYLD     | LINC00539   | 0.453744 | 2.68E-25 | postive |
| CFLAR    | LINC00539   | 0.481869 | 9.36E-29 | postive |
| ID1      | AL121904.1  | 0.417931 | 2.46E-21 | postive |
| FASLG    | HCP5        | 0.515818 | 2.23E-33 | postive |
| ZBP1     | HCP5        | 0.490396 | 7.21E-30 | postive |
| TNFSF10  | HCP5        | 0.527779 | 3.90E-35 | postive |
| TNFRSF1B | HCP5        | 0.482547 | 7.65E-29 | postive |
| CYLD     | HCP5        | 0.542364 | 2.25E-37 | postive |
| CFLAR    | HCP5        | 0.491678 | 4.87E-30 | postive |
| FLT3     | HCP5        | 0.413502 | 7.05E-21 | postive |
| BACH2    | AC034206.1  | 0.51351  | 4.77E-33 | postive |
| GATA3    | AC034206.1  | 0.879392 | #####    | postive |
| MYCN     | AC034206.1  | 0.689819 | 8.68E-68 | postive |
| TARDBP   | AC109460.2  | 0.464084 | 1.57E-26 | postive |
| MLKL     | FAM30A      | 0.434542 | 4.09E-23 | postive |
| RIPK3    | FAM30A      | 0.413009 | 7.92E-21 | postive |
| TNF      | FAM30A      | 0.506977 | 4.00E-32 | postive |
| ZBP1     | FAM30A      | 0.754793 | 6.37E-88 | postive |
| TNFSF10  | FAM30A      | 0.401154 | 1.23E-19 | postive |
| TNFRSF1B | FAM30A      | 0.559301 | 4.07E-40 | postive |
| CYLD     | FAM30A      | 0.577525 | 3.01E-43 | postive |
| CFLAR    | FAM30A      | 0.561497 | 1.75E-40 | postive |
| FLT3     | FAM30A      | 0.716547 | 2.21E-75 | postive |
| BACH2    | FAM30A      | 0.43715  | 2.10E-23 | postive |
| CD40     | FAM30A      | 0.638973 | 2.09E-55 | postive |
| GATA3    | AL354836.1  | 0.507837 | 3.03E-32 | postive |
| MYCN     | AL354836.1  | 0.491979 | 4.45E-30 | postive |
| MLKL     | AC099524.1  | 0.439453 | 1.16E-23 | postive |
| RIPK3    | AC099524.1  | 0.432831 | 6.30E-23 | postive |
| TNF      | AC099524.1  | 0.455752 | 1.56E-25 | postive |
| ZBP1     | AC099524.1  | 0.719117 | 3.69E-76 | postive |
| TNFRSF1B | AC099524.1  | 0.588259 | 3.47E-45 | postive |
| CYLD     | AC099524.1  | 0.570521 | 5.07E-42 | postive |
| CFLAR    | AC099524.1  | 0.550048 | 1.34E-38 | postive |

|          |            |          |          |          |
|----------|------------|----------|----------|----------|
| FLT3     | AC099524.1 | 0.711734 | 5.96E-74 | postive  |
| BACH2    | AC099524.1 | 0.432768 | 6.40E-23 | postive  |
| CD40     | AC099524.1 | 0.680809 | 2.07E-65 | postive  |
| CYLD     | AC005332.2 | 0.531216 | 1.18E-35 | postive  |
| CFLAR    | AC005332.2 | 0.44771  | 1.35E-24 | postive  |
| FLT3     | AC005332.2 | 0.555953 | 1.46E-39 | postive  |
| BACH2    | AC005332.2 | 0.501557 | 2.25E-31 | postive  |
| CD40     | AC005332.2 | 0.433336 | 5.54E-23 | postive  |
| RIPK3    | MIR3945HG  | 0.422164 | 8.84E-22 | postive  |
| FASLG    | AC090152.1 | 0.469699 | 3.21E-27 | postive  |
| TNFRSF1B | AC090152.1 | 0.426612 | 2.97E-22 | postive  |
| GATA3    | EMX2OS     | 0.411436 | 1.15E-20 | postive  |
| EGFR     | EMX2OS     | 0.413707 | 6.72E-21 | postive  |
| MAPK8    | AP005899.1 | 0.447251 | 1.52E-24 | postive  |
| TRIM11   | AC067852.2 | 0.572307 | 2.48E-42 | postive  |
| SIRT3    | AC067852.2 | 0.41775  | 2.57E-21 | postive  |
| DIABLO   | AC067852.2 | 0.442792 | 4.90E-24 | postive  |
| STUB1    | AC067852.2 | 0.447207 | 1.54E-24 | postive  |
| RNF31    | AC067852.2 | 0.538493 | 9.05E-37 | postive  |
| TARDBP   | AC067852.2 | -0.4699  | 3.03E-27 | negative |
| ATRX     | AC006213.5 | 0.410948 | 1.29E-20 | postive  |
| TRIM11   | IPO9-AS1   | 0.579058 | 1.61E-43 | postive  |
| ATRX     | JARID2-AS1 | -0.41318 | 7.61E-21 | negative |
| FASLG    | AC067945.2 | 0.513309 | 5.10E-33 | postive  |
| MLKL     | AC067945.2 | 0.415217 | 4.70E-21 | postive  |
| ZBP1     | AC067945.2 | 0.508805 | 2.22E-32 | postive  |
| TNFSF10  | AC067945.2 | 0.561506 | 1.74E-40 | postive  |
| TNFRSF1B | AC067945.2 | 0.550857 | 9.91E-39 | postive  |
| CYLD     | AC067945.2 | 0.653837 | 8.86E-59 | postive  |
| CFLAR    | AC067945.2 | 0.557844 | 7.11E-40 | postive  |
| FLT3     | AC067945.2 | 0.596743 | 9.04E-47 | postive  |
| CD40     | AC067945.2 | 0.500308 | 3.34E-31 | postive  |
| FASLG    | AC005083.1 | 0.567829 | 1.47E-41 | postive  |
| ZBP1     | AC005083.1 | 0.479737 | 1.76E-28 | postive  |
| TNFSF10  | AC005083.1 | 0.510797 | 1.16E-32 | postive  |
| TNFRSF1B | AC005083.1 | 0.563545 | 7.91E-41 | postive  |
| CYLD     | AC005083.1 | 0.524475 | 1.21E-34 | postive  |
| CFLAR    | AC005083.1 | 0.472749 | 1.34E-27 | postive  |
| FLT3     | AC005083.1 | 0.433063 | 5.94E-23 | postive  |
| CYLD     | AC025171.4 | 0.40973  | 1.71E-20 | postive  |
| GATA3    | UNC5B-AS1  | 0.660952 | 1.84E-60 | postive  |
| MYCN     | UNC5B-AS1  | 0.421994 | 9.21E-22 | postive  |
| CD40     | AC119396.1 | 0.429059 | 1.62E-22 | postive  |
| ZBP1     | AC008957.1 | 0.497053 | 9.27E-31 | postive  |

|          |            |          |          |          |
|----------|------------|----------|----------|----------|
| TNFSF10  | AC008957.1 | 0.441551 | 6.77E-24 | postive  |
| TNFRSF1B | AC008957.1 | 0.526893 | 5.29E-35 | postive  |
| CYLD     | AC008957.1 | 0.492053 | 4.35E-30 | postive  |
| CFLAR    | AC008957.1 | 0.445656 | 2.32E-24 | postive  |
| FLT3     | AC008957.1 | 0.478512 | 2.52E-28 | postive  |
| CD40     | AC008957.1 | 0.421911 | 9.40E-22 | postive  |
| BCL2     | AL035587.1 | 0.406433 | 3.67E-20 | postive  |
| TARDBP   | PSMA3-AS1  | 0.419275 | 1.78E-21 | postive  |
| FASLG    | LINC00582  | 0.400047 | 1.58E-19 | postive  |
| ZBP1     | LINC00582  | 0.715435 | 4.75E-75 | postive  |
| CD40     | LINC00582  | 0.422909 | 7.37E-22 | postive  |
| TNFSF10  | AC007611.1 | -0.41766 | 2.62E-21 | negative |
| TRIM11   | PCAT6      | 0.445266 | 2.57E-24 | postive  |
| ATRX     | PCAT6      | -0.40904 | 2.01E-20 | negative |
| FASLG    | AL359076.1 | 0.450392 | 6.60E-25 | postive  |
| MLKL     | AL359076.1 | 0.441345 | 7.14E-24 | postive  |
| ZBP1     | AL359076.1 | 0.487323 | 1.83E-29 | postive  |
| TNFSF10  | AL359076.1 | 0.557037 | 9.67E-40 | postive  |
| TNFRSF1B | AL359076.1 | 0.492918 | 3.33E-30 | postive  |
| CYLD     | AL359076.1 | 0.614209 | 3.49E-50 | postive  |
| CFLAR    | AL359076.1 | 0.530489 | 1.52E-35 | postive  |
| FLT3     | AL359076.1 | 0.504922 | 7.73E-32 | postive  |
| CD40     | AL359076.1 | 0.454242 | 2.35E-25 | postive  |
| FASLG    | LINC02084  | 0.654918 | 4.95E-59 | postive  |
| MLKL     | LINC02084  | 0.413915 | 6.40E-21 | postive  |
| RIPK3    | LINC02084  | 0.460774 | 3.93E-26 | postive  |
| ZBP1     | LINC02084  | 0.546637 | 4.73E-38 | postive  |
| TNFSF10  | LINC02084  | 0.407249 | 3.04E-20 | postive  |
| TNFRSF1B | LINC02084  | 0.511756 | 8.48E-33 | postive  |
| CD40     | LINC02084  | 0.441612 | 6.67E-24 | postive  |
| FASLG    | AP003774.2 | 0.624128 | 3.21E-52 | postive  |
| MLKL     | AP003774.2 | 0.527892 | 3.75E-35 | postive  |
| RIPK3    | AP003774.2 | 0.514929 | 2.99E-33 | postive  |
| TNF      | AP003774.2 | 0.481429 | 1.07E-28 | postive  |
| ZBP1     | AP003774.2 | 0.773724 | 5.05E-95 | postive  |
| TNFSF10  | AP003774.2 | 0.497962 | 6.98E-31 | postive  |
| TNFRSF1B | AP003774.2 | 0.738818 | 2.04E-82 | postive  |
| CYLD     | AP003774.2 | 0.574178 | 1.17E-42 | postive  |
| CFLAR    | AP003774.2 | 0.615188 | 2.21E-50 | postive  |
| FLT3     | AP003774.2 | 0.690484 | 5.75E-68 | postive  |
| CD40     | AP003774.2 | 0.670406 | 9.05E-63 | postive  |
| FASLG    | AC009133.3 | 0.591381 | 9.18E-46 | postive  |
| MLKL     | AC009133.3 | 0.491827 | 4.66E-30 | postive  |
| RIPK3    | AC009133.3 | 0.484847 | 3.85E-29 | postive  |

|          |             |          |          |          |
|----------|-------------|----------|----------|----------|
| TNF      | AC009133.3  | 0.549943 | 1.39E-38 | postive  |
| CASP8    | AC009133.3  | 0.443648 | 3.92E-24 | postive  |
| ZBP1     | AC009133.3  | 0.768317 | 6.31E-93 | postive  |
| TNFSF10  | AC009133.3  | 0.569079 | 9.00E-42 | postive  |
| TNFRSF1B | AC009133.3  | 0.741672 | 2.27E-83 | postive  |
| CYLD     | AC009133.3  | 0.723986 | 1.18E-77 | postive  |
| CFLAR    | AC009133.3  | 0.671241 | 5.61E-63 | postive  |
| FLT3     | AC009133.3  | 0.804342 | #####    | postive  |
| CD40     | AC009133.3  | 0.678367 | 8.82E-65 | postive  |
| FAS      | MIAT        | 0.403111 | 7.87E-20 | postive  |
| FASLG    | MIAT        | 0.714653 | 8.14E-75 | postive  |
| MLKL     | MIAT        | 0.492032 | 4.37E-30 | postive  |
| CASP8    | MIAT        | 0.405692 | 4.36E-20 | postive  |
| ZBP1     | MIAT        | 0.635183 | 1.41E-54 | postive  |
| TNFSF10  | MIAT        | 0.621949 | 9.12E-52 | postive  |
| TNFRSF1B | MIAT        | 0.631998 | 6.90E-54 | postive  |
| CYLD     | MIAT        | 0.639668 | 1.47E-55 | postive  |
| CFLAR    | MIAT        | 0.632508 | 5.36E-54 | postive  |
| FLT3     | MIAT        | 0.475703 | 5.71E-28 | postive  |
| CD40     | MIAT        | 0.531308 | 1.14E-35 | postive  |
| TLR3     | PAXIP1-AS2  | 0.439957 | 1.02E-23 | postive  |
| ATRX     | PAXIP1-AS2  | 0.428071 | 2.07E-22 | postive  |
| TSC1     | PPP1R26-AS1 | 0.517165 | 1.42E-33 | postive  |
| SIRT1    | AC090198.1  | 0.410703 | 1.36E-20 | postive  |
| ATRX     | AC090198.1  | 0.420469 | 1.33E-21 | postive  |
| FASLG    | AC023825.2  | 0.45305  | 3.24E-25 | postive  |
| MLKL     | AC023825.2  | 0.514722 | 3.20E-33 | postive  |
| ZBP1     | AC023825.2  | 0.422331 | 8.49E-22 | postive  |
| TNFSF10  | AC023825.2  | 0.468698 | 4.27E-27 | postive  |
| TNFRSF1B | AC023825.2  | 0.407541 | 2.84E-20 | postive  |
| CYLD     | AC023825.2  | 0.480291 | 1.49E-28 | postive  |
| GATA3    | AC245041.2  | 0.633661 | 3.02E-54 | postive  |
| EGFR     | AC245041.2  | 0.412685 | 8.55E-21 | postive  |
| ATRX     | AP000692.2  | -0.43787 | 1.75E-23 | negative |
| FASLG    | AL355916.2  | 0.54816  | 2.70E-38 | postive  |
| ZBP1     | AL355916.2  | 0.409441 | 1.83E-20 | postive  |
| TNFSF10  | AL355916.2  | 0.491854 | 4.62E-30 | postive  |
| TNFRSF1B | AL355916.2  | 0.506074 | 5.34E-32 | postive  |
| CYLD     | AL355916.2  | 0.540188 | 4.93E-37 | postive  |
| CFLAR    | AL355916.2  | 0.51406  | 3.98E-33 | postive  |
| FLT3     | AL355916.2  | 0.419937 | 1.52E-21 | postive  |
| ID1      | AL035425.1  | 0.430343 | 1.18E-22 | postive  |
| CYLD     | VIM-AS1     | 0.434216 | 4.44E-23 | postive  |
| FASLG    | AL158071.3  | 0.696531 | 1.29E-69 | postive  |

|          |            |          |          |          |
|----------|------------|----------|----------|----------|
| MLKL     | AL158071.3 | 0.405707 | 4.34E-20 | postive  |
| ZBP1     | AL158071.3 | 0.504863 | 7.88E-32 | postive  |
| TNFRSF1B | AL158071.3 | 0.566221 | 2.78E-41 | postive  |
| ATRX     | AF241728.1 | 0.431702 | 8.37E-23 | postive  |
| BACH2    | FAM41C     | 0.553097 | 4.29E-39 | postive  |
| GATA3    | FAM41C     | 0.873694 | #####    | postive  |
| MYCN     | FAM41C     | 0.750003 | 3.15E-86 | postive  |
| MAPK8    | AL731577.2 | 0.400334 | 1.48E-19 | postive  |
| SIRT1    | AL731577.2 | 0.49387  | 2.49E-30 | postive  |
| FASLG    | AC003070.1 | 0.498928 | 5.16E-31 | postive  |
| MLKL     | AC003070.1 | 0.456657 | 1.22E-25 | postive  |
| RIPK3    | AC003070.1 | 0.424663 | 4.80E-22 | postive  |
| TNF      | AC003070.1 | 0.471674 | 1.83E-27 | postive  |
| CASP8    | AC003070.1 | 0.411509 | 1.13E-20 | postive  |
| ZBP1     | AC003070.1 | 0.580117 | 1.04E-43 | postive  |
| TNFSF10  | AC003070.1 | 0.564295 | 5.90E-41 | postive  |
| TNFRSF1B | AC003070.1 | 0.604667 | 2.71E-48 | postive  |
| CYLD     | AC003070.1 | 0.676943 | 2.04E-64 | postive  |
| CFLAR    | AC003070.1 | 0.627266 | 7.04E-53 | postive  |
| FLT3     | AC003070.1 | 0.673867 | 1.23E-63 | postive  |
| CD40     | AC003070.1 | 0.576992 | 3.74E-43 | postive  |
| TRIM11   | YTHDF3-AS1 | 0.412971 | 7.99E-21 | postive  |
| MAP3K7   | YTHDF3-AS1 | -0.41315 | 7.66E-21 | negative |
| ATRX     | YTHDF3-AS1 | -0.40725 | 3.04E-20 | negative |
| MAP3K7   | AL359715.2 | 0.492264 | 4.07E-30 | postive  |
| TNFSF10  | AL359220.1 | 0.448288 | 1.16E-24 | postive  |
| TNFRSF1B | AL359220.1 | 0.417279 | 2.87E-21 | postive  |
| CYLD     | AL359220.1 | 0.402726 | 8.60E-20 | postive  |
| CFLAR    | AL359220.1 | 0.407179 | 3.09E-20 | postive  |
| FLT3     | AL359220.1 | 0.440464 | 8.97E-24 | postive  |
| BACH2    | AL359220.1 | 0.423941 | 5.73E-22 | postive  |
| GATA3    | AL359220.1 | 0.557116 | 9.39E-40 | postive  |
| FASLG    | LINC01281  | 0.5369   | 1.60E-36 | postive  |
| MLKL     | LINC01281  | 0.422    | 9.20E-22 | postive  |
| TNF      | LINC01281  | 0.441228 | 7.36E-24 | postive  |
| ZBP1     | LINC01281  | 0.535381 | 2.74E-36 | postive  |
| TNFSF10  | LINC01281  | 0.457469 | 9.75E-26 | postive  |
| TNFRSF1B | LINC01281  | 0.648284 | 1.69E-57 | postive  |
| CYLD     | LINC01281  | 0.561383 | 1.83E-40 | postive  |
| CFLAR    | LINC01281  | 0.505979 | 5.51E-32 | postive  |
| FLT3     | LINC01281  | 0.629005 | 3.01E-53 | postive  |
| CD40     | LINC01281  | 0.523825 | 1.51E-34 | postive  |
| MAPK8    | SNHG1      | 0.402076 | 9.97E-20 | postive  |
| TARDBP   | AC007066.2 | 0.449763 | 7.81E-25 | postive  |

|          |            |          |          |          |
|----------|------------|----------|----------|----------|
| TNFSF10  | CADM3-AS1  | 0.403651 | 6.96E-20 | postive  |
| CYLD     | CADM3-AS1  | 0.496684 | 1.04E-30 | postive  |
| FLT3     | CADM3-AS1  | 0.56923  | 8.47E-42 | postive  |
| ZBP1     | AL121845.4 | 0.410091 | 1.57E-20 | postive  |
| MAP3K7   | AL359715.1 | 0.506738 | 4.32E-32 | postive  |
| GATA3    | AL023284.4 | 0.426195 | 3.29E-22 | postive  |
| TARDBP   | MIR17HG    | 0.485705 | 2.98E-29 | postive  |
| MLKL     | AC100861.1 | 0.497026 | 9.35E-31 | postive  |
| CYLD     | AC100861.1 | 0.404238 | 6.09E-20 | postive  |
| FLT3     | AC100861.1 | 0.419205 | 1.81E-21 | postive  |
| CD40     | AC100861.1 | 0.493055 | 3.20E-30 | postive  |
| TARDBP   | AC011825.2 | 0.421346 | 1.08E-21 | postive  |
| FASLG    | LINC02528  | 0.817196 | #####    | postive  |
| MLKL     | LINC02528  | 0.490368 | 7.27E-30 | postive  |
| ZBP1     | LINC02528  | 0.505656 | 6.11E-32 | postive  |
| TNFSF10  | LINC02528  | 0.630706 | 1.31E-53 | postive  |
| TNFRSF1B | LINC02528  | 0.637376 | 4.68E-55 | postive  |
| CYLD     | LINC02528  | 0.531696 | 1.00E-35 | postive  |
| CFLAR    | LINC02528  | 0.51104  | 1.07E-32 | postive  |
| TRIM11   | FGD5-AS1   | -0.42424 | 5.33E-22 | negative |
| TRAF2    | FGD5-AS1   | -0.44937 | 8.67E-25 | negative |
| MAP3K7   | FGD5-AS1   | 0.433974 | 4.72E-23 | postive  |
| ATRX     | FGD5-AS1   | 0.50139  | 2.38E-31 | postive  |
| TRIM11   | AC114341.1 | 0.412916 | 8.10E-21 | postive  |
| ZBP1     | AC022167.3 | 0.532277 | 8.16E-36 | postive  |
| FLT3     | AC022167.3 | 0.43793  | 1.72E-23 | postive  |
| CD40     | AC022167.3 | 0.410736 | 1.35E-20 | postive  |
| OTULIN   | AL078612.2 | 0.448065 | 1.23E-24 | postive  |
| TRIM11   | ZNF687-AS1 | 0.521282 | 3.58E-34 | postive  |
| DIABLO   | ZNF687-AS1 | 0.410161 | 1.55E-20 | postive  |
| ATRX     | AP000866.1 | 0.408166 | 2.46E-20 | postive  |
| TARDBP   | AC127024.5 | 0.404319 | 5.97E-20 | postive  |
| RIPK3    | AC093278.2 | 0.444586 | 3.07E-24 | postive  |
| TNFRSF1B | AC093278.2 | 0.452842 | 3.42E-25 | postive  |
| FLT3     | AC093278.2 | 0.565096 | 4.32E-41 | postive  |
| BNIP3    | AL162274.1 | 0.524556 | 1.18E-34 | postive  |
| TARDBP   | AC096586.2 | 0.408675 | 2.19E-20 | postive  |
| TRIM11   | AC004221.1 | 0.422773 | 7.62E-22 | postive  |
| CYLD     | AC004221.1 | -0.42586 | 3.57E-22 | negative |
| BCL2     | SNHG16     | 0.412117 | 9.77E-21 | postive  |
| TRIM11   | AC040169.1 | 0.446052 | 2.09E-24 | postive  |
| ATRX     | AC040169.1 | -0.46322 | 1.99E-26 | negative |
| ATRX     | AC004908.1 | 0.422656 | 7.84E-22 | postive  |
| TARDBP   | AC004908.1 | 0.439268 | 1.22E-23 | postive  |

|          |            |          |          |         |
|----------|------------|----------|----------|---------|
| CYLD     | AC016957.2 | 0.432114 | 7.54E-23 | postive |
| CFLAR    | AC016957.2 | 0.439976 | 1.02E-23 | postive |
| FLT3     | AC016957.2 | 0.42243  | 8.28E-22 | postive |
| CD40     | AC016957.2 | 0.464549 | 1.37E-26 | postive |
| ID1      | LINC02593  | 0.415469 | 4.42E-21 | postive |
| BACH2    | LINC02593  | 0.477102 | 3.80E-28 | postive |
| GATA3    | LINC02593  | 0.651941 | 2.44E-58 | postive |
| MYCN     | LINC02593  | 0.591127 | 1.02E-45 | postive |
| EGFR     | LINC02593  | 0.522917 | 2.06E-34 | postive |
| FASLG    | AC131097.3 | 0.462091 | 2.73E-26 | postive |
| TNFRSF1B | AC131097.3 | 0.555344 | 1.84E-39 | postive |
| GATA3    | LINC02568  | 0.519816 | 5.86E-34 | postive |
| MYCN     | LINC02568  | 0.404814 | 5.33E-20 | postive |
| FASLG    | AC243960.1 | 0.417232 | 2.90E-21 | postive |
| MLKL     | AC243960.1 | 0.446716 | 1.75E-24 | postive |
| TNF      | AC243960.1 | 0.491771 | 4.74E-30 | postive |
| CASP8    | AC243960.1 | 0.446987 | 1.63E-24 | postive |
| ZBP1     | AC243960.1 | 0.582487 | 3.90E-44 | postive |
| TNFSF10  | AC243960.1 | 0.4983   | 6.28E-31 | postive |
| TNFRSF1B | AC243960.1 | 0.565108 | 4.30E-41 | postive |
| CYLD     | AC243960.1 | 0.672935 | 2.11E-63 | postive |
| CFLAR    | AC243960.1 | 0.591089 | 1.04E-45 | postive |
| FLT3     | AC243960.1 | 0.682835 | 6.15E-66 | postive |
| CD40     | AC243960.1 | 0.650736 | 4.64E-58 | postive |
| TNFRSF1B | AL161785.1 | 0.443703 | 3.87E-24 | postive |
| MLKL     | SENCR      | 0.431782 | 8.20E-23 | postive |
| RIPK3    | SENCR      | 0.471163 | 2.11E-27 | postive |
| ZBP1     | SENCR      | 0.452329 | 3.93E-25 | postive |
| TNFRSF1B | SENCR      | 0.533636 | 5.06E-36 | postive |
| FADD     | KCTD21-AS1 | 0.466328 | 8.34E-27 | postive |
| FASLG    | AC007569.1 | 0.447288 | 1.51E-24 | postive |
| MLKL     | AC007569.1 | 0.46398  | 1.61E-26 | postive |
| ZBP1     | AC007569.1 | 0.829321 | #####    | postive |
| TNFRSF1B | AC007569.1 | 0.56056  | 2.51E-40 | postive |
| CYLD     | AC007569.1 | 0.504411 | 9.10E-32 | postive |
| CFLAR    | AC007569.1 | 0.553257 | 4.04E-39 | postive |
| FLT3     | AC007569.1 | 0.504709 | 8.28E-32 | postive |
| CD40     | AC007569.1 | 0.504254 | 9.57E-32 | postive |
| MYC      | RBFADN     | 0.416032 | 3.87E-21 | postive |
| ATRX     | Z83843.1   | 0.445416 | 2.47E-24 | postive |
| TARDBP   | Z83843.1   | 0.424542 | 4.95E-22 | postive |
| TRIM11   | SUCLA2-AS1 | 0.464553 | 1.37E-26 | postive |
| FASLG    | AC243829.4 | 0.760428 | 5.75E-90 | postive |
| MLKL     | AC243829.4 | 0.400164 | 1.54E-19 | postive |

|          |             |          |          |          |
|----------|-------------|----------|----------|----------|
| RIPK3    | AC243829.4  | 0.473863 | 9.73E-28 | postive  |
| ZBP1     | AC243829.4  | 0.516247 | 1.93E-33 | postive  |
| TNFSF10  | AC243829.4  | 0.452361 | 3.90E-25 | postive  |
| TNFRSF1B | AC243829.4  | 0.610212 | 2.20E-49 | postive  |
| CFLAR    | AC243829.4  | 0.427846 | 2.19E-22 | postive  |
| FASLG    | TSPOAP1-AS1 | 0.416629 | 3.36E-21 | postive  |
| TNF      | TSPOAP1-AS1 | 0.43056  | 1.11E-22 | postive  |
| ZBP1     | TSPOAP1-AS1 | 0.472682 | 1.37E-27 | postive  |
| TNFRSF1B | TSPOAP1-AS1 | 0.553706 | 3.41E-39 | postive  |
| CYLD     | TSPOAP1-AS1 | 0.494835 | 1.85E-30 | postive  |
| CFLAR    | TSPOAP1-AS1 | 0.460214 | 4.59E-26 | postive  |
| FLT3     | TSPOAP1-AS1 | 0.604449 | 2.99E-48 | postive  |
| CD40     | TSPOAP1-AS1 | 0.446218 | 2.00E-24 | postive  |
| MLKL     | C1RL-AS1    | 0.442687 | 5.04E-24 | postive  |
| CASP8    | C1RL-AS1    | 0.461087 | 3.60E-26 | postive  |
| ZBP1     | C1RL-AS1    | 0.4549   | 1.96E-25 | postive  |
| TNFSF10  | C1RL-AS1    | 0.482395 | 8.01E-29 | postive  |
| TNFRSF1B | C1RL-AS1    | 0.48533  | 3.34E-29 | postive  |
| CYLD     | C1RL-AS1    | 0.561497 | 1.75E-40 | postive  |
| CFLAR    | C1RL-AS1    | 0.490347 | 7.32E-30 | postive  |
| FLT3     | C1RL-AS1    | 0.549071 | 1.93E-38 | postive  |
| CD40     | C1RL-AS1    | 0.517206 | 1.40E-33 | postive  |
| GATA3    | HOXA10-AS   | 0.663082 | 5.65E-61 | postive  |
| MYCN     | HOXA10-AS   | 0.484934 | 3.76E-29 | postive  |
| FASLG    | AL023653.1  | 0.501107 | 2.60E-31 | postive  |
| MLKL     | AL023653.1  | 0.463718 | 1.73E-26 | postive  |
| RIPK3    | AL023653.1  | 0.464969 | 1.22E-26 | postive  |
| TNF      | AL023653.1  | 0.519633 | 6.23E-34 | postive  |
| CASP8    | AL023653.1  | 0.404493 | 5.74E-20 | postive  |
| ZBP1     | AL023653.1  | 0.63847  | 2.69E-55 | postive  |
| TNFSF10  | AL023653.1  | 0.527764 | 3.92E-35 | postive  |
| TNFRSF1B | AL023653.1  | 0.677161 | 1.80E-64 | postive  |
| CYLD     | AL023653.1  | 0.666204 | 9.84E-62 | postive  |
| CFLAR    | AL023653.1  | 0.623762 | 3.83E-52 | postive  |
| FLT3     | AL023653.1  | 0.734436 | 5.62E-81 | postive  |
| CD40     | AL023653.1  | 0.689643 | 9.68E-68 | postive  |
| AXL      | NKILA       | 0.506907 | 4.09E-32 | postive  |
| CYLD     | AL662844.4  | 0.48396  | 5.02E-29 | postive  |
| CFLAR    | AL662844.4  | 0.478223 | 2.74E-28 | postive  |
| FLT3     | AL662844.4  | 0.433026 | 6.00E-23 | postive  |
| CD40     | AL662844.4  | 0.428448 | 1.89E-22 | postive  |
| TARDBP   | LINC01547   | -0.40192 | 1.03E-19 | negative |
| SIRT3    | AC133552.5  | 0.458516 | 7.32E-26 | postive  |
| ATRX     | AC133552.5  | -0.40277 | 8.51E-20 | negative |



|          |            |          |          |         |
|----------|------------|----------|----------|---------|
| FADD     | AP002336.2 | 0.445362 | 2.50E-24 | postive |
| TNFSF10  | LINC01094  | 0.465268 | 1.12E-26 | postive |
| TNFRSF1B | LINC01094  | 0.486334 | 2.47E-29 | postive |
| CYLD     | LINC01094  | 0.437187 | 2.08E-23 | postive |
| AXL      | LINC01094  | 0.44392  | 3.65E-24 | postive |
| DIABLO   | LINC01679  | 0.434789 | 3.84E-23 | postive |
|          | HLA-DQB1-  |          |          |         |
| TNFRSF1B | AS1        | 0.411576 | 1.11E-20 | postive |
|          | HLA-DQB1-  |          |          |         |
| CYLD     | AS1        | 0.429732 | 1.37E-22 | postive |
| AXL      | LINC00460  | 0.437704 | 1.83E-23 | postive |
| ZBP1     | AC242842.1 | 0.406354 | 3.74E-20 | postive |
| CD40     | AC242842.1 | 0.461244 | 3.45E-26 | postive |
| ATRX     | AC009120.3 | 0.42988  | 1.32E-22 | postive |
| TNF      | AC097375.1 | 0.41833  | 2.23E-21 | postive |
| TNFRSF1B | AC097375.1 | 0.470876 | 2.30E-27 | postive |
| CYLD     | AC097375.1 | 0.500533 | 3.11E-31 | postive |
| CFLAR    | AC097375.1 | 0.40513  | 4.96E-20 | postive |
| FLT3     | AC097375.1 | 0.778377 | 7.11E-97 | postive |
| CD40     | AC097375.1 | 0.488366 | 1.34E-29 | postive |
| ATRX     | AC234775.2 | 0.520868 | 4.11E-34 | postive |
| RIPK3    | LINC02158  | 0.497036 | 9.32E-31 | postive |
| TNFRSF1A | AC009509.4 | 0.424816 | 4.62E-22 | postive |
| MLKL     | ITGB2-AS1  | 0.425944 | 3.50E-22 | postive |
| RIPK3    | ITGB2-AS1  | 0.432715 | 6.48E-23 | postive |
| TNF      | ITGB2-AS1  | 0.535827 | 2.34E-36 | postive |
| CASP8    | ITGB2-AS1  | 0.42532  | 4.08E-22 | postive |
| ZBP1     | ITGB2-AS1  | 0.541043 | 3.62E-37 | postive |
| TNFSF10  | ITGB2-AS1  | 0.459314 | 5.88E-26 | postive |
| TNFRSF1B | ITGB2-AS1  | 0.531445 | 1.09E-35 | postive |
| CYLD     | ITGB2-AS1  | 0.616617 | 1.13E-50 | postive |
| CFLAR    | ITGB2-AS1  | 0.582885 | 3.31E-44 | postive |
| FLT3     | ITGB2-AS1  | 0.668699 | 2.40E-62 | postive |
| CD40     | ITGB2-AS1  | 0.637187 | 5.15E-55 | postive |
| GATA3    | LINC01133  | 0.664613 | 2.40E-61 | postive |
| FASLG    | AC243829.1 | 0.488362 | 1.34E-29 | postive |
| TNFRSF1B | AC243829.1 | 0.421351 | 1.08E-21 | postive |
| MAPK8    | AL731566.2 | 0.410389 | 1.47E-20 | postive |
| IPMK     | AL731566.2 | 0.511923 | 8.03E-33 | postive |
| SIRT1    | AL731566.2 | 0.408494 | 2.28E-20 | postive |
| TNFRSF1B | LINC01197  | 0.428274 | 1.97E-22 | postive |
| CYLD     | LINC01197  | 0.425132 | 4.28E-22 | postive |
| FLT3     | LINC01197  | 0.609944 | 2.49E-49 | postive |
| CYLD     | PPP3CB-AS1 | 0.491278 | 5.51E-30 | postive |

|          |            |          |          |          |
|----------|------------|----------|----------|----------|
| CFLAR    | PPP3CB-AS1 | 0.453992 | 2.51E-25 | postive  |
| SIRT1    | PPP3CB-AS1 | 0.426812 | 2.83E-22 | postive  |
| FASLG    | AC005840.4 | 0.467564 | 5.88E-27 | postive  |
| TNF      | AC005840.4 | 0.427743 | 2.25E-22 | postive  |
| ZBP1     | AC005840.4 | 0.462735 | 2.28E-26 | postive  |
| TNFSF10  | AC005840.4 | 0.404256 | 6.06E-20 | postive  |
| CYLD     | AC005840.4 | 0.40236  | 9.34E-20 | postive  |
| CFLAR    | AC005840.4 | 0.405869 | 4.18E-20 | postive  |
| SIRT1    | WDFY3-AS2  | 0.404362 | 5.91E-20 | postive  |
| BACH2    | SNTG2-AS1  | 0.517069 | 1.47E-33 | postive  |
| GATA3    | SNTG2-AS1  | 0.73277  | 1.95E-80 | postive  |
| MYCN     | SNTG2-AS1  | 0.523017 | 1.99E-34 | postive  |
| FASLG    | LINC00996  | 0.434389 | 4.25E-23 | postive  |
| MLKL     | LINC00996  | 0.48461  | 4.14E-29 | postive  |
| RIPK3    | LINC00996  | 0.426575 | 3.00E-22 | postive  |
| TNF      | LINC00996  | 0.500312 | 3.34E-31 | postive  |
| CASP8    | LINC00996  | 0.434941 | 3.69E-23 | postive  |
| ZBP1     | LINC00996  | 0.62817  | 4.53E-53 | postive  |
| TNFSF10  | LINC00996  | 0.531581 | 1.04E-35 | postive  |
| TNFRSF1B | LINC00996  | 0.665731 | 1.28E-61 | postive  |
| CYLD     | LINC00996  | 0.699697 | 1.70E-70 | postive  |
| CFLAR    | LINC00996  | 0.601672 | 1.03E-47 | postive  |
| FLT3     | LINC00996  | 0.811451 | #####    | postive  |
| BACH2    | LINC00996  | 0.401624 | 1.10E-19 | postive  |
| CD40     | LINC00996  | 0.664571 | 2.46E-61 | postive  |
| EGFR     | AL356417.2 | 0.75478  | 6.44E-88 | postive  |
| FASLG    | AC090559.1 | 0.549967 | 1.38E-38 | postive  |
| MLKL     | AC090559.1 | 0.401625 | 1.10E-19 | postive  |
| RIPK3    | AC090559.1 | 0.41663  | 3.35E-21 | postive  |
| TNF      | AC090559.1 | 0.405194 | 4.89E-20 | postive  |
| ZBP1     | AC090559.1 | 0.453877 | 2.59E-25 | postive  |
| TNFSF10  | AC090559.1 | 0.554401 | 2.62E-39 | postive  |
| TNFRSF1B | AC090559.1 | 0.749191 | 6.05E-86 | postive  |
| CYLD     | AC090559.1 | 0.554515 | 2.52E-39 | postive  |
| CFLAR    | AC090559.1 | 0.512829 | 5.96E-33 | postive  |
| FLT3     | AC090559.1 | 0.577757 | 2.74E-43 | postive  |
| PLK1     | AL133215.2 | 0.40167  | 1.09E-19 | postive  |
| FASLG    | MMP25-AS1  | 0.421608 | 1.01E-21 | postive  |
| TNFRSF1B | LINC00892  | 0.452472 | 3.78E-25 | postive  |
| CYLD     | LINC00892  | 0.416432 | 3.52E-21 | postive  |
| FLT3     | LINC00892  | 0.492504 | 3.78E-30 | postive  |
| CD40     | LINC00892  | 0.443478 | 4.10E-24 | postive  |
| ATRX     | AL096828.3 | -0.40339 | 7.39E-20 | negative |
| FASLG    | AL365361.1 | 0.48915  | 1.05E-29 | postive  |

|          |            |          |          |          |
|----------|------------|----------|----------|----------|
| MLKL     | AL365361.1 | 0.472673 | 1.37E-27 | postive  |
| TNF      | AL365361.1 | 0.49783  | 7.27E-31 | postive  |
| CASP8    | AL365361.1 | 0.478271 | 2.70E-28 | postive  |
| ZBP1     | AL365361.1 | 0.701759 | 4.47E-71 | postive  |
| TNFSF10  | AL365361.1 | 0.56393  | 6.81E-41 | postive  |
| TNFRSF1B | AL365361.1 | 0.609062 | 3.72E-49 | postive  |
| CYLD     | AL365361.1 | 0.732129 | 3.14E-80 | postive  |
| CFLAR    | AL365361.1 | 0.638793 | 2.29E-55 | postive  |
| FLT3     | AL365361.1 | 0.697552 | 6.73E-70 | postive  |
| CD40     | AL365361.1 | 0.650142 | 6.36E-58 | postive  |
| EGFR     | LINC02587  | 0.488812 | 1.17E-29 | postive  |
| TRIM11   | NOP14-AS1  | 0.499645 | 4.12E-31 | postive  |
| SIRT3    | NOP14-AS1  | 0.431412 | 9.00E-23 | postive  |
| STUB1    | NOP14-AS1  | 0.44736  | 1.48E-24 | postive  |
| ATRX     | NOP14-AS1  | -0.41211 | 9.79E-21 | negative |
| FASLG    | AC015819.1 | 0.527671 | 4.04E-35 | postive  |
| MLKL     | AC015819.1 | 0.525343 | 9.00E-35 | postive  |
| RIPK3    | AC015819.1 | 0.55828  | 6.02E-40 | postive  |
| TNF      | AC015819.1 | 0.575776 | 6.13E-43 | postive  |
| ZBP1     | AC015819.1 | 0.641784 | 4.97E-56 | postive  |
| TNFSF10  | AC015819.1 | 0.473733 | 1.01E-27 | postive  |
| TNFRSF1B | AC015819.1 | 0.725888 | 3.01E-78 | postive  |
| CYLD     | AC015819.1 | 0.509683 | 1.67E-32 | postive  |
| CFLAR    | AC015819.1 | 0.539432 | 6.46E-37 | postive  |
| FLT3     | AC015819.1 | 0.727949 | 6.76E-79 | postive  |
| CD40     | AC015819.1 | 0.613222 | 5.51E-50 | postive  |
| TARDBP   | NFYC-AS1   | 0.400356 | 1.47E-19 | postive  |
| FAS      | CARD8-AS1  | 0.425542 | 3.87E-22 | postive  |
| TNFSF10  | CARD8-AS1  | 0.423903 | 5.78E-22 | postive  |
| TNFRSF1B | CARD8-AS1  | 0.413331 | 7.34E-21 | postive  |
| CYLD     | CARD8-AS1  | 0.548954 | 2.01E-38 | postive  |
| FLT3     | CARD8-AS1  | 0.508683 | 2.31E-32 | postive  |
| CD40     | CARD8-AS1  | 0.422433 | 8.28E-22 | postive  |
| FASLG    | AC007384.1 | 0.485021 | 3.66E-29 | postive  |
| MLKL     | AC007384.1 | 0.504456 | 8.97E-32 | postive  |
| RIPK3    | AC007384.1 | 0.486455 | 2.38E-29 | postive  |
| TNF      | AC007384.1 | 0.480248 | 1.51E-28 | postive  |
| ZBP1     | AC007384.1 | 0.781963 | 2.47E-98 | postive  |
| TNFSF10  | AC007384.1 | 0.452952 | 3.32E-25 | postive  |
| TNFRSF1B | AC007384.1 | 0.695658 | 2.24E-69 | postive  |
| CYLD     | AC007384.1 | 0.562535 | 1.17E-40 | postive  |
| CFLAR    | AC007384.1 | 0.592433 | 5.85E-46 | postive  |
| FLT3     | AC007384.1 | 0.68685  | 5.39E-67 | postive  |
| CD40     | AC007384.1 | 0.624498 | 2.69E-52 | postive  |

|          |                   |          |          |         |
|----------|-------------------|----------|----------|---------|
| ID1      | LINC02557         | 0.623823 | 3.72E-52 | postive |
| FADD     | AP000487.1        | 0.656594 | 2.00E-59 | postive |
| MLKL     | TNFRSF10A-<br>AS1 | 0.450557 | 6.32E-25 | postive |
| CYLD     | TNFRSF10A-<br>AS1 | 0.445641 | 2.33E-24 | postive |
| ATRX     | AP003392.1        | 0.412786 | 8.35E-21 | postive |
| FASLG    | AL135818.1        | 0.851263 | #####    | postive |
| MLKL     | AL135818.1        | 0.580451 | 9.06E-44 | postive |
| RIPK3    | AL135818.1        | 0.571994 | 2.82E-42 | postive |
| TNF      | AL135818.1        | 0.526669 | 5.71E-35 | postive |
| ZBP1     | AL135818.1        | 0.74561  | 1.05E-84 | postive |
| TNFSF10  | AL135818.1        | 0.627785 | 5.47E-53 | postive |
| TNFRSF1B | AL135818.1        | 0.819991 | #####    | postive |
| CYLD     | AL135818.1        | 0.568731 | 1.03E-41 | postive |
| CFLAR    | AL135818.1        | 0.605661 | 1.74E-48 | postive |
| FLT3     | AL135818.1        | 0.589884 | 1.74E-45 | postive |
| CD40     | AL135818.1        | 0.574576 | 9.97E-43 | postive |
| RIPK3    | AC124248.1        | 0.407    | 3.22E-20 | postive |
| BACH2    | AL390719.2        | 0.477327 | 3.56E-28 | postive |
| GATA3    | AL390719.2        | 0.891437 | #####    | postive |
| MYCN     | AL390719.2        | 0.680109 | 3.14E-65 | postive |
| FLT3     | AC055822.1        | 0.43382  | 4.91E-23 | postive |
| CD40     | AC055822.1        | 0.451143 | 5.40E-25 | postive |
| FASLG    | AC022706.1        | 0.628456 | 3.94E-53 | postive |
| MLKL     | AC022706.1        | 0.556695 | 1.10E-39 | postive |
| RIPK3    | AC022706.1        | 0.573523 | 1.52E-42 | postive |
| TNF      | AC022706.1        | 0.566594 | 2.40E-41 | postive |
| ZBP1     | AC022706.1        | 0.678703 | 7.23E-65 | postive |
| TNFSF10  | AC022706.1        | 0.541092 | 3.56E-37 | postive |
| TNFRSF1B | AC022706.1        | 0.720662 | 1.25E-76 | postive |
| CYLD     | AC022706.1        | 0.536399 | 1.91E-36 | postive |
| CFLAR    | AC022706.1        | 0.550384 | 1.18E-38 | postive |
| FLT3     | AC022706.1        | 0.641054 | 7.22E-56 | postive |
| CD40     | AC022706.1        | 0.670175 | 1.03E-62 | postive |
| MLKL     | LINC02576         | 0.412276 | 9.42E-21 | postive |
| ZBP1     | LINC02576         | 0.743024 | 7.94E-84 | postive |
| TNFRSF1B | LINC02576         | 0.485363 | 3.30E-29 | postive |
| CYLD     | LINC02576         | 0.541644 | 2.91E-37 | postive |
| CFLAR    | LINC02576         | 0.533849 | 4.70E-36 | postive |
| FLT3     | LINC02576         | 0.581692 | 5.43E-44 | postive |
| CD40     | LINC02576         | 0.587831 | 4.16E-45 | postive |
| FASLG    | AC025171.5        | 0.469252 | 3.65E-27 | postive |
| MLKL     | AC025171.5        | 0.450062 | 7.21E-25 | postive |

|          |            |          |          |          |
|----------|------------|----------|----------|----------|
| TNF      | AC025171.5 | 0.414131 | 6.08E-21 | postive  |
| ZBP1     | AC025171.5 | 0.583521 | 2.54E-44 | postive  |
| TNFSF10  | AC025171.5 | 0.458264 | 7.84E-26 | postive  |
| TNFRSF1B | AC025171.5 | 0.589975 | 1.67E-45 | postive  |
| CYLD     | AC025171.5 | 0.580008 | 1.09E-43 | postive  |
| CFLAR    | AC025171.5 | 0.587095 | 5.67E-45 | postive  |
| FLT3     | AC025171.5 | 0.623815 | 3.73E-52 | postive  |
| CD40     | AC025171.5 | 0.530212 | 1.68E-35 | postive  |
| FASLG    | LINC01943  | 0.831916 | #####    | postive  |
| MLKL     | LINC01943  | 0.538945 | 7.69E-37 | postive  |
| RIPK3    | LINC01943  | 0.456504 | 1.27E-25 | postive  |
| TNF      | LINC01943  | 0.401796 | 1.06E-19 | postive  |
| ZBP1     | LINC01943  | 0.622264 | 7.85E-52 | postive  |
| TNFSF10  | LINC01943  | 0.567546 | 1.65E-41 | postive  |
| TNFRSF1B | LINC01943  | 0.722814 | 2.72E-77 | postive  |
| CYLD     | LINC01943  | 0.459761 | 5.20E-26 | postive  |
| CFLAR    | LINC01943  | 0.513115 | 5.43E-33 | postive  |
| FLT3     | LINC01943  | 0.402499 | 9.05E-20 | postive  |
| CD40     | LINC01943  | 0.480944 | 1.23E-28 | postive  |
| BACH2    | AL645608.2 | 0.414704 | 5.31E-21 | postive  |
| GATA3    | AL645608.2 | 0.555309 | 1.86E-39 | postive  |
| MYCN     | AL645608.2 | 0.544638 | 9.83E-38 | postive  |
| FASLG    | Z82188.2   | 0.444716 | 2.97E-24 | postive  |
| CYLD     | U62631.1   | 0.420595 | 1.29E-21 | postive  |
| FLT3     | U62631.1   | 0.45838  | 7.60E-26 | postive  |
| CD40     | U62631.1   | 0.417001 | 3.07E-21 | postive  |
| FASLG    | AC004585.1 | 0.52464  | 1.14E-34 | postive  |
| MLKL     | AC004585.1 | 0.430098 | 1.25E-22 | postive  |
| RIPK3    | AC004585.1 | 0.456257 | 1.36E-25 | postive  |
| TNF      | AC004585.1 | 0.510663 | 1.21E-32 | postive  |
| ZBP1     | AC004585.1 | 0.589129 | 2.40E-45 | postive  |
| TNFSF10  | AC004585.1 | 0.502098 | 1.90E-31 | postive  |
| TNFRSF1B | AC004585.1 | 0.641325 | 6.29E-56 | postive  |
| CYLD     | AC004585.1 | 0.641767 | 5.01E-56 | postive  |
| CFLAR    | AC004585.1 | 0.565416 | 3.81E-41 | postive  |
| FLT3     | AC004585.1 | 0.666649 | 7.65E-62 | postive  |
| CD40     | AC004585.1 | 0.612097 | 9.26E-50 | postive  |
| TRIM11   | AP003068.1 | 0.406694 | 3.46E-20 | postive  |
| SIRT3    | AP003068.1 | 0.446932 | 1.66E-24 | postive  |
| TRAF2    | AP003068.1 | 0.419197 | 1.81E-21 | postive  |
| ATRX     | AP003068.1 | -0.44248 | 5.32E-24 | negative |
| FASLG    | LINC01678  | 0.405273 | 4.80E-20 | postive  |
| RIPK3    | LINC01678  | 0.436368 | 2.57E-23 | postive  |
| ZBP1     | LINC01678  | 0.417513 | 2.72E-21 | postive  |

|          |             |          |          |         |
|----------|-------------|----------|----------|---------|
| TNFRSF1B | LINC01678   | 0.479385 | 1.95E-28 | postive |
| TNFSF10  | HSD11B1-AS1 | 0.41754  | 2.70E-21 | postive |
| TNFRSF1B | HSD11B1-AS1 | 0.422263 | 8.63E-22 | postive |
| TRIM11   | AL034346.1  | 0.451332 | 5.14E-25 | postive |
| FASLG    | AC026369.3  | 0.807559 | #####    | postive |
| MLKL     | AC026369.3  | 0.437368 | 1.99E-23 | postive |
| RIPK3    | AC026369.3  | 0.402573 | 8.90E-20 | postive |
| ZBP1     | AC026369.3  | 0.557596 | 7.82E-40 | postive |
| TNFSF10  | AC026369.3  | 0.526526 | 6.00E-35 | postive |
| TNFRSF1B | AC026369.3  | 0.646481 | 4.36E-57 | postive |
| CYLD     | AC026369.3  | 0.422469 | 8.21E-22 | postive |
| CFLAR    | AC026369.3  | 0.495543 | 1.48E-30 | postive |
| CD40     | AC026369.3  | 0.448359 | 1.13E-24 | postive |
| CD40     | RRN3P2      | 0.464785 | 1.29E-26 | postive |
| TNFRSF1B | AL109741.1  | 0.498916 | 5.18E-31 | postive |
| FLT3     | AL109741.1  | 0.668496 | 2.69E-62 | postive |
| CD40     | AL109741.1  | 0.453616 | 2.78E-25 | postive |
| TARDBP   | AL354733.3  | 0.412991 | 7.96E-21 | postive |
| FASLG    | AL022067.1  | 0.496611 | 1.06E-30 | postive |
| MLKL     | AL022067.1  | 0.506294 | 4.98E-32 | postive |
| ZBP1     | AL022067.1  | 0.665698 | 1.31E-61 | postive |
| TNFSF10  | AL022067.1  | 0.443957 | 3.62E-24 | postive |
| TNFRSF1B | AL022067.1  | 0.451222 | 5.29E-25 | postive |
| CYLD     | AL022067.1  | 0.438578 | 1.46E-23 | postive |
| CFLAR    | AL022067.1  | 0.4664   | 8.17E-27 | postive |
| CD40     | AL022067.1  | 0.41947  | 1.70E-21 | postive |
| FASLG    | AC023590.1  | 0.448586 | 1.07E-24 | postive |
| MLKL     | AC023590.1  | 0.431021 | 9.92E-23 | postive |
| TNF      | AC023590.1  | 0.401208 | 1.21E-19 | postive |
| ZBP1     | AC023590.1  | 0.553852 | 3.23E-39 | postive |
| TNFSF10  | AC023590.1  | 0.484141 | 4.76E-29 | postive |
| TNFRSF1B | AC023590.1  | 0.63201  | 6.85E-54 | postive |
| CYLD     | AC023590.1  | 0.578389 | 2.11E-43 | postive |
| CFLAR    | AC023590.1  | 0.534711 | 3.47E-36 | postive |
| FLT3     | AC023590.1  | 0.625246 | 1.87E-52 | postive |
| CD40     | AC023590.1  | 0.634157 | 2.36E-54 | postive |
| FASLG    | LINC01806   | 0.41352  | 7.02E-21 | postive |
| RIPK3    | LINC01806   | 0.472818 | 1.32E-27 | postive |
| ZBP1     | LINC01806   | 0.464665 | 1.33E-26 | postive |
| TNFSF10  | LINC01806   | 0.566131 | 2.88E-41 | postive |
| TNFRSF1B | LINC01806   | 0.482601 | 7.53E-29 | postive |
| CYLD     | LINC01806   | 0.474945 | 7.12E-28 | postive |
| CFLAR    | LINC01806   | 0.487122 | 1.95E-29 | postive |
| FLT3     | LINC01806   | 0.499329 | 4.55E-31 | postive |

|          |            |          |          |         |
|----------|------------|----------|----------|---------|
| BACH2    | LINC01806  | 0.482566 | 7.61E-29 | postive |
| GATA3    | LINC01806  | 0.689577 | 1.01E-67 | postive |
| CD40     | LINC01806  | 0.428148 | 2.03E-22 | postive |
| GATA3    | MIR205HG   | 0.752032 | 6.10E-87 | postive |
| MYCN     | MIR205HG   | 0.450049 | 7.24E-25 | postive |
| FASLG    | LINC02416  | 0.84067  | #####    | postive |
| MLKL     | LINC02416  | 0.521228 | 3.64E-34 | postive |
| ZBP1     | LINC02416  | 0.641539 | 5.63E-56 | postive |
| TNFSF10  | LINC02416  | 0.617164 | 8.78E-51 | postive |
| TNFRSF1B | LINC02416  | 0.705659 | 3.47E-72 | postive |
| CYLD     | LINC02416  | 0.571474 | 3.47E-42 | postive |
| CFLAR    | LINC02416  | 0.56539  | 3.85E-41 | postive |
| FLT3     | LINC02416  | 0.466769 | 7.37E-27 | postive |
| CD40     | LINC02416  | 0.494458 | 2.07E-30 | postive |
| TARDBP   | AL606534.1 | 0.401648 | 1.10E-19 | postive |
| GATA3    | AC006305.1 | 0.449643 | 8.06E-25 | postive |
| MYCN     | AC006305.1 | 0.541409 | 3.17E-37 | postive |
| DDX58    | AL445490.1 | 0.55484  | 2.22E-39 | postive |
