# Supplementary material for: Comprehensive Analysis of Necroptosis Landscape in Skin Cutaneous Melanoma for Appealing its Implications in Prognosis Estimation and Microenvironment Status
Source: MDPI journal article supplement (doi:10.3390/jpm13020245), 2023-01-29
Supplement: s1 [file s1]

**Table S3 Immune cell bubble chart between high- and low-risk group in multi-platform.**

| immune                                         | cor      | pvalue   |
|------------------------------------------------|----------|----------|
| B cell_TIMER                                   | -0.13601 | 0.003541 |
| T cell CD4+_TIMER                              | -0.38549 | 1.13E-17 |
| T cell CD8+_TIMER                              | -0.51108 | 7.67E-32 |
| Neutrophil_TIMER                               | -0.52025 | 4.00E-33 |
| Macrophage_TIMER                               | -0.33825 | 1.01E-13 |
| Myeloid dendritic cell_TIMER                   | -0.48152 | 5.85E-28 |
| B cell naive_CIBERSORT                         | 0.107534 | 0.021351 |
| B cell memory_CIBERSORT                        | -0.12064 | 0.00976  |
| T cell CD8+_CIBERSORT                          | -0.6037  | 8.09E-47 |
| T cell CD4+ naive_CIBERSORT                    | 0.111933 | 0.016554 |
| T cell CD4+ memory resting_CIBERSORT           | 0.124396 | 0.007693 |
| T cell CD4+ memory activated_CIBERSORT         | -0.41592 | 1.38E-20 |
| T cell gamma delta_CIBERSORT                   | -0.32425 | 1.13E-12 |
| NK cell resting_CIBERSORT                      | 0.364191 | 8.22E-16 |
| NK cell activated_CIBERSORT                    | -0.40827 | 7.96E-20 |
| Monocyte_CIBERSORT                             | -0.11677 | 0.012398 |
| Macrophage M0_CIBERSORT                        | 0.372327 | 1.66E-16 |
| Macrophage M1_CIBERSORT                        | -0.41149 | 3.83E-20 |
| Macrophage M2_CIBERSORT                        | 0.246899 | 8.67E-08 |
| Myeloid dendritic cell resting_CIBERSORT       | -0.18057 | 0.000102 |
| Myeloid dendritic cell activated_CIBERSORT     | 0.139246 | 0.002823 |
| Mast cell activated_CIBERSORT                  | 0.202014 | 1.32E-05 |
| Eosinophil_CIBERSORT                           | 0.117068 | 0.012171 |
| B cell memory_CIBERSORT-ABS                    | -0.20907 | 6.42E-06 |
| B cell plasma_CIBERSORT-ABS                    | -0.19219 | 3.47E-05 |
| T cell CD8+_CIBERSORT-ABS                      | -0.67482 | 3.73E-62 |
| T cell CD4+ naive_CIBERSORT-ABS                | 0.107258 | 0.021688 |
| T cell CD4+ memory activated_CIBERSORT-ABS     | -0.43285 | 2.45E-22 |
| T cell follicular helper_CIBERSORT-ABS         | -0.53349 | 4.78E-35 |
| T cell regulatory (Tregs)_CIBERSORT-ABS        | -0.28549 | 4.88E-10 |
| T cell gamma delta_CIBERSORT-ABS               | -0.35669 | 3.46E-15 |
| NK cell resting_CIBERSORT-ABS                  | 0.334231 | 2.05E-13 |
| NK cell activated_CIBERSORT-ABS                | -0.55919 | 4.93E-39 |
| Monocyte_CIBERSORT-ABS                         | -0.31401 | 6.13E-12 |
| Macrophage M1_CIBERSORT-ABS                    | -0.58414 | 3.00E-43 |
| Macrophage M2_CIBERSORT-ABS                    | -0.40343 | 2.35E-19 |
| Myeloid dendritic cell resting_CIBERSORT-ABS   | -0.25143 | 4.92E-08 |
| Myeloid dendritic cell activated_CIBERSORT-ABS | 0.138206 | 0.003038 |
| Mast cell activated_CIBERSORT-ABS              | 0.103777 | 0.026361 |
| Mast cell resting_CIBERSORT-ABS                | -0.12374 | 0.008024 |
| B cell_QUANTISEQ                               | -0.33088 | 3.66E-13 |
| Macrophage M1_QUANTISEQ                        | -0.42883 | 6.52E-22 |

|                                        |          |          |
|----------------------------------------|----------|----------|
| Macrophage M2_QUANTISEQ                | -0.37156 | 1.93E-16 |
| Monocyte_QUANTISEQ                     | -0.10744 | 0.021467 |
| T cell CD4+ (non-regulatory)_QUANTISEQ | 0.375798 | 8.25E-17 |
| T cell CD8+_QUANTISEQ                  | -0.70415 | 8.16E-70 |
| T cell regulatory (Tregs)_QUANTISEQ    | -0.29253 | 1.73E-10 |
| Myeloid dendritic cell_QUANTISEQ       | 0.239558 | 2.12E-07 |
| uncharacterized cell_QUANTISEQ         | 0.517655 | 9.30E-33 |
| T cell_MCPCOUNTER                      | -0.40721 | 1.01E-19 |
| T cell CD8+_MCPCOUNTER                 | -0.68062 | 1.34E-63 |
| cytotoxicity score_MCPCOUNTER          | -0.55254 | 5.72E-38 |
| NK cell_MCPCOUNTER                     | -0.60008 | 3.86E-46 |
| B cell_MCPCOUNTER                      | -0.4439  | 1.55E-23 |
| Monocyte_MCPCOUNTER                    | -0.50614 | 3.63E-31 |
| Macrophage/Monocyte_MCPCOUNTER         | -0.50614 | 3.63E-31 |
| Myeloid dendritic cell_MCPCOUNTER      | -0.48347 | 3.33E-28 |
| Neutrophil_MCPCOUNTER                  | 0.189685 | 4.40E-05 |
| Myeloid dendritic cell activated_XCELL | -0.5713  | 4.91E-41 |
| B cell_XCELL                           | -0.5374  | 1.24E-35 |
| T cell CD4+ memory_XCELL               | -0.5188  | 6.41E-33 |
| T cell CD4+ naive_XCELL                | -0.49903 | 3.26E-30 |
| T cell CD4+ (non-regulatory)_XCELL     | -0.17202 | 0.000216 |
| T cell CD4+ effector memory_XCELL      | -0.18365 | 7.71E-05 |
| T cell CD8+ naive_XCELL                | -0.42162 | 3.65E-21 |
| T cell CD8+_XCELL                      | -0.67661 | 1.35E-62 |
| T cell CD8+ central memory_XCELL       | -0.69494 | 2.61E-67 |
| T cell CD8+ effector memory_XCELL      | -0.33515 | 1.74E-13 |
| Class-switched memory B cell_XCELL     | -0.4881  | 8.60E-29 |
| Myeloid dendritic cell_XCELL           | -0.39075 | 3.71E-18 |
| Macrophage_XCELL                       | -0.50585 | 3.98E-31 |
| Macrophage M1_XCELL                    | -0.50226 | 1.21E-30 |
| Macrophage M2_XCELL                    | -0.33765 | 1.12E-13 |
| B cell memory_XCELL                    | -0.37863 | 4.64E-17 |
| Monocyte_XCELL                         | -0.43135 | 3.53E-22 |
| B cell naive_XCELL                     | -0.39444 | 1.69E-18 |
| Plasmacytoid dendritic cell_XCELL      | -0.58558 | 1.67E-43 |
| B cell plasma_XCELL                    | -0.39416 | 1.79E-18 |
| T cell gamma delta_XCELL               | -0.12604 | 0.006917 |
| T cell CD4+ Th2_XCELL                  | -0.13255 | 0.004489 |
| T cell regulatory (Tregs)_XCELL        | -0.15662 | 0.00077  |
| immune score_XCELL                     | -0.61296 | 1.35E-48 |
| microenvironment score_XCELL           | -0.57952 | 1.92E-42 |
| B cell_EPIC                            | -0.41459 | 1.88E-20 |
| T cell CD8+_EPIC                       | -0.52465 | 9.38E-34 |
| Macrophage_EPIC                        | -0.52937 | 1.93E-34 |

|                           |          |          |
|---------------------------|----------|----------|
| NK cell_EPIC              | -0.27465 | 2.27E-09 |
| uncharacterized cell_EPIC | 0.371023 | 2.15E-16 |
