# Supplementary material for: Comprehensive Analysis of Necroptosis Landscape in Skin Cutaneous Melanoma for Appealing its Implications in Prognosis Estimation and Microenvironment Status
Source: MDPI journal article supplement (doi:10.3390/jpm13020245), 2023-01-29
Supplement: s1 [file s1]

Table S1 67 necroptosis-related genes.

Gene

FADD

FAS

FASLG

MLKL

RIPK1

RIPK3

TLR3

TNF

TSC1

TRIM11

CASP8

ZBP1

MAPK8

IPMK

ITPK1

SIRT3

MYC

TNFRSF1A

TNFSF10

TNFRSF1B

TRAF2

PANX1

OTULIN

CYLD

USP22

MAP3K7

SQSTM1

STAT3

DIABLO

DNMT1

CFLAR

BRAF

AXL

ID1

CDKN2A

HSPA4

BCL2

STUB1

FLT3

HAT1

SIRT2

SIRT1

PLK1  
MPG  
BACH2  
GATA3  
MYCN  
ALK  
ATRX  
TERT  
SLC39A7  
SPATA2  
RNF31  
IDH1  
IDH2  
KLF9  
HDAC9  
HSP90AA1  
LEF1  
BNIP3  
CD40  
BCL2L11  
EGFR  
DDX58  
TARDBP  
APP  
TNFRSF21
