# Supplementary material for: Comprehensive Analysis of Necroptosis Landscape in Skin Cutaneous Melanoma for Appealing its Implications in Prognosis Estimation and Microenvironment Status
Source: MDPI journal article supplement (doi:10.3390/jpm13020245), 2023-01-29
Supplement: s1 [file s1]

**Table S4 Different Subtypes in SKCM based on expressions of 4 necroptosis-related genes.**

| ID           | Cluster |
|--------------|---------|
| TCGA-FS-A1Z0 | C1      |
| TCGA-EE-A2ME | C1      |
| TCGA-EB-A6R0 | C2      |
| TCGA-EE-A2MT | C2      |
| TCGA-WE-A8K5 | C2      |
| TCGA-D9-A1JX | C1      |
| TCGA-FS-A1ZM | C2      |
| TCGA-FS-A1YY | C2      |
| TCGA-EE-A2A6 | C2      |
| TCGA-FS-A4F0 | C2      |
| TCGA-FS-A4F9 | C1      |
| TCGA-EB-A4IQ | C2      |
| TCGA-EB-A24C | C2      |
| TCGA-WE-A8ZR | C2      |
| TCGA-EE-A2A2 | C2      |
| TCGA-ER-A196 | C2      |
| TCGA-DA-A1IB | C2      |
| TCGA-D3-A8GV | C1      |
| TCGA-XV-A9W2 | C2      |
| TCGA-W3-AA1O | C2      |
| TCGA-FS-A4FD | C1      |
| TCGA-EE-A2GL | C1      |
| TCGA-EB-A1NK | C2      |
| TCGA-BF-AAP6 | C2      |
| TCGA-EB-A85J | C2      |
| TCGA-EE-A2MC | C2      |
| TCGA-GN-A263 | C2      |
| TCGA-FS-A1Z3 | C1      |
| TCGA-IH-A3EA | C1      |
| TCGA-EE-A180 | C2      |
| TCGA-EB-A550 | C1      |
| TCGA-W3-AA1Q | C1      |
| TCGA-D3-A2J9 | C1      |
| TCGA-BF-A1Q0 | C2      |
| TCGA-EE-A2GI | C2      |
| TCGA-EE-A29L | C2      |
| TCGA-EE-A2ML | C1      |
| TCGA-FS-A1ZK | C2      |
| TCGA-GN-A4U5 | C1      |
| TCGA-EE-A2MJ | C1      |
| TCGA-D3-A2JE | C2      |

|              |    |
|--------------|----|
| TCGA-D9-A3Z1 | C2 |
| TCGA-EE-A3JI | C1 |
| TCGA-D9-A4Z2 | C1 |
| TCGA-EB-A44Q | C2 |
| TCGA-RP-A690 | C2 |
| TCGA-ER-A2NG | C2 |
| TCGA-EE-A29S | C1 |
| TCGA-ER-A19K | C2 |
| TCGA-WE-AAA3 | C1 |
| TCGA-EB-A5UM | C1 |
| TCGA-D3-A51T | C1 |
| TCGA-EB-A3XD | C1 |
| TCGA-D9-A4Z6 | C1 |
| TCGA-EE-A2MG | C1 |
| TCGA-EB-A431 | C2 |
| TCGA-GN-A26D | C2 |
| TCGA-FS-A1ZB | C2 |
| TCGA-ER-A19P | C1 |
| TCGA-D3-A3MU | C1 |
| TCGA-D3-A8GN | C1 |
| TCGA-EE-A2MI | C1 |
| TCGA-ER-A2NB | C2 |
| TCGA-EB-A5SH | C1 |
| TCGA-D3-A2JG | C1 |
| TCGA-ER-A19F | C2 |
| TCGA-FW-A5DX | C2 |
| TCGA-GF-A2C7 | C1 |
| TCGA-EE-A3AC | C2 |
| TCGA-D3-A1QA | C2 |
| TCGA-D3-A2JH | C1 |
| TCGA-DA-A1I7 | C1 |
| TCGA-EE-A2GT | C2 |
| TCGA-BF-A3DN | C1 |
| TCGA-D3-A8GR | C2 |
| TCGA-FS-A4F5 | C2 |
| TCGA-D9-A6E9 | C1 |
| TCGA-EE-A3JD | C2 |
| TCGA-3N-A9WB | C2 |
| TCGA-EB-A6L9 | C2 |
| TCGA-GF-A3OT | C2 |
| TCGA-EE-A2MD | C2 |
| TCGA-BF-AAP1 | C1 |
| TCGA-XV-AAZW | C1 |
| TCGA-EB-A44N | C1 |

|              |    |
|--------------|----|
| TCGA-D9-A6EC | C2 |
| TCGA-QB-A6FS | C2 |
| TCGA-W3-A828 | C2 |
| TCGA-XV-AAZY | C2 |
| TCGA-DA-A1IC | C1 |
| TCGA-EE-A17Y | C1 |
| TCGA-EB-A553 | C2 |
| TCGA-BF-A5EQ | C2 |
| TCGA-DA-A3F8 | C1 |
| TCGA-EE-A29B | C2 |
| TCGA-D3-A3CF | C2 |
| TCGA-EB-A4P0 | C2 |
| TCGA-RP-A693 | C1 |
| TCGA-DA-A95Y | C2 |
| TCGA-QB-AA9O | C2 |
| TCGA-EE-A2GS | C1 |
| TCGA-FS-A4FB | C1 |
| TCGA-D3-A8GJ | C1 |
| TCGA-BF-A5EO | C1 |
| TCGA-ER-A19T | C1 |
| TCGA-BF-A9VF | C2 |
| TCGA-GN-A4U3 | C2 |
| TCGA-FS-A1Z4 | C2 |
| TCGA-EE-A2MS | C1 |
| TCGA-D3-A8GK | C2 |
| TCGA-EE-A3J7 | C1 |
| TCGA-OD-A75X | C1 |
| TCGA-DA-A95Z | C1 |
| TCGA-FR-A7UA | C2 |
| TCGA-EE-A184 | C2 |
| TCGA-WE-A8K1 | C2 |
| TCGA-D9-A4Z3 | C2 |
| TCGA-FS-A1ZT | C1 |
| TCGA-ER-A19S | C1 |
| TCGA-EE-A20C | C2 |
| TCGA-EB-A3HV | C1 |
| TCGA-EE-A182 | C2 |
| TCGA-GN-A26C | C2 |
| TCGA-D3-A2JB | C2 |
| TCGA-EB-A3XF | C1 |
| TCGA-ER-A42K | C1 |
| TCGA-Z2-AA3S | C2 |
| TCGA-D3-A8GB | C2 |
| TCGA-FR-A729 | C1 |

|              |    |
|--------------|----|
| TCGA-EE-A2A0 | C1 |
| TCGA-DA-A3F2 | C2 |
| TCGA-W3-A825 | C1 |
| TCGA-EE-A29W | C1 |
| TCGA-GN-A267 | C2 |
| TCGA-EB-A42Y | C1 |
| TCGA-Z2-A8RT | C1 |
| TCGA-D3-A3MO | C1 |
| TCGA-DA-A1I1 | C1 |
| TCGA-FS-A4F8 | C1 |
| TCGA-EE-A3JB | C1 |
| TCGA-D9-A149 | C2 |
| TCGA-EB-A6QZ | C1 |
| TCGA-ER-A198 | C2 |
| TCGA-EE-A29C | C2 |
| TCGA-3N-A9WD | C2 |
| TCGA-D3-A8GP | C1 |
| TCGA-BF-AAP8 | C1 |
| TCGA-DA-A1I2 | C1 |
| TCGA-WE-A8ZY | C2 |
| TCGA-D3-A1QB | C1 |
| TCGA-ER-A2NC | C2 |
| TCGA-EE-A2MP | C1 |
| TCGA-DA-A1I0 | C2 |
| TCGA-EB-A4OY | C2 |
| TCGA-W3-AA1V | C1 |
| TCGA-ER-A19D | C2 |
| TCGA-GF-A769 | C1 |
| TCGA-XV-AB01 | C1 |
| TCGA-EE-A2M7 | C1 |
| TCGA-DA-A1I4 | C2 |
| TCGA-EB-A5SE | C1 |
| TCGA-D9-A148 | C2 |
| TCGA-EE-A2GN | C1 |
| TCGA-EE-A2GR | C2 |
| TCGA-FS-A1YX | C1 |
| TCGA-EE-A29Q | C2 |
| TCGA-FW-A3R5 | C2 |
| TCGA-EB-A6QY | C2 |
| TCGA-BF-AAP7 | C1 |
| TCGA-EE-A2GK | C1 |
| TCGA-EB-A3XE | C1 |
| TCGA-EE-A20I | C2 |
| TCGA-FS-A1ZW | C2 |

|              |    |
|--------------|----|
| TCGA-FR-A8YD | C1 |
| TCGA-W3-AA1R | C2 |
| TCGA-YD-A89C | C2 |
| TCGA-EB-A5SG | C1 |
| TCGA-EE-A2MU | C2 |
| TCGA-ER-A2NE | C2 |
| TCGA-D3-A1Q4 | C1 |
| TCGA-DA-A95W | C1 |
| TCGA-DA-A1HY | C2 |
| TCGA-D3-A3CC | C1 |
| TCGA-D3-A51K | C1 |
| TCGA-ER-A19J | C1 |
| TCGA-FW-A3TU | C2 |
| TCGA-EE-A185 | C2 |
| TCGA-D3-A8GS | C1 |
| TCGA-D3-A5GR | C1 |
| TCGA-EE-A3J3 | C1 |
| TCGA-ER-A3PL | C1 |
| TCGA-BF-AAOU | C1 |
| TCGA-EE-A2GO | C1 |
| TCGA-D3-A2JL | C2 |
| TCGA-XV-AAZV | C1 |
| TCGA-FR-A7U8 | C1 |
| TCGA-GN-A26A | C1 |
| TCGA-EE-A2MK | C1 |
| TCGA-DA-A1IA | C2 |
| TCGA-GN-A4U7 | C2 |
| TCGA-EE-A2GH | C2 |
| TCGA-FR-A3YN | C2 |
| TCGA-WE-AAA4 | C2 |
| TCGA-FR-A2OS | C2 |
| TCGA-WE-A8ZX | C2 |
| TCGA-D3-A2JF | C1 |
| TCGA-D3-A1Q6 | C2 |
| TCGA-EB-A299 | C1 |
| TCGA-EE-A2MH | C1 |
| TCGA-GN-A268 | C2 |
| TCGA-D3-A2JP | C1 |
| TCGA-FR-A8YE | C1 |
| TCGA-D9-A3Z3 | C2 |
| TCGA-YD-A9TA | C2 |
| TCGA-FS-A1ZD | C2 |
| TCGA-D9-A1X3 | C2 |
| TCGA-EE-A29A | C2 |

|              |    |
|--------------|----|
| TCGA-ER-A42H | C2 |
| TCGA-EE-A2GB | C2 |
| TCGA-BF-A5ES | C2 |
| TCGA-EB-A5VV | C2 |
| TCGA-BF-A3DJ | C1 |
| TCGA-D3-A8GL | C2 |
| TCGA-ER-A19E | C2 |
| TCGA-GN-A4U4 | C2 |
| TCGA-GF-A4EO | C1 |
| TCGA-EE-A29M | C2 |
| TCGA-EE-A3JH | C1 |
| TCGA-GF-A6C9 | C2 |
| TCGA-Z2-AA3V | C1 |
| TCGA-D3-A1Q3 | C2 |
| TCGA-EE-A3J8 | C1 |
| TCGA-D9-A1JW | C2 |
| TCGA-FS-A1ZY | C2 |
| TCGA-GN-A266 | C2 |
| TCGA-EE-A181 | C1 |
| TCGA-FS-A4F2 | C2 |
| TCGA-FW-A3TV | C2 |
| TCGA-EE-A29P | C1 |
| TCGA-ER-A195 | C1 |
| TCGA-FS-A1ZS | C1 |
| TCGA-BF-AAP0 | C1 |
| TCGA-ER-A2NF | C2 |
| TCGA-FS-A4FC | C1 |
| TCGA-FS-A1ZR | C1 |
| TCGA-D3-A1Q1 | C1 |
| TCGA-DA-A95V | C1 |
| TCGA-EE-A2GE | C1 |
| TCGA-HR-A2OG | C2 |
| TCGA-BF-A3DL | C2 |
| TCGA-FS-A1ZJ | C1 |
| TCGA-FW-A5DY | C1 |
| TCGA-BF-AAP4 | C2 |
| TCGA-GN-A264 | C1 |
| TCGA-D3-A8GE | C1 |
| TCGA-FS-A1ZG | C2 |
| TCGA-D3-A2JD | C2 |
| TCGA-EE-A3AB | C1 |
| TCGA-FR-A7U9 | C2 |
| TCGA-EB-A5KH | C2 |
| TCGA-D3-A51J | C1 |

|              |    |
|--------------|----|
| TCGA-ER-A19Q | C2 |
| TCGA-D3-A1Q9 | C2 |
| TCGA-ER-A19B | C1 |
| TCGA-FS-A1ZH | C1 |
| TCGA-ER-A19M | C1 |
| TCGA-GF-A6C8 | C2 |
| TCGA-ER-A197 | C1 |
| TCGA-DA-A3F5 | C2 |
| TCGA-D3-A3C8 | C1 |
| TCGA-EE-A3JE | C1 |
| TCGA-BF-A1PV | C2 |
| TCGA-D3-A2J8 | C2 |
| TCGA-BF-A1PU | C1 |
| TCGA-GN-A262 | C2 |
| TCGA-D3-A1Q5 | C1 |
| TCGA-EB-A4IS | C2 |
| TCGA-EB-A41A | C2 |
| TCGA-D3-A51R | C2 |
| TCGA-EE-A17X | C2 |
| TCGA-EE-A2MM | C1 |
| TCGA-EE-A20H | C1 |
| TCGA-EE-A2MN | C1 |
| TCGA-WE-A8ZO | C1 |
| TCGA-EB-A57M | C1 |
| TCGA-WE-A8K6 | C1 |
| TCGA-ER-A1A1 | C2 |
| TCGA-BF-A5ER | C2 |
| TCGA-EE-A20B | C1 |
| TCGA-D3-A3MR | C1 |
| TCGA-D9-A6EG | C2 |
| TCGA-EB-A5SF | C2 |
| TCGA-EE-A29D | C1 |
| TCGA-EB-A5UL | C2 |
| TCGA-EB-A97M | C2 |
| TCGA-3N-A9WC | C1 |
| TCGA-EE-A29X | C2 |
| TCGA-XV-A9W5 | C1 |
| TCGA-EE-A2GD | C1 |
| TCGA-D3-A51E | C1 |
| TCGA-FS-A1ZN | C1 |
| TCGA-EE-A29T | C1 |
| TCGA-EE-A2M5 | C2 |
| TCGA-FR-A69P | C1 |
| TCGA-BF-AAP2 | C2 |

|              |    |
|--------------|----|
| TCGA-HR-A2OH | C1 |
| TCGA-EE-A2MQ | C2 |
| TCGA-FR-A44A | C1 |
| TCGA-DA-A3F3 | C2 |
| TCGA-D3-A51F | C1 |
| TCGA-FS-A1ZA | C2 |
| TCGA-D3-A2JA | C2 |
| TCGA-EE-A29N | C1 |
| TCGA-EB-A24D | C1 |
| TCGA-EE-A3JA | C2 |
| TCGA-D3-A3C7 | C2 |
| TCGA-RP-A694 | C2 |
| TCGA-EB-A4OZ | C1 |
| TCGA-FS-A1ZP | C1 |
| TCGA-GN-A4U9 | C1 |
| TCGA-WE-AA9Y | C1 |
| TCGA-EE-A2A5 | C1 |
| TCGA-EE-A2M6 | C1 |
| TCGA-D3-A2JK | C1 |
| TCGA-D3-A1Q7 | C1 |
| TCGA-ER-A19A | C1 |
| TCGA-DA-A960 | C1 |
| TCGA-GN-A4U8 | C1 |
| TCGA-EE-A3AD | C1 |
| TCGA-FR-A3R1 | C2 |
| TCGA-EE-A183 | C2 |
| TCGA-EE-A29E | C2 |
| TCGA-EE-A29H | C2 |
| TCGA-FS-A1ZZ | C2 |
| TCGA-EE-A3AG | C1 |
| TCGA-GN-A9SD | C1 |
| TCGA-EE-A2GU | C1 |
| TCGA-ER-A3ET | C2 |
| TCGA-YG-AA3O | C1 |
| TCGA-EE-A2MF | C2 |
| TCGA-EB-A44O | C2 |
| TCGA-FS-A1ZQ | C1 |
| TCGA-EE-A3J4 | C1 |
| TCGA-FR-A726 | C1 |
| TCGA-FS-A1ZF | C2 |
| TCGA-FS-A1ZC | C2 |
| TCGA-WE-A8ZM | C1 |
| TCGA-ER-A193 | C1 |
| TCGA-W3-AA21 | C1 |



|              |    |
|--------------|----|
| TCGA-D9-A3Z4 | C1 |
| TCGA-WE-A8ZN | C2 |
| TCGA-WE-A8ZQ | C1 |
| TCGA-BF-A1PZ | C2 |
| TCGA-ER-A2ND | C2 |
| TCGA-D3-A5GN | C1 |
| TCGA-XV-A9VZ | C2 |
| TCGA-EB-A5UN | C2 |
| TCGA-EE-A3AA | C2 |
| TCGA-FR-A728 | C1 |
| TCGA-HR-A5NC | C1 |
| TCGA-DA-A1HV | C1 |
| TCGA-GN-A8LL | C2 |
| TCGA-ER-A42L | C2 |
| TCGA-D3-A8GQ | C2 |
| TCGA-W3-AA1W | C1 |
| TCGA-EB-A41B | C2 |
| TCGA-WE-A8JZ | C2 |
| TCGA-D3-A1Q8 | C1 |
| TCGA-D9-A6EA | C1 |
| TCGA-EB-A5FP | C2 |
| TCGA-EB-A82B | C2 |
| TCGA-EB-A3Y7 | C2 |
| TCGA-ER-A19H | C1 |
| TCGA-D3-A3C6 | C1 |
| TCGA-D3-A3MV | C2 |
| TCGA-ER-A19W | C1 |
| TCGA-EE-A17Z | C1 |
| TCGA-FS-A4F4 | C2 |
| TCGA-ER-A199 | C1 |
| TCGA-D3-A5GT | C2 |
| TCGA-WE-A8K4 | C2 |
| TCGA-FS-A1Z7 | C1 |
| TCGA-DA-A1HW | C1 |
| TCGA-D3-A5GU | C1 |
| TCGA-GN-A8LK | C2 |
| TCGA-EE-A2M8 | C1 |
| TCGA-GN-A8LN | C2 |
| TCGA-EE-A3AF | C2 |
| TCGA-EB-A42Z | C1 |
| TCGA-D3-A3CE | C1 |
| TCGA-EE-A20F | C2 |
| TCGA-WE-A8ZT | C1 |
| TCGA-EE-A2GC | C1 |

|              |    |
|--------------|----|
| TCGA-BF-A5EP | C2 |
| TCGA-D9-A4Z5 | C2 |
| TCGA-EB-A3XB | C1 |
| TCGA-EB-A5VU | C1 |
| TCGA-D3-A51H | C2 |
| TCGA-D3-A3BZ | C1 |
| TCGA-EE-A29R | C1 |
| TCGA-BF-AAOX | C2 |
| TCGA-ER-A3ES | C2 |
| TCGA-ER-A2NH | C1 |
| TCGA-EB-A551 | C2 |
| TCGA-FR-A8YC | C1 |
| TCGA-GN-A265 | C2 |
| TCGA-D3-A5GS | C1 |
| TCGA-D3-A8GC | C2 |
| TCGA-EE-A2MR | C2 |
| TCGA-EB-A51B | C2 |
| TCGA-D3-A5GO | C2 |
| TCGA-ER-A19C | C2 |
| TCGA-ER-A19G | C2 |
| TCGA-EE-A29V | C2 |
| TCGA-FS-A1ZE | C2 |
| TCGA-EB-A85I | C1 |
| TCGA-D3-A2J7 | C2 |
| TCGA-D3-A8GM | C2 |
| TCGA-ER-A3EV | C1 |
| TCGA-EE-A2GM | C2 |
| TCGA-EB-A44P | C1 |
| TCGA-D3-A2JO | C2 |
| TCGA-EE-A3AH | C1 |
| TCGA-DA-A1I8 | C1 |
| TCGA-EB-A82C | C1 |
| TCGA-WE-AAA0 | C2 |
| TCGA-FW-A3I3 | C1 |
| TCGA-EE-A2GP | C1 |
| TCGA-BF-A3DM | C1 |
| TCGA-ER-A19L | C1 |
| TCGA-LH-A9QB | C2 |
| TCGA-DA-A95X | C1 |
| TCGA-FS-A1ZU | C1 |
| TCGA-D3-A2JC | C1 |
| TCGA-D3-A8GD | C2 |
| TCGA-D3-A2J6 | C2 |
| TCGA-ER-A194 | C2 |

|              |    |
|--------------|----|
| TCGA-EE-A2GJ | C1 |
| TCGA-BF-A1PX | C1 |
| TCGA-EB-A4XL | C1 |
| TCGA-D3-A3CB | C1 |
| TCGA-EE-A2A1 | C1 |
| TCGA-FS-A1YW | C1 |
| TCGA-D3-A51N | C2 |
| TCGA-YG-AA3N | C2 |
| TCGA-EE-A3J5 | C1 |
| TCGA-DA-A1I5 | C1 |
| TCGA-EB-A44R | C1 |
| TCGA-YG-AA3P | C2 |
| TCGA-W3-A824 | C1 |
| TCGA-D3-A8GI | C1 |
| TCGA-D3-A5GL | C2 |
| TCGA-EE-A29G | C2 |
| TCGA-EB-A3XC | C2 |
| TCGA-D3-A2JN | C1 |
| TCGA-D3-A3ML | C1 |
| TCGA-ER-A19N | C2 |
| TCGA-EB-A3Y6 | C2 |
