# Supplementary material for: Comprehensive Analysis of Necroptosis Landscape in Skin Cutaneous Melanoma for Appealing its Implications in Prognosis Estimation and Microenvironment Status
Source: J Pers Med. 2023 Jan 29;13(2):245. doi: 10.3390/jpm13020245 (PMC9962795; doi:10.3390/jpm13020245)
Supplement: Supplementary file 1 [file jpm-13-00245-s001.zip]

Archive with 6 entries (6 files):
- Supplement_Figure.pdf
- Supplement_TableS1.pdf
- Supplement_TableS2.pdf
- Supplement_TableS3.pdf
- Supplement_TableS4.pdf
- Supplement_TableS5.pdf
